# Supplementary material for: Identification of Hub Genes, Modules and Metabolic Pathways Associated With Lung Adenocarcinoma: A System Biology Approach
Source: Research Square preprint supplement (doi:10.21203/rs.3.rs-111252/v1), 2020-11-30
Supplement: Supplementary file 3 [file Title_page.docx]

**Identification of hub genes, modules and metabolic pathways associated with lung adenocarcinoma: a system biology approach**

Raheleh Roudi 1, Behnaz Beikzadeh 2, Giandomenico Roviello 3, Alberto D'angelo 4, Morteza Hadizadeh *, 5

1 Department of Cell Systems and Anatomy, University of Texas Health San Antonio, San Antonio, TX, USA

2 Department of Molecular Genetics, Faculty of Biological Sciences, Tarbiat Modares University, Tehran, Iran

3 Department of Health Sciences, University of Florence, Florence, Italy

4 Department of Biology and Biochemistry, University of Bath, Bath, B2 7AY, UK

5 Physiology Research Center, Institute of Basic and Clinical Physiology Sciences, Kerman University of Medical Sciences, Kerman, Iran

* Corresponding author;

Morteza Hadizadeh

Physiology Research Center, Institute of Basic and Clinical Physiology Sciences, Kerman University of Medical Sciences, Kerman, Iran

Email; morteza.hadizade@gmail.com
