# Supplementary material for: Identification of Hub Genes, Modules and Metabolic Pathways Associated With Lung Adenocarcinoma: A System Biology Approach
Source: Research Square preprint supplement (doi:10.21203/rs.3.rs-111252/v1), 2020-11-30
Supplement: Supplementary file 7 [file 433aebd8053847d1f431c7e8.xlsx]

## Sheet: IA-control
Up Regulated	Down Regulated
7076	177
7153	2167
27242	6943
6804	7123
55765	762
27237	11170
4320	7010
6696	58494
1277	857
3856	10894
2118	5175
6513	1910
1300	125
1951	948
991	2273
2525	6457
26575	9806
1063	11095
80164	51751
259266	1901
1382	2327
3149	256949
3783	9079
2524	33
51361	1003
25803	2823
7058	51267
2161	1036
9245	8676
7083	55679
7262	5348
10381	51705
1001	2869
347735	28984
101	2662
56649	2949
9833	2824
50512	94
3706	5787
89944	6445
9133	1346
2810	53826
1281	1410
1290	2690
1365	2277
1311	64174
23213	79987
10551	29091
4321	51208
1469	7049
1356	2294
4318	858
2861	7134
6690	22918
1917	3043
6447	4239
51557	283298
56521	8406
5307	9365
1048	9457
10874	8436
5121	54922
768	2034
10563	55273
24	3316
25789	3202
54997	10268
9244	54674
3866	64321
1591	8547
3934	361
94025	10266
57016	25928
2877	154
6286	1675
	1776
	10351
	53405
	7122
	284
	23328
	11326
	3730
	26577
	185
	55022
	10974
	8639
	4499
	27074
	51285
	55340
	4023
	10516
	6622
	9314
	10203
	2719
	55321
	25959
	590
	1318
	2878
	4005
	9413
	79825
	1066
	7056
	7450
	1839
	2791
	1012
	5376
	9353
	55118
	140597
	7111
	6368
	2624
	79652
	8404
	1361
	6387
	53346
	57188
	728
	8685
	7078
	6586
	81563
	6532
	389136
	2159
	2206
	2819
	84617
	26353
	22915
	2357
	10186
	55303
	8839
	7102
	2615
	8630
	1580
	55282
	2358
	79927
	316
	80704
	1043
	7433
	1674
	124
	4091
	1359
	10810
	1634
	79413
	5166
	57088
	80761
	157869
	4973
	25890
	5319
	845
	9254
	11027
	3399
	58189
	4332
	126393
	760
	56729
	9510
	2219
	11197
	366
	820
	27063
	6274
	6275
	241
	8835
	2532
	84830
	10223
	730
	5730
	6505
	10871
	1959
	8854
	3569
	1805
	4118
	6279
	3047
	712
	969
	2328
	2619
	7305
	2352
	306
	64116
	9022
	7538
	54345
	732
	7177
	7832
	5552
	1667
	5225
	216
	21
	3553
	72
	51316
	13
	2920
	6440
	55214
	2354
	81575
	7704
	6590
	6441
	4069
	249
	11013
	8076
	1511
	7356
	79645
	722

## Sheet: IB-control
Up Regulated	Down Regulated
7076	177
7153	2167
6696	6943
991	7123
27242	762
1300	11170
4320	7010
3856	857
7083	5175
2118	125
6513	1910
1277	1901
55765	51751
9133	948
7058	33
6790	10894
3149	58494
6804	9079
259266	1003
10112	9806
6676	11095
9245	256949
1063	55273
9833	51267
2524	2869
55165	2273
7272	28984
51361	2823
56649	8676
23624	51705
1951	2327
1382	6711
9212	5787
9055	2294
55355	55679
11004	51208
10381	2824
1001	1036
80164	2277
101	2662
26575	9365
1594	6445
22974	5348
8318	7134
55612	29091
2525	94
7262	6457
27324	22918
8140	7049
1365	53826
50512	7122
26585	858
89944	54922
1281	8434
4318	2034
2810	2690
3706	1346
1290	3043
25803	9457
1469	10351
23213	8406
5307	8547
1311	4239
6690	3730
1917	2949
3486	25928
1048	64174
10563	54674
4321	23328
56521	8436
1356	79987
51557	10974
6447	361
4312	10268
347733	27074
24	10266
10874	53905
10643	1410
3866	8639
1591	154
3026	64321
5121	283298
94025	9314
9547	3316
3934	1675
5047	11326
6947	185
2877	8727
6286	5376
	9413
	51285
	7450
	10203
	55022
	1305
	57188
	284
	1776
	4005
	79652
	53405
	55340
	26577
	3202
	79825
	7056
	590
	10516
	9353
	2719
	6622
	8404
	55118
	10186
	389136
	8685
	4499
	25959
	1012
	11197
	53346
	1361
	1318
	4023
	2202
	2878
	2615
	4091
	55321
	6532
	760
	26353
	140597
	6368
	1839
	81563
	5166
	124
	2624
	1359
	23266
	2206
	728
	79974
	2791
	10810
	25890
	9839
	1066
	83604
	6387
	7433
	7102
	2819
	58189
	1043
	22998
	316
	55303
	22915
	1634
	4973
	6586
	80761
	7078
	57088
	9254
	2358
	79927
	3399
	7111
	80704
	2357
	8839
	845
	6275
	4332
	1580
	4008
	9037
	306
	10319
	126393
	8835
	56729
	1674
	55282
	241
	3777
	9510
	6440
	8630
	5319
	9022
	79413
	2219
	4118
	6578
	11027
	10871
	366
	27063
	2532
	6274
	820
	7305
	730
	51090
	2920
	4629
	5730
	65055
	157869
	969
	2207
	8854
	22854
	6505
	712
	5552
	7538
	64116
	732
	3047
	3575
	358
	21
	3397
	216
	54345
	7177
	51316
	2352
	6441
	5225
	6279
	3569
	7704
	1667
	55214
	6590
	72
	79625
	2354
	3553
	7356
	13
	3248
	4069
	1511
	79645
	722

## Sheet: IIA-control
Up Regulated	Down Regulated
26472	177
4830	2167
5050	7123
7076	6943
7153	762
899	857
11065	11170
991	51751
1063	9079
4173	7010
54972	11095
8318	28984
55143	125
55165	10894
4320	1910
9212	58494
7083	33
65108	2273
10112	948
1277	1003
6790	5175
9055	2327
9133	51208
22974	858
1382	256949
64151	1901
259266	2662
6696	5787
6804	6711
55355	55679
2305	5348
55765	2823
4318	51705
6491	8676
80178	9806
4171	2869
54894	1036
332	4239
80164	6457
2118	51267
11004	7049
3149	1675
9833	22918
9232	8436
3161	7134
10381	79026
51361	54922
9401	2690
1300	55273
891	2294
2524	29091
3832	79987
1301	8547
7058	9365
7272	8434
79586	2824
10024	10351
9536	8639
5365	9457
56660	51285
51659	6445
3856	1346
6676	25928
24137	847
54478	2264
4321	7122
7262	8406
23624	10979
9787	124
81620	6867
5214	23328
26575	361
1594	284
83461	9314
26585	10516
50512	2949
23213	53405
6513	590
1311	10974
1033	9413
1469	2277
2810	2034
6690	1410
9245	79825
1001	6237
56649	25959
5121	83604
2525	94
1951	8727
8140	7450
347735	29995
1290	5468
3706	63876
10563	2719
1281	55022
83715	10203
1365	10268
930	154
27099	8404
8483	1776
27286	10186
1917	3202
1356	10266
1048	9452
3026	64321
6447	185
25803	25890
27299	283298
347733	27074
57214	2878
4312	3043
10874	53826
5003	8425
629	3316
164656	3730
56521	57088
5307	8630
9319	79974
3866	64174
4608	2615
2676	8322
27344	53905
1591	4023
5047	2202
10643	7056
51557	7075
9547	9353
94025	79652
1620	54674
6286	57188
	58189
	79901
	5797
	8685
	2040
	3384
	760
	4091
	7102
	81563
	1580
	4499
	23645
	389136
	2159
	5627
	1839
	22998
	55321
	11326
	2206
	1359
	9912
	26577
	55282
	5734
	1066
	55118
	4005
	5376
	4129
	53346
	6586
	5319
	284119
	23266
	11197
	1361
	2852
	6622
	1318
	9839
	2624
	3949
	79927
	6368
	9254
	306
	687
	9022
	4008
	7433
	728
	1842
	6532
	55340
	4973
	10319
	7078
	80761
	22915
	9510
	1012
	8839
	10365
	26353
	5166
	84981
	2791
	1634
	84617
	5745
	51090
	56729
	6440
	51232
	2357
	10810
	8835
	2358
	65055
	4629
	6909
	1674
	29931
	845
	6387
	730
	140597
	3399
	1843
	4688
	9749
	316
	80704
	11027
	6505
	3777
	7538
	55214
	1043
	6590
	79413
	4332
	6275
	216
	2532
	10223
	126393
	79887
	79625
	84830
	22854
	8796
	8991
	27063
	1604
	157869
	366
	72
	54345
	3397
	820
	6274
	64116
	5730
	9200
	1264
	2920
	55081
	241
	1959
	7704
	2354
	79148
	945
	23242
	440712
	1906
	969
	732
	7177
	2219
	21
	3047
	7305
	51316
	1805
	4493
	4256
	4069
	2203
	3569
	5552
	2352
	7356
	3851
	358
	6279
	2328
	5225
	6441
	1667
	2353
	13
	6439
	55450
	1511
	650
	249
	3248
	4929
	3117
	79645
	722
	3119
	10232

## Sheet: IIB-control
Up Regulated	Down Regulated
26472	177
7153	2167
6696	7123
4173	6943
4320	762
991	857
7076	11170
5050	7010
1063	5175
6491	125
55143	58494
55765	51751
259266	9079
9833	2327
4171	1910
65108	33
30001	11095
55165	948
64151	1003
10112	2273
3161	9806
891	10894
6804	256949
1277	2869
3832	1901
7083	28984
7272	55679
9055	51705
4318	5348
22974	1036
3856	2823
54972	5787
9212	2662
11065	6711
51361	858
80178	51267
51659	7134
1382	8676
81620	10351
9133	8547
6513	7049
6790	51208
24137	2277
1300	22918
9787	55273
7058	2294
4751	4239
3149	1346
55355	1675
56992	6445
890	6457
8318	8639
2305	2824
101	51285
11004	94
10381	54922
9245	6867
2118	9365
2524	9452
2810	8436
23624	79987
80164	64174
9536	8434
1033	7450
26585	3043
1951	23328
1001	1776
4321	154
26575	10268
50512	2949
6495	3730
1281	7122
2525	7075
7262	9457
1356	8322
27324	8613
8140	283298
23213	63876
3706	284
1290	29091
1048	10266
55872	25928
5307	847
89944	5376
10874	54674
1311	8406
6447	1410
2861	27074
25803	361
10643	590
1365	53826
9319	55340
56521	64321
1917	2202
3866	2034
6690	10516
1469	185
51557	2690
10563	6237
4312	10186
27344	8404
94025	5797
5121	3316
2877	7056
6947	57188
6286	9353
9547	2719
347733	10974
	4023
	53405
	10203
	9413
	4129
	2615
	2878
	4091
	79652
	29995
	55321
	55022
	3202
	9535
	8727
	26353
	1361
	79825
	284119
	8630
	25890
	9912
	81563
	2701
	25959
	1359
	6586
	2791
	5734
	4499
	55282
	9254
	55118
	23645
	2206
	11326
	6368
	389136
	4005
	1043
	83604
	9314
	11197
	1066
	57088
	2852
	58189
	8685
	1839
	1580
	6403
	6532
	53346
	1318
	2624
	26577
	124
	1634
	22915
	5319
	1842
	7102
	55303
	22998
	84981
	10365
	306
	730
	8839
	1012
	2819
	80761
	23266
	7433
	9839
	9022
	54996
	79927
	84617
	5166
	80704
	6387
	6440
	5730
	79901
	11027
	316
	7078
	56729
	79413
	3398
	10319
	728
	9510
	8835
	2532
	845
	10810
	5627
	760
	51090
	4973
	6275
	2357
	21
	1674
	3777
	6578
	126393
	241
	4332
	1593
	4118
	65055
	55214
	3399
	79625
	64116
	79762
	6274
	1959
	2219
	1805
	969
	4629
	358
	6441
	84830
	3047
	7538
	2920
	6505
	820
	7177
	5225
	732
	140597
	366
	7305
	27063
	5552
	3067
	3575
	3569
	9200
	6590
	54345
	722
	216
	712
	3397
	2354
	4256
	7704
	51316
	1667
	2352
	157869
	6279
	4069
	6439
	7356
	1511
	55450
	249
	3489
	13
	3248
	4929

## Sheet: IIIA-control
Up Regulated	Down Regulated
26472	177
7153	2167
11014	7123
991	6943
3161	11170
9133	762
94081	7010
10360	125
10112	11095
4320	9806
7083	2273
54733	256949
55165	9079
999	5175
9833	51751
27242	948
9601	2327
55143	857
30001	10894
4173	58494
7076	51208
259266	1003
9055	2869
6491	55679
6790	1910
1300	1901
8318	1036
3856	2823
9212	5348
6513	33
890	28984
1063	4239
11065	2662
64151	79987
1111	7049
3832	51267
83461	1675
2118	53826
22974	55273
9787	2690
891	8676
6696	94
51203	51705
7272	6457
332	2277
11004	64174
1277	7134
27293	6711
1001	474344
1382	5787
29028	10351
64798	2294
24137	283298
1033	55340
1301	8434
699	6445
2305	7450
81620	8547
3833	22918
55765	51285
55355	4242
6804	2824
51361	29091
4751	10974
80178	3043
7058	10268
29984	54922
56649	8639
2161	1346
6676	81563
2524	2264
9401	9457
23213	10516
10874	8436
51659	55022
10024	2949
3149	3730
55872	7122
3706	63876
26575	8613
9245	9459
2525	9452
26585	10266
80164	8406
7262	54674
8140	858
10381	25928
1281	154
9028	53405
1290	3316
1951	361
4318	9413
2861	27074
6447	25890
27286	9535
5307	1776
89944	6586
2810	284
1917	23492
56521	1410
1278	26577
1469	124
9071	79686
50512	79825
9319	6867
1365	8685
347735	9353
1311	4005
4321	6622
25803	185
10643	55303
4312	8425
1356	11326
6690	64321
51557	1043
94025	6237
9547	590
6286	23645
7104	5376
	1305
	1066
	1361
	10203
	2878
	2719
	9754
	5730
	9365
	7056
	2159
	57188
	51393
	7102
	4129
	2206
	53346
	29995
	79974
	55282
	2852
	284119
	140597
	5734
	8839
	2034
	9314
	2615
	389136
	26353
	10810
	7111
	1593
	11197
	8404
	1839
	55118
	27147
	22915
	6403
	10186
	7433
	2791
	58189
	79927
	55321
	2819
	80704
	51673
	728
	79652
	1580
	6387
	1359
	9912
	9254
	1012
	6440
	730
	1805
	2532
	6532
	2941
	4499
	6368
	316
	4118
	216
	9308
	9839
	10365
	1674
	1318
	4091
	3398
	2357
	23604
	8630
	5319
	80761
	3202
	57088
	2219
	2624
	2171
	83604
	695
	241
	2202
	820
	10319
	23266
	3055
	21
	79901
	4688
	84617
	203
	7305
	5745
	845
	11027
	4023
	56729
	7078
	6441
	84981
	6505
	9510
	1264
	4629
	4332
	126393
	4008
	712
	3397
	8835
	65055
	6274
	79413
	1634
	6590
	3575
	945
	760
	4973
	2328
	2354
	5225
	1959
	4616
	1441
	9450
	57165
	7177
	5166
	3820
	55214
	10871
	3399
	54345
	969
	55081
	27063
	10223
	84830
	5552
	366
	2920
	6279
	2207
	951
	79887
	7356
	4256
	3553
	3569
	6578
	7832
	9022
	7538
	440712
	22854
	64116
	3047
	306
	4818
	2210
	3067
	713
	79625
	6366
	157869
	6275
	5179
	7704
	732
	72
	4069
	54
	1667
	2352
	6439
	358
	6347
	2947
	6456
	79645
	249
	1511
	51316
	6348
	3489
	13
	3248
	722

## Sheet: IIIB-control
Up Regulated	Down Regulated
27178	177
6804	2167
7498	7123
56649	125
30001	6943
51280	1910
4320	948
2525	1003
6676	11170
6513	28984
3783	762
6712	857
8714	2273
5099	9079
1362	2824
55200	5175
27242	10351
8821	1036
26499	51751
1001	9806
1301	1901
6696	11095
768	7450
10538	2823
7264	284
7153	2869
1300	2277
79644	5787
5214	3043
27286	2719
4486	7134
2528	8406
80176	7049
2810	4239
6526	58494
1277	2294
124222	55273
79814	2327
4321	5348
79586	54922
991	7075
7262	7010
23213	2690
9123	1675
131566	51705
3673	8639
22974	51208
7058	33
65108	8613
3856	53346
3359	847
55876	57188
11015	9457
9133	23037
50506	55679
2118	8676
26255	27074
2026	8436
7039	10894
376267	10516
56913	55022
5352	2009
55165	2791
10874	1346
25987	11197
3706	10186
3918	10974
7083	53826
25803	7122
9833	3730
1829	9365
11065	8727
5328	2662
3161	90865
54866	3399
1281	216
1290	760
629	185
10112	25928
1356	1580
64798	8547
7298	53905
6690	6440
23321	2264
23624	84981
4600	6867
11004	54674
259266	10266
2161	51285
891	26577
10158	1839
1594	64174
5003	3202
2191	9353
	22918
	10810
	29091
	1066
	8404
	361
	9254
	4628
	256949
	83604
	10268
	2034
	6622
	7102
	7056
	53405
	55118
	4499
	2878
	29995
	4005
	56271
	389136
	64321
	79987
	4023
	4851
	9510
	51232
	730
	3384
	5980
	22998
	140597
	91851
	9839
	9413
	1410
	23266
	23492
	8991
	2171
	1012
	51309
	590
	1361
	10365
	7466
	79762
	6457
	7111
	2624
	4008
	26353
	3400
	2701
	22915
	1776
	5376
	79652
	23328
	55084
	9314
	687
	79413
	9912
	5225
	1674
	10319
	1028
	728
	80761
	2206
	8685
	5319
	2202
	203
	10203
	54996
	154
	5587
	2
	6446
	4616
	858
	1359
	79901
	2354
	23462
	51673
	3777
	6368
	7433
	55282
	21
	5730
	6403
	1959
	1843
	8630
	2532
	7538
	65055
	3398
	56994
	3131
	80704
	5950
	1043
	55214
	4118
	5166
	25840
	4629
	11326
	23705
	1441
	1490
	316

## Sheet: IV-control
Up Regulated	Down Regulated
23246	177
26472	6943
991	2167
4282	7010
4830	125
891	51751
332	9079
7083	7123
220134	58494
471	5175
10460	2273
6712	1901
9401	2327
9768	1003
1773	51267
55143	10894
9133	51705
23539	11170
7153	1910
2161	11095
55215	28984
790	8436
79019	4239
22974	33
9123	5787
6182	762
81620	217
29984	64174
9787	10516
11065	5797
6513	2034
1111	22918
1468	9459
8318	10351
30001	154
84823	1036
6768	948
253782	5348
7076	4628
55723	8676
4171	6867
54478	27244
899	8404
80178	9457
2237	55273
7272	256949
54972	2277
9582	857
11004	283298
23170	2949
1063	2662
9212	7049
9055	10186
10609	847
78999	2690
1951	3730
55355	25959
7079	79987
79000	9365
51087	4023
9074	8613
4173	22998
25987	2823
6790	54922
3838	8434
1058	2294
6676	55679
51659	23328
9088	51208
3049	687
6804	2824
79814	5166
9928	284
79007	23710
2118	8630
3833	2206
1690	8322
51512	23037
4318	10203
890	2869
3856	1359
2861	84981
638	8639
4751	27074
9833	1842
10058	79901
4647	57188
55771	2114
6491	54674
78995	79652
6241	2624
5881	4242
10381	590
3005	10266
2305	7078
64151	57447
580	3202
5471	1012
2146	7450
116832	53346
27237	361
547	7075
1163	5376
5214	55340
50512	9912
55040	5549
23624	94
2810	8839
4320	4973
1033	1346
6696	79686
147841	1776
55165	57088
26575	858
8811	1410
24137	53826
55200	9452
10112	3373
55765	2791
55224	1305
3161	6457
51203	6445
56992	9728
56649	4005
1829	1318
898	9254
5307	25928
4312	8406
5328	81563
4744	5319
27242	9839
7298	22915
83461	29995
699	51090
10024	1839
89944	9353
376267	64321
1356	10974
9427	1634
7345	1675
4157	3316
7262	6586
54894	8547
80164	389136
1277	760
8140	7122
1365	90865
9232	10268
3783	1580
3149	7056
2786	1361
79586	57134
4321	4128
7137	3043
56675	1043
1001	29091
1294	316
259266	4129
1469	83604
55872	4499
2306	51285
11226	53405
148229	26353
7138	55303
2877	9413
7425	728
64220	4256
1515	79974
2525	8991
1870	730
23475	10346
56660	8835
3706	216
23532	6368
1382	1808
10721	55022
83715	10810
3486	3399
79962	6403
3934	55282
10643	7832
1728	54996
1311	9510
9319	2358
7058	11197
8337	3201
5794	1066
10551	3575
25907	51232
1048	55081
6286	91851
57834	7433
3006	3777
57817	55118
6447	4629
5003	8490
3880	2295
10874	11037
9245	140597
5268	8685
25789	10365
3485	845
4608	2878
3866	3708
183	25890
6947	51309
	23462
	58189
	3131
	2532
	695
	6505
	11309
	58526
	5638
	2202
	11326
	6387
	2719
	3122
	83468
	64116
	79899
	27295
	9037
	1794
	2219
	2328
	5225
	124
	56994
	25840
	9060
	1805
	358
	7177
	7111
	11076
	1326
	203
	1843
	55214
	11010
	1264
	23266
	80761
	241
	6532
	3490
	7704
	5168
	2348
	1674
	8809
	11027
	29931
	945
	1524
	79148
	26577
	4008
	3398
	5730
	4332
	79625
	79927
	81575
	5783
	56729
	6275
	6565
	10418
	3977
	6440
	4091
	6578
	7538
	10875
	3815
	969
	5552
	55332
	22854
	11213
	10319
	951
	1959
	366
	26471
	7113
	7305
	1604
	440712
	7356
	150094
	820
	2619
	7102
	2162
	10678
	21
	2920
	54345
	56892
	6439
	5997
	13
	5507
	221395
	6098
	6338
	249
	7134
	732
	1511
	2357
	72
	729
	4069
	3248
	306
	51316
	3047
	6279
	1667
	650
	5284
