# Supplementary material for: Identification of Hub Genes, Modules and Metabolic Pathways Associated With Lung Adenocarcinoma: A System Biology Approach
Source: Research Square preprint supplement (doi:10.21203/rs.3.rs-111252/v1), 2020-11-30
Supplement: Supplementary file 8 [file 78e98a1034774a0376c23f6b.xlsx]

## Sheet: Total
Category	ID	Name	Source	p-value	q-value Bonferroni	q-value FDR B&H	q-value FDR B&Y	Hit Count in Query List	Hit Count in Genome	Hit in Query List
GO: Molecular Function	GO:0008201	heparin binding		3.118e-08	2.008e-05	2.008e-05	0.0001415	12	180	ADAMTS1,HBEGF,ADAMTS8,TGFBR3,SLIT2,THBS2,ANOS1,AGER,LPL,PCOLCE2,CLEC3B,CCL23
GO: Molecular Function	GO:0005539	glycosaminoglycan binding		1.268e-07	8.167e-05	4.084e-05	0.0002877	13	246	ADAMTS1,HBEGF,ADAMTS8,TGFBR3,SLIT2,LYVE1,THBS2,ANOS1,AGER,LPL,PCOLCE2,CLEC3B,CCL23
GO: Molecular Function	GO:1901681	sulfur compound binding		5.368e-07	0.0003457	0.0001152	0.000812	13	279	ACADL,ADAMTS1,HBEGF,ADAMTS8,TGFBR3,SLIT2,THBS2,ANOS1,AGER,LPL,PCOLCE2,CLEC3B,CCL23
GO: Molecular Function	GO:0001605	adrenomedullin receptor activity		2.158e-06	0.00139	0.0002748	0.001936	3	4	RAMP2,RAMP3,CALCRL
GO: Molecular Function	GO:0005201	extracellular matrix structural constituent		2.181e-06	0.001405	0.0002748	0.001936	10	178	FBLN5,VWF,MMRN1,SLIT2,MFAP4,THBS2,ANOS1,PCOLCE2,SRPX,COL1A1
GO: Molecular Function	GO:0005509	calcium ion binding		2.56e-06	0.001649	0.0002748	0.001936	20	734	FBLN5,CRTAC1,MELK,SVEP1,MMRN1,CD93,SLIT2,THBD,THBS2,LPL,AOC3,PLA2G1B,CLEC3B,SPARCL1,TNNC1,MMP12,CDH3,CDH5,DNASE1L3,CDH13
GO: Molecular Function	GO:0001540	amyloid-beta binding		6.345e-06	0.004086	0.0005837	0.004113	7	85	RAMP3,BCHE,CRYAB,ADRB2,AGER,CD36,MARCO
GO: Molecular Function	GO:0097642	calcitonin family receptor activity		1.854e-05	0.01194	0.001493	0.01052	3	7	RAMP2,RAMP3,CALCRL
GO: Molecular Function	GO:0046983	protein dimerization activity		6.436e-05	0.04144	0.00401	0.02825	28	1557	FBLN5,VWF,TCF21,SFTPC,PECAM1,AOX1,SOX17,ID3,CAV1,CAV2,JAM2,CRYAB,GHR,SLIT2,RASIP1,STX1A,ADRB2,CD36,LPL,AOC3,TNNC1,VEGFD,CDH3,CDH5,TOP2A,HSPB8,EPAS1,CDH13
GO: Molecular Function	GO:1990409	adrenomedullin binding		6.751e-05	0.04348	0.00401	0.02825	2	2	RAMP2,CALCRL
GO: Molecular Function	GO:0042802	identical protein binding		6.849e-05	0.04411	0.00401	0.02825	33	1997	CLDN18,FBLN5,VWF,SFTPC,PECAM1,SH3GL3,AOX1,BCHE,CAV1,CAV2,AQP4,SLC2A1,CRYAB,GHR,SLIT2,DES,RASIP1,STX1A,ADRB2,TK1,AGER,LPL,AOC3,CLDN5,TNNC1,VEGFD,CDH3,CDH5,TOP2A,HSPB8,CDH13,SFN,COL1A1
GO: Molecular Function	GO:0019955	cytokine binding		0.0001046	0.06739	0.005616	0.03957	8	176	SOSTDC1,ZFP36,GHR,TGFBR3,AGER,CD36,CCL23,ACKR1
GO: Molecular Function	GO:0017046	peptide hormone binding		0.0001327	0.08548	0.006576	0.04633	5	60	VIPR1,RAMP2,EDNRB,GHR,CALCRL
GO: Molecular Function	GO:0042803	protein homodimerization activity		0.0002631	0.1695	0.01173	0.08263	20	1019	FBLN5,VWF,SFTPC,PECAM1,AOX1,CAV2,CRYAB,GHR,SLIT2,RASIP1,ADRB2,LPL,AOC3,TNNC1,VEGFD,CDH3,CDH5,TOP2A,HSPB8,CDH13
GO: Molecular Function	GO:0005172	vascular endothelial growth factor receptor binding		0.000281	0.1809	0.01173	0.08263	3	16	ANGPT1,VEGFD,CDH5
GO: Molecular Function	GO:0042277	peptide binding		0.0002914	0.1876	0.01173	0.08263	12	441	VIPR1,RAMP2,RAMP3,BCHE,EDNRB,CRYAB,GHR,ADRB2,AGER,CD36,CALCRL,MARCO
GO: Molecular Function	GO:0033218	amide binding		0.000336	0.2164	0.01273	0.08968	13	515	VIPR1,RAMP2,RAMP3,ACADL,BCHE,EDNRB,CRYAB,GHR,ADRB2,AGER,CD36,CALCRL,MARCO
GO: Molecular Function	GO:0097643	amylin receptor activity		0.0003974	0.2559	0.01347	0.09491	2	4	RAMP2,RAMP3
GO: Molecular Function	GO:0097644	calcitonin family binding		0.0003974	0.2559	0.01347	0.09491	2	4	RAMP2,CALCRL
GO: Molecular Function	GO:0005504	fatty acid binding		0.0005011	0.3227	0.01614	0.1137	4	45	ID3,PTGDS,FABP4,CD36
GO: Molecular Function	GO:0042562	hormone binding		0.0005352	0.3447	0.01634	0.1152	7	171	VIPR1,RAMP2,EDNRB,GHR,ALDH1A1,CALCRL,CDH13
GO: Molecular Function	GO:0001846	opsonin binding		0.0005583	0.3596	0.01634	0.1152	3	20	VSIG4,CD93,C5AR1
GO: Molecular Function	GO:0033293	monocarboxylic acid binding		0.0006407	0.4126	0.01794	0.1264	5	84	ID3,PTGDS,FABP4,CD36,PLA2G1B
GO: Molecular Function	GO:0005198	structural molecule activity		0.0006908	0.4449	0.01854	0.1306	16	779	CLDN18,FBLN5,VWF,CAV1,CAV2,CRYAB,MMRN1,SLIT2,DES,MFAP4,THBS2,ANOS1,PCOLCE2,CLDN5,SRPX,COL1A1
GO: Molecular Function	GO:0005102	signaling receptor binding		0.0008055	0.5187	0.02075	0.1462	28	1815	FBLN5,VWF,ANGPT1,TCF21,SPP1,HBEGF,CRTAC1,ADAMTS8,CAV1,CAV2,PHLDA2,GDF10,S1PR1,EDNRB,FABP4,NMU,TGFBR3,SLIT2,KL,ADRB2,CD36,LPL,WIF1,PLA2G1B,CCL23,VEGFD,CDH5,MARCO
GO: Molecular Function	GO:0004672	protein kinase activity		0.001118	0.7201	0.02728	0.1922	22	1315	PMP22,ANGPT1,PDK4,GRK5,RGCC,SOSTDC1,CAV1,TEK,MELK,FABP4,ITPKA,GHR,TGFBR3,RASIP1,ADRB2,MS4A2,CCNB2,AGER,PLA2G1B,C5AR1,HSPB8,SFN
GO: Molecular Function	GO:0004016	adenylate cyclase activity		0.001181	0.7604	0.02728	0.1922	8	253	RAMP2,RAMP3,GRK5,S1PR1,EDNRB,ADRB2,CALCRL,MARCO
GO: Molecular Function	GO:0019957	C-C chemokine binding		0.001228	0.791	0.02728	0.1922	3	26	ZFP36,CCL23,ACKR1
GO: Molecular Function	GO:0001848	complement binding		0.001228	0.791	0.02728	0.1922	3	26	VSIG4,CD93,C5AR1
GO: Molecular Function	GO:0016301	kinase activity		0.001591	1	0.0341	0.2402	25	1621	PMP22,ANGPT1,PDK4,GRK5,RGCC,SOSTDC1,CAV1,TEK,MELK,LDB2,FABP4,ITPKA,GHR,TGFBR3,RASIP1,ADRB2,MS4A2,TK1,CCNB2,AGER,PLA2G1B,C5AR1,ALDH1A1,HSPB8,SFN
GO: Molecular Function	GO:0016773	phosphotransferase activity, alcohol group as acceptor		0.001641	1	0.0341	0.2402	23	1444	PMP22,ANGPT1,PDK4,GRK5,RGCC,SOSTDC1,CAV1,TEK,MELK,FABP4,ITPKA,GHR,TGFBR3,RASIP1,ADRB2,MS4A2,CCNB2,AGER,PLA2G1B,C5AR1,ALDH1A1,HSPB8,SFN
GO: Molecular Function	GO:0043177	organic acid binding		0.002104	1	0.03933	0.2771	9	342	ID3,PTGDS,FABP4,LYVE1,ADRB2,P3H2,CD36,PLA2G1B,HBB
GO: Molecular Function	GO:0046914	transition metal ion binding		0.002226	1	0.03933	0.2771	19	1125	CDO1,ADAMTS1,CYP4B1,AOX1,GATA2,CP,CPA3,CPB2,ADAMTS8,ADH1B,MT1M,TK1,P3H2,AOC3,MMP11,MMP12,EPAS1,CA2,CA4
GO: Molecular Function	GO:0005080	protein kinase C binding		0.002242	1	0.03933	0.2771	4	67	GRK5,TOP2A,CAVIN2,SFN
GO: Molecular Function	GO:0008237	metallopeptidase activity		0.002244	1	0.03933	0.2771	7	219	ADAMTS1,CPA3,CPB2,ADAMTS8,DPEP2,MMP11,MMP12
GO: Molecular Function	GO:0009975	cyclase activity		0.002282	1	0.03933	0.2771	8	281	RAMP2,RAMP3,GRK5,S1PR1,EDNRB,ADRB2,CALCRL,MARCO
GO: Molecular Function	GO:0016849	phosphorus-oxygen lyase activity		0.002282	1	0.03933	0.2771	8	281	RAMP2,RAMP3,GRK5,S1PR1,EDNRB,ADRB2,CALCRL,MARCO
GO: Molecular Function	GO:0043184	vascular endothelial growth factor receptor 2 binding		0.002321	1	0.03933	0.2771	2	9	VEGFD,CDH5
GO: Molecular Function	GO:0016772	transferase activity, transferring phosphorus-containing groups		0.002426	1	0.04007	0.2823	27	1859	PMP22,ANGPT1,PDK4,GRK5,RGCC,SOSTDC1,CAV1,TEK,MELK,ZFP36,LDB2,FABP4,ITPKA,GHR,TGFBR3,RASIP1,ADRB2,MS4A2,TK1,CCNB2,AGER,PLA2G1B,C5AR1,ALDH1A1,TOP2A,HSPB8,SFN
GO: Biological Process	GO:0001944	vasculature development		4.47e-13	1.838e-09	1.269e-09	1.129e-08	32	884	RAMP2,RAMP3,ANGPT1,TCF21,TMEM204,ADAMTS1,HBEGF,PECAM1,RGCC,GATA2,SOX17,CAV1,TEK,S1PR1,HOXA5,TGFBR3,SLIT2,RASIP1,THBS2,ADRB2,PTPRB,GPC3,CD36,C5AR1,CALCRL,VEGFD,TMEM100,CDH5,EPAS1,CDH13,FOXF1,COL1A1
GO: Biological Process	GO:0001568	blood vessel development		8.788e-13	3.613e-09	1.269e-09	1.129e-08	31	849	RAMP2,RAMP3,ANGPT1,TCF21,ADAMTS1,HBEGF,PECAM1,RGCC,GATA2,SOX17,CAV1,TEK,S1PR1,HOXA5,TGFBR3,SLIT2,RASIP1,THBS2,ADRB2,PTPRB,GPC3,CD36,C5AR1,CALCRL,VEGFD,TMEM100,CDH5,EPAS1,CDH13,FOXF1,COL1A1
GO: Biological Process	GO:0042127	regulation of cell population proliferation		1.045e-12	4.296e-09	1.269e-09	1.129e-08	47	1921	PMP22,VIPR1,ANGPT1,ADAMTS1,HBEGF,GRK5,RGCC,VSIG4,GATA2,SOX17,ETV4,BCHE,CPB2,ADAMTS8,CAV1,CAV2,PHLDA2,TEK,PTGDS,S1PR1,ZFP36,EDNRB,FABP4,LIMS2,HOXA5,TGFBR3,SLIT2,RASIP1,ADRB2,GPC3,P3H2,AGER,ASPM,PLA2G1B,SRPX,C5AR1,CALCRL,CDC20,CCL23,MMP12,VEGFD,CDH3,CDH5,PID1,CDH13,FOXF1,SFN
GO: Biological Process	GO:0001525	angiogenesis		1.376e-12	5.658e-09	1.269e-09	1.129e-08	27	645	RAMP2,RAMP3,ANGPT1,TCF21,ADAMTS1,HBEGF,PECAM1,RGCC,GATA2,SOX17,CAV1,TEK,S1PR1,HOXA5,SLIT2,RASIP1,THBS2,ADRB2,PTPRB,CD36,C5AR1,CALCRL,VEGFD,TMEM100,CDH5,EPAS1,CDH13
GO: Biological Process	GO:0048514	blood vessel morphogenesis		1.543e-12	6.345e-09	1.269e-09	1.129e-08	29	755	RAMP2,RAMP3,ANGPT1,TCF21,ADAMTS1,HBEGF,PECAM1,RGCC,GATA2,SOX17,CAV1,TEK,S1PR1,HOXA5,TGFBR3,SLIT2,RASIP1,THBS2,ADRB2,PTPRB,CD36,C5AR1,CALCRL,VEGFD,TMEM100,CDH5,EPAS1,CDH13,FOXF1
GO: Biological Process	GO:0007155	cell adhesion		7.125e-12	2.929e-08	4.832e-09	4.3e-08	40	1509	PMP22,CLDN18,GPM6B,FBLN5,VWF,ANGPT1,SPP1,PECAM1,RGCC,VSIG4,CAV1,TEK,AQP4,S1PR1,SVEP1,JAM2,LIMS2,MMRN1,CD93,SLIT2,LYVE1,MFAP4,THBS2,ANOS1,ADRB2,FAM107A,STXBP6,AGER,CD36,AOC3,CLDN5,SPARCL1,SRPX,MMP12,HBB,CDH3,CDH5,CDH13,FOXF1,COL1A1
GO: Biological Process	GO:0022610	biological adhesion		8.227e-12	3.382e-08	4.832e-09	4.3e-08	40	1516	PMP22,CLDN18,GPM6B,FBLN5,VWF,ANGPT1,SPP1,PECAM1,RGCC,VSIG4,CAV1,TEK,AQP4,S1PR1,SVEP1,JAM2,LIMS2,MMRN1,CD93,SLIT2,LYVE1,MFAP4,THBS2,ANOS1,ADRB2,FAM107A,STXBP6,AGER,CD36,AOC3,CLDN5,SPARCL1,SRPX,MMP12,HBB,CDH3,CDH5,CDH13,FOXF1,COL1A1
GO: Biological Process	GO:0003013	circulatory system process		2.625e-11	1.079e-07	1.349e-08	1.2e-07	25	624	RAMP2,RAMP3,ANGPT1,CACNA2D2,CES1,HBEGF,FXYD6,CPA3,CAV1,TEK,EDNRB,NMU,TGFBR3,SLIT2,DES,KL,ADRB2,AGER,CD36,AOC3,TNNC1,HBB,FXYD1,CDH5,EPAS1
GO: Biological Process	GO:0050678	regulation of epithelial cell proliferation		3.619e-11	1.488e-07	1.506e-08	1.34e-07	21	433	ANGPT1,RGCC,GATA2,ETV4,CPB2,CAV1,CAV2,TEK,ZFP36,EDNRB,LIMS2,HOXA5,TGFBR3,GPC3,AGER,C5AR1,MMP12,VEGFD,CDH3,CDH13,SFN
GO: Biological Process	GO:0035239	tube morphogenesis		3.663e-11	1.506e-07	1.506e-08	1.34e-07	32	1045	RAMP2,RAMP3,ANGPT1,TCF21,ADAMTS1,HBEGF,PECAM1,RGCC,GATA2,SOX17,ETV4,SOSTDC1,CAV1,TEK,S1PR1,HOXA5,TGFBR3,SLIT2,RASIP1,THBS2,ADRB2,PTPRB,GPC3,CD36,C5AR1,CALCRL,VEGFD,TMEM100,CDH5,EPAS1,CDH13,FOXF1
GO: Biological Process	GO:0008015	blood circulation		1.171e-10	4.815e-07	4.377e-08	3.895e-07	24	615	RAMP2,ANGPT1,CACNA2D2,CES1,HBEGF,FXYD6,CPA3,CAV1,TEK,EDNRB,NMU,TGFBR3,SLIT2,DES,KL,ADRB2,AGER,CD36,AOC3,TNNC1,HBB,FXYD1,CDH5,EPAS1
GO: Biological Process	GO:0072359	circulatory system development		2.046e-10	8.41e-07	7.009e-08	6.237e-07	35	1322	RAMP2,RAMP3,ANGPT1,TCF21,TMEM204,ADAMTS1,HBEGF,PECAM1,RGCC,GATA2,SOX17,ID3,CAV1,TEK,S1PR1,HOXA5,TGFBR3,SLIT2,RASIP1,THBS2,ADRB2,PTPRB,GPC3,CD36,CLDN5,C5AR1,CALCRL,TNNC1,VEGFD,TMEM100,CDH5,EPAS1,CDH13,FOXF1,COL1A1
GO: Biological Process	GO:0035295	tube development		3.315e-10	1.363e-06	1.048e-07	9.329e-07	34	1276	CLDN18,RAMP2,RAMP3,ANGPT1,TCF21,ADAMTS1,HBEGF,PECAM1,RGCC,GATA2,SOX17,ETV4,SOSTDC1,CAV1,TEK,S1PR1,EDNRB,HOXA5,TGFBR3,SLIT2,RASIP1,THBS2,ADRB2,PTPRB,GPC3,CD36,C5AR1,CALCRL,VEGFD,TMEM100,CDH5,EPAS1,CDH13,FOXF1
GO: Biological Process	GO:0050673	epithelial cell proliferation		5.065e-10	2.082e-06	1.487e-07	1.323e-06	21	500	ANGPT1,RGCC,GATA2,ETV4,CPB2,CAV1,CAV2,TEK,ZFP36,EDNRB,LIMS2,HOXA5,TGFBR3,GPC3,AGER,C5AR1,MMP12,VEGFD,CDH3,CDH13,SFN
GO: Biological Process	GO:0051094	positive regulation of developmental process		4.102e-09	1.686e-05	1.124e-06	1e-05	37	1632	GPM6B,RAMP2,CACNA2D2,ADAMTS1,RGCC,SH3GL3,WASF3,GATA2,SOX17,TEK,GDF10,ZFP36,ITPKA,LIMS2,GHR,HOXA5,TGFBR3,SLIT2,THBS2,LRRN3,KL,ADRB2,AGER,CD36,LPL,WIF1,ASPM,CLDN5,C5AR1,ADIRF,CDC20,VEGFD,TMEM100,CDH5,CA2,SFN,COL1A1
GO: Biological Process	GO:0051241	negative regulation of multicellular organismal process		5.719e-09	2.351e-05	1.469e-06	1.308e-05	35	1500	PMP22,CLDN18,ANGPT1,ADAMTS1,SPP1,RGCC,VSIG4,GATA2,SOX17,ETV4,ID3,SOSTDC1,CPB2,CAV1,TEK,PTGDS,GDF10,AQP4,ZFP36,EDNRB,NMU,LIMS2,HOXA5,TGFBR3,SLIT2,THBD,THBS2,ADRB2,LMO2,AGER,CD36,ASPM,ALDH1A1,CALCRL,CDH3
GO: Biological Process	GO:0048646	anatomical structure formation involved in morphogenesis		7.229e-09	2.972e-05	1.748e-06	1.556e-05	33	1365	PMP22,KRT8,RAMP2,RAMP3,ANGPT1,TCF21,ADAMTS1,HBEGF,PECAM1,RGCC,GATA2,SOX17,CAV1,TEK,S1PR1,HOXA5,TGFBR3,SLIT2,RASIP1,THBS2,ADRB2,PTPRB,GPC3,CD36,C5AR1,CALCRL,VEGFD,TMEM100,CDH5,EPAS1,CDH13,FOXF1,COL1A1
GO: Biological Process	GO:1901652	response to peptide		2.425e-08	9.968e-05	5.538e-06	4.928e-05	20	565	CDO1,RAMP3,PDK4,CAV1,CAV2,TEK,SLC2A1,EDNRB,GHR,TGFBR3,KL,ADRB2,AGER,CD36,LPL,PLA2G1B,MMP12,PID1,CA2,COL1A1
GO: Biological Process	GO:0009719	response to endogenous stimulus		2.764e-08	0.0001136	5.981e-06	5.322e-05	38	1834	CDO1,ABCA3,RAMP2,RAMP3,TCF21,SPP1,PDK4,SOSTDC1,BCHE,CAV1,CAV2,TEK,GDF10,SLC2A1,ZFP36,EDNRB,CRYAB,GHR,TGFBR3,SLIT2,ANOS1,KL,ADRB2,GPC3,FAM107A,LMO2,AGER,CD36,LPL,PLA2G1B,CLDN5,CLEC3B,TMEM100,CDH5,PID1,CDH13,CA2,COL1A1
GO: Biological Process	GO:0055080	cation homeostasis		3.74e-08	0.0001538	7.689e-06	6.842e-05	24	825	CD52,RAMP3,PDK4,GATA2,CP,CAV1,S1PR1,EDNRB,NMU,MT1M,KL,ADRB2,MS4A2,AGER,CD36,PLA2G1B,C5AR1,C7,CCL23,FXYD1,CDH5,EPAS1,CA2,CA4
GO: Biological Process	GO:0098771	inorganic ion homeostasis		5.016e-08	0.0002062	9.735e-06	8.663e-05	24	838	CD52,RAMP3,PDK4,GATA2,CP,CAV1,S1PR1,EDNRB,NMU,MT1M,KL,ADRB2,MS4A2,AGER,CD36,PLA2G1B,C5AR1,C7,CCL23,FXYD1,CDH5,EPAS1,CA2,CA4
GO: Biological Process	GO:0050801	ion homeostasis		5.594e-08	0.00023	9.735e-06	8.663e-05	25	909	CD52,RAMP3,PDK4,GATA2,CP,CAV1,S1PR1,EDNRB,NMU,MT1M,KL,ADRB2,MS4A2,AGER,CD36,PLA2G1B,C5AR1,C7,CCL23,FHL1,FXYD1,CDH5,EPAS1,CA2,CA4
GO: Biological Process	GO:0048871	multicellular organismal homeostasis		5.62e-08	0.0002311	9.735e-06	8.663e-05	19	537	CLDN18,ACADL,SPP1,PDK4,GATA2,CAV1,AQP4,S1PR1,EDNRB,LDB2,FABP4,NMU,ADRB2,CD36,ALDH1A1,CDH3,EPAS1,CA2,SFN
GO: Biological Process	GO:0061061	muscle structure development		5.683e-08	0.0002336	9.735e-06	8.663e-05	23	779	PMP22,KRT8,RAMP2,ANGPT1,TCF21,TMEM204,CACNA2D2,HBEGF,SOX17,ID3,SOSTDC1,CAV1,CAV2,S1PR1,EDNRB,CRYAB,TGFBR3,DES,ADRB2,TNNC1,FHL1,EPAS1,FOXF1
GO: Biological Process	GO:0031589	cell-substrate adhesion		7.437e-08	0.0003057	1.223e-05	0.0001088	16	384	GPM6B,FBLN5,VWF,ANGPT1,SPP1,PECAM1,TEK,LIMS2,MMRN1,LYVE1,FAM107A,CD36,MMP12,CDH13,FOXF1,COL1A1
GO: Biological Process	GO:0033993	response to lipid		8.934e-08	0.0003673	1.413e-05	0.0001257	26	1000	CDO1,ABCA3,RAMP2,RAMP3,TCF21,SPP1,PDK4,GATA2,ID3,BCHE,CAV1,TEK,ZFP36,EDNRB,CRYAB,GHR,TGFBR3,SLIT2,THBD,FAM107A,CD36,LPL,C5AR1,PID1,CA2,COL1A1
GO: Biological Process	GO:1901700	response to oxygen-containing compound		9.408e-08	0.0003868	1.432e-05	0.0001275	37	1839	CLDN18,CDO1,KRT8,FBLN5,RAMP2,RAMP3,SPP1,PDK4,GPX3,ID3,BCHE,CPB2,CAV1,CAV2,TEK,AQP4,SLC2A1,ZFP36,EDNRB,CRYAB,GHR,TGFBR3,SLIT2,THBD,KL,ADRB2,AGER,CD36,LPL,PLA2G1B,C5AR1,CALCRL,MMP12,HBB,PID1,CA2,COL1A1
GO: Biological Process	GO:0001570	vasculogenesis		1.122e-07	0.0004611	1.647e-05	0.0001465	9	101	RAMP2,ANGPT1,SOX17,CAV1,TEK,TGFBR3,RASIP1,TMEM100,FOXF1
GO: Biological Process	GO:0048878	chemical homeostasis		1.928e-07	0.0007925	2.733e-05	0.0002432	30	1334	CD52,RAMP3,PDK4,GATA2,CP,CPB2,CAV1,AQP4,S1PR1,EDNRB,FABP4,NMU,MT1M,KL,ADRB2,MS4A2,AGER,CD36,LPL,PLA2G1B,C5AR1,C7,CCL23,FHL1,FXYD1,CDH5,EPAS1,CA2,SFN,CA4
GO: Biological Process	GO:0009725	response to hormone		2.877e-07	0.001183	3.845e-05	0.0003421	26	1062	CDO1,ABCA3,RAMP2,RAMP3,TCF21,SPP1,PDK4,BCHE,CAV1,CAV2,TEK,SLC2A1,ZFP36,EDNRB,CRYAB,GHR,TGFBR3,SLIT2,KL,FAM107A,LMO2,LPL,PLA2G1B,PID1,CA2,COL1A1
GO: Biological Process	GO:0016477	cell migration		2.899e-07	0.001192	3.845e-05	0.0003421	35	1757	PMP22,GPM6A,ANGPT1,ADAMTS1,SPP1,HBEGF,PECAM1,RGCC,GATA2,SOX17,CAV1,PHLDA2,TEK,S1PR1,EDNRB,LDB2,JAM2,HOXA5,TGFBR3,SLIT2,THBD,GPC3,FAM107A,AGER,AOC3,ASPM,PLA2G1B,C5AR1,CCL23,MMP12,VEGFD,CDH5,CDH13,FOXF1,COL1A1
GO: Biological Process	GO:0008285	negative regulation of cell population proliferation		3.243e-07	0.001333	4.166e-05	0.0003707	23	859	PMP22,ADAMTS1,RGCC,VSIG4,GATA2,ETV4,BCHE,CPB2,ADAMTS8,CAV1,CAV2,PTGDS,LIMS2,TGFBR3,SLIT2,GPC3,P3H2,AGER,SRPX,CCL23,CDH5,CDH13,SFN
GO: Biological Process	GO:0006954	inflammatory response		4.261e-07	0.001752	5.308e-05	0.0004724	22	805	PMP22,CDO1,SPP1,TEK,ZFP36,EDNRB,FABP4,SLIT2,KL,ADRB2,MS4A2,AGER,CD36,LPL,AOC3,C5AR1,CALCRL,CCL23,ACKR1,CDH5,DNASE1L3,FOXF1
GO: Biological Process	GO:0055065	metal ion homeostasis		4.445e-07	0.001827	5.375e-05	0.0004783	21	741	CD52,RAMP3,GATA2,CP,CAV1,S1PR1,EDNRB,NMU,MT1M,KL,ADRB2,MS4A2,AGER,CD36,PLA2G1B,C5AR1,C7,CCL23,FXYD1,CDH5,EPAS1
GO: Biological Process	GO:0055095	lipoprotein particle mediated signaling		4.954e-07	0.002037	5.657e-05	0.0005034	3	3	CD36,LPL,CDH13
GO: Biological Process	GO:0055096	low-density lipoprotein particle mediated signaling		4.954e-07	0.002037	5.657e-05	0.0005034	3	3	CD36,LPL,CDH13
GO: Biological Process	GO:0008284	positive regulation of cell population proliferation		5.251e-07	0.002159	5.834e-05	0.0005192	26	1096	VIPR1,ADAMTS1,HBEGF,GRK5,GATA2,CAV1,CAV2,TEK,S1PR1,EDNRB,FABP4,TGFBR3,RASIP1,ADRB2,AGER,ASPM,PLA2G1B,C5AR1,CALCRL,CDC20,MMP12,VEGFD,CDH3,PID1,CDH13,FOXF1
GO: Biological Process	GO:0043062	extracellular structure organization		6.753e-07	0.002776	7.305e-05	0.0006501	17	510	PMP22,GPM6B,FBLN5,VWF,RAMP2,SPP1,PECAM1,RGCC,CPB2,JAM2,MFAP4,CD36,LPL,MMP11,MMP12,FOXF1,COL1A1
GO: Biological Process	GO:0030198	extracellular matrix organization		7.169e-07	0.002947	7.556e-05	0.0006724	15	399	PMP22,GPM6B,FBLN5,VWF,RAMP2,SPP1,PECAM1,RGCC,CPB2,JAM2,MFAP4,MMP11,MMP12,FOXF1,COL1A1
GO: Biological Process	GO:0051093	negative regulation of developmental process		7.825e-07	0.003217	8e-05	0.0007119	27	1194	PMP22,CLDN18,ADAMTS1,SPP1,RGCC,GATA2,SOX17,ETV4,ID3,SOSTDC1,CPB2,CAV1,TEK,GDF10,ZFP36,EDNRB,LIMS2,HOXA5,TGFBR3,SLIT2,THBS2,ADRB2,LMO2,CD36,ASPM,MMP11,CDH3
GO: Biological Process	GO:0046903	secretion		7.979e-07	0.00328	8e-05	0.0007119	35	1834	CDO1,FBLN5,VWF,ANGPT1,CACNA2D2,SPP1,PECAM1,RGCC,GATA2,CPB2,CAV1,TEK,SLC2A1,EDNRB,NMU,MMRN1,CD93,CFD,STX1A,ADRB2,PTPRB,MS4A2,STXBP6,AGER,CD36,LPL,PLA2G1B,CLEC3B,C5AR1,MMP12,HBB,STX11,VEGFD,FOXF1,CA2
GO: Biological Process	GO:0032101	regulation of response to external stimulus		8.76e-07	0.003601	8.574e-05	0.000763	27	1201	PMP22,SPP1,VSIG4,CPB2,CAV1,TEK,PGC,S1PR1,ZFP36,EDNRB,FABP4,SLIT2,THBD,ADRB2,AGER,CD36,LPL,AOC3,C5AR1,CALCRL,MMP12,VEGFD,CDH5,MARCO,DNASE1L3,CDH13,FOXF1
GO: Biological Process	GO:0034329	cell junction assembly		9.202e-07	0.003783	8.798e-05	0.0007829	12	254	PMP22,GPM6B,RAMP2,PECAM1,CAV1,TEK,LIMS2,FAM107A,CLDN5,CDH3,CDH5,CDH13
GO: Biological Process	GO:0072507	divalent inorganic cation homeostasis		9.873e-07	0.004059	9.225e-05	0.0008209	18	585	CD52,RAMP3,GATA2,CAV1,S1PR1,EDNRB,NMU,MT1M,KL,ADRB2,MS4A2,AGER,CD36,PLA2G1B,C5AR1,CCL23,FXYD1,CDH5
GO: Biological Process	GO:0050900	leukocyte migration		1.269e-06	0.005216	0.0001159	0.001031	17	534	ANGPT1,SPP1,PECAM1,CAV1,TEK,S1PR1,EDNRB,JAM2,SLIT2,THBD,AGER,AOC3,PLA2G1B,C5AR1,CCL23,VEGFD,COL1A1
GO: Biological Process	GO:0055074	calcium ion homeostasis		1.515e-06	0.006227	0.0001354	0.001205	17	541	CD52,RAMP3,GATA2,CAV1,S1PR1,EDNRB,NMU,KL,ADRB2,MS4A2,AGER,CD36,PLA2G1B,C5AR1,CCL23,FXYD1,CDH5
GO: Biological Process	GO:0040017	positive regulation of locomotion		1.898e-06	0.007803	0.000166	0.001477	19	677	ANGPT1,ADAMTS1,HBEGF,PECAM1,GATA2,CAV1,CAV2,TEK,S1PR1,SLIT2,FAM107A,AGER,AOC3,C5AR1,VEGFD,CDH5,CDH13,FOXF1,COL1A1
GO: Biological Process	GO:1990410	adrenomedullin receptor signaling pathway		1.955e-06	0.008035	0.0001674	0.00149	3	4	RAMP2,RAMP3,CALCRL
GO: Biological Process	GO:0009611	response to wounding		2.456e-06	0.0101	0.0002061	0.001834	20	756	VWF,SPP1,HBEGF,PECAM1,GATA2,ID3,CPB2,CAV1,ZFP36,MMRN1,LYVE1,THBD,ADRB2,AGER,CD36,MMP12,HBB,CDH3,FOXF1,COL1A1
GO: Biological Process	GO:0050680	negative regulation of epithelial cell proliferation		2.547e-06	0.01047	0.0002086	0.001856	10	187	RGCC,ETV4,CPB2,CAV1,CAV2,LIMS2,TGFBR3,GPC3,AGER,SFN
GO: Biological Process	GO:0051674	localization of cell		2.639e-06	0.01085	0.0002086	0.001856	35	1932	PMP22,GPM6A,ANGPT1,ADAMTS1,SPP1,HBEGF,PECAM1,RGCC,GATA2,SOX17,CAV1,PHLDA2,TEK,S1PR1,EDNRB,LDB2,JAM2,HOXA5,TGFBR3,SLIT2,THBD,GPC3,FAM107A,AGER,AOC3,ASPM,PLA2G1B,C5AR1,CCL23,MMP12,VEGFD,CDH5,CDH13,FOXF1,COL1A1
GO: Biological Process	GO:0048870	cell motility		2.639e-06	0.01085	0.0002086	0.001856	35	1932	PMP22,GPM6A,ANGPT1,ADAMTS1,SPP1,HBEGF,PECAM1,RGCC,GATA2,SOX17,CAV1,PHLDA2,TEK,S1PR1,EDNRB,LDB2,JAM2,HOXA5,TGFBR3,SLIT2,THBD,GPC3,FAM107A,AGER,AOC3,ASPM,PLA2G1B,C5AR1,CCL23,MMP12,VEGFD,CDH5,CDH13,FOXF1,COL1A1
GO: Biological Process	GO:0071363	cellular response to growth factor stimulus		2.823e-06	0.01161	0.000219	0.001949	20	763	RAMP2,ANGPT1,TMEM204,SOSTDC1,CAV1,CAV2,TEK,GDF10,ZFP36,TGFBR3,SLIT2,ANOS1,KL,GPC3,CLDN5,CLEC3B,VEGFD,TMEM100,CDH5,COL1A1
GO: Biological Process	GO:0010810	regulation of cell-substrate adhesion		3.151e-06	0.01296	0.0002399	0.002135	11	237	GPM6B,SPP1,TEK,LIMS2,MMRN1,FAM107A,CD36,MMP12,CDH13,FOXF1,COL1A1
GO: Biological Process	GO:0010243	response to organonitrogen compound		3.281e-06	0.01349	0.0002452	0.002182	25	1133	CDO1,RAMP3,PDK4,BCHE,CAV1,CAV2,TEK,SLC2A1,EDNRB,GHR,TGFBR3,SLIT2,THBD,KL,ADRB2,AGER,CD36,LPL,PLA2G1B,C5AR1,MMP12,PID1,CDH13,CA2,COL1A1
GO: Biological Process	GO:0042325	regulation of phosphorylation		3.366e-06	0.01384	0.0002471	0.002199	33	1781	PMP22,RAMP3,ANGPT1,HBEGF,PECAM1,RGCC,COX7A1,CAV1,CAV2,TEK,GDF10,EDNRB,LDB2,FABP4,GHR,TGFBR3,SLIT2,RASIP1,LRRN3,KL,ADRB2,MS4A2,CCNB2,AGER,CD36,PLA2G1B,C5AR1,CCL23,VEGFD,CDH5,MARCO,PID1,SFN
GO: Biological Process	GO:0071495	cellular response to endogenous stimulus		3.868e-06	0.0159	0.0002782	0.002476	30	1541	RAMP2,RAMP3,TCF21,SPP1,PDK4,SOSTDC1,CAV1,CAV2,GDF10,ZFP36,GHR,TGFBR3,SLIT2,ANOS1,KL,ADRB2,GPC3,FAM107A,LMO2,AGER,CD36,LPL,PLA2G1B,CLDN5,CLEC3B,TMEM100,CDH5,PID1,CA2,COL1A1
GO: Biological Process	GO:0001932	regulation of protein phosphorylation		3.925e-06	0.01614	0.0002782	0.002476	31	1625	PMP22,RAMP3,ANGPT1,HBEGF,PECAM1,RGCC,CAV1,CAV2,TEK,GDF10,EDNRB,FABP4,GHR,TGFBR3,SLIT2,RASIP1,LRRN3,KL,ADRB2,MS4A2,CCNB2,AGER,CD36,PLA2G1B,C5AR1,CCL23,VEGFD,CDH5,MARCO,PID1,SFN
GO: Biological Process	GO:0055082	cellular chemical homeostasis		4.256e-06	0.01749	0.0002965	0.002639	22	926	CD52,RAMP3,GATA2,CP,CPB2,CAV1,AQP4,S1PR1,EDNRB,NMU,MT1M,ADRB2,MS4A2,AGER,CD36,PLA2G1B,C5AR1,C7,CCL23,FXYD1,CDH5,CA2
GO: Biological Process	GO:0051050	positive regulation of transport		4.741e-06	0.01949	0.0003248	0.002891	25	1157	RAMP3,ANGPT1,SPP1,RGCC,GATA2,CPB2,CAV1,TEK,EDNRB,NMU,STX1A,ADRB2,MS4A2,GPC3,AGER,CD36,LPL,AOC3,PLA2G1B,MMP12,FHL1,FXYD1,CDH3,CA2,SFN
GO: Biological Process	GO:0070848	response to growth factor		5.124e-06	0.02106	0.0003354	0.002984	20	794	RAMP2,ANGPT1,TMEM204,SOSTDC1,CAV1,CAV2,TEK,GDF10,ZFP36,TGFBR3,SLIT2,ANOS1,KL,GPC3,CLDN5,CLEC3B,VEGFD,TMEM100,CDH5,COL1A1
GO: Biological Process	GO:0009887	animal organ morphogenesis		5.129e-06	0.02108	0.0003354	0.002984	26	1240	ANGPT1,TCF21,ADAMTS1,GATA2,SOX17,ETV4,ID3,SOSTDC1,CPB2,CAV1,PHLDA2,TEK,S1PR1,LIMS2,HOXA5,TGFBR3,SLIT2,CLIC5,GPC3,CLDN5,TNNC1,FHL1,TMEM100,FOXF1,CA2,COL1A1
GO: Biological Process	GO:0006875	cellular metal ion homeostasis		5.14e-06	0.02113	0.0003354	0.002984	18	658	CD52,RAMP3,GATA2,CP,CAV1,S1PR1,EDNRB,NMU,MT1M,ADRB2,MS4A2,CD36,PLA2G1B,C5AR1,C7,CCL23,FXYD1,CDH5
GO: Biological Process	GO:0060429	epithelium development		5.297e-06	0.02178	0.0003403	0.003028	29	1483	KRT8,ANGPT1,TCF21,CES1,HBEGF,PECAM1,SOX17,ETV4,ID3,SOSTDC1,CAV1,TEK,S1PR1,ZFP36,LDB2,HOXA5,TGFBR3,SLIT2,RASIP1,CLIC5,GPC3,CLDN5,MMP12,CDH3,TMEM100,CDH5,FOXF1,CA2,SFN
GO: Biological Process	GO:0045444	fat cell differentiation		5.46e-06	0.02245	0.0003453	0.003073	11	251	GRK5,GATA2,GDF10,ZFP36,FABP4,ADRB2,LPL,WIF1,ADIRF,MMP11,PID1
GO: Biological Process	GO:0030003	cellular cation homeostasis		6.106e-06	0.0251	0.000377	0.003355	19	734	CD52,RAMP3,GATA2,CP,CAV1,S1PR1,EDNRB,NMU,MT1M,ADRB2,MS4A2,CD36,PLA2G1B,C5AR1,C7,CCL23,FXYD1,CDH5,CA2
GO: Biological Process	GO:0050727	regulation of inflammatory response		6.144e-06	0.02526	0.000377	0.003355	14	416	PMP22,TEK,ZFP36,EDNRB,FABP4,SLIT2,ADRB2,AGER,LPL,AOC3,CALCRL,CDH5,DNASE1L3,FOXF1
GO: Biological Process	GO:0007517	muscle organ development		6.738e-06	0.0277	0.0004074	0.003625	15	479	PMP22,ANGPT1,TCF21,HBEGF,SOX17,ID3,CAV1,CAV2,S1PR1,CRYAB,TGFBR3,DES,ADRB2,TNNC1,FHL1
GO: Biological Process	GO:0043434	response to peptide hormone		6.908e-06	0.0284	0.0004096	0.003645	15	480	CDO1,PDK4,CAV1,CAV2,TEK,SLC2A1,EDNRB,GHR,TGFBR3,KL,LPL,PLA2G1B,PID1,CA2,COL1A1
GO: Biological Process	GO:0034330	cell junction organization		6.974e-06	0.02867	0.0004096	0.003645	12	309	PMP22,GPM6B,RAMP2,PECAM1,CAV1,TEK,LIMS2,FAM107A,CLDN5,CDH3,CDH5,CDH13
GO: Biological Process	GO:0008217	regulation of blood pressure		7.144e-06	0.02937	0.0004136	0.003681	10	210	RAMP2,CES1,CPA3,EDNRB,NMU,KL,ADRB2,CD36,AOC3,HBB
GO: Biological Process	GO:0006952	defense response		7.473e-06	0.03072	0.0004267	0.003797	33	1849	PMP22,CDO1,SPP1,VSIG4,CAV1,TEK,FCN3,AQP4,PGC,ZFP36,EDNRB,FABP4,SLIT2,CFD,KL,ADRB2,MS4A2,AGER,CD36,LPL,AOC3,PLA2G1B,C5AR1,C7,CALCRL,CCL23,MMP12,STX11,ACKR1,CDH5,MARCO,DNASE1L3,FOXF1
GO: Biological Process	GO:0006873	cellular ion homeostasis		7.985e-06	0.03282	0.0004497	0.004001	19	748	CD52,RAMP3,GATA2,CP,CAV1,S1PR1,EDNRB,NMU,MT1M,ADRB2,MS4A2,CD36,PLA2G1B,C5AR1,C7,CCL23,FXYD1,CDH5,CA2
GO: Biological Process	GO:0030335	positive regulation of cell migration		8.704e-06	0.03578	0.0004835	0.004303	17	617	ANGPT1,ADAMTS1,HBEGF,PECAM1,GATA2,CAV1,TEK,S1PR1,FAM107A,AGER,AOC3,C5AR1,VEGFD,CDH5,CDH13,FOXF1,COL1A1
GO: Biological Process	GO:0045216	cell-cell junction organization		8.885e-06	0.03653	0.000487	0.004334	9	170	PMP22,RAMP2,PECAM1,CAV1,LIMS2,CLDN5,CDH3,CDH5,CDH13
GO: Biological Process	GO:0003018	vascular process in circulatory system		9.524e-06	0.03915	0.0005104	0.004542	10	217	RAMP2,ANGPT1,CAV1,TEK,EDNRB,TGFBR3,SLIT2,ADRB2,HBB,CDH5
GO: Biological Process	GO:0016050	vesicle organization		9.561e-06	0.0393	0.0005104	0.004542	32	1784	VWF,RAMP2,RAMP3,ANGPT1,PECAM1,SH3GL3,GATA2,CAV1,CAV2,FCN3,GHR,MMRN1,CD93,CFD,STX1A,ADRB2,PTPRB,MS4A2,GPC3,STXBP6,AGER,CD36,CLEC3B,SRPX,C5AR1,CALCRL,HBB,STX11,VEGFD,MARCO,CDH13,FOXF1
GO: Biological Process	GO:0030334	regulation of cell migration		9.857e-06	0.04052	0.0005195	0.004623	23	1052	ANGPT1,ADAMTS1,HBEGF,PECAM1,RGCC,GATA2,CAV1,PHLDA2,TEK,S1PR1,LDB2,TGFBR3,SLIT2,FAM107A,AGER,AOC3,C5AR1,MMP12,VEGFD,CDH5,CDH13,FOXF1,COL1A1
GO: Biological Process	GO:0007043	cell-cell junction assembly		1.004e-05	0.04129	0.0005216	0.004642	8	131	PMP22,RAMP2,PECAM1,CAV1,CLDN5,CDH3,CDH5,CDH13
GO: Biological Process	GO:0072503	cellular divalent inorganic cation homeostasis		1.015e-05	0.04173	0.0005216	0.004642	16	559	CD52,RAMP3,GATA2,CAV1,S1PR1,EDNRB,NMU,MT1M,ADRB2,MS4A2,CD36,PLA2G1B,C5AR1,CCL23,FXYD1,CDH5
GO: Biological Process	GO:0048771	tissue remodeling		1.117e-05	0.04592	0.0005578	0.004963	10	221	CLDN18,SPP1,PDK4,CAV1,S1PR1,TGFBR3,ADRB2,AGER,EPAS1,CA2
GO: Biological Process	GO:0032963	collagen metabolic process		1.122e-05	0.04615	0.0005578	0.004963	8	133	RGCC,TGFBR3,MFAP4,P3H2,AGER,MMP11,MMP12,COL1A1
GO: Biological Process	GO:0098609	cell-cell adhesion		1.135e-05	0.04665	0.0005578	0.004963	21	911	CLDN18,PECAM1,RGCC,VSIG4,CAV1,TEK,AQP4,JAM2,LIMS2,CD93,SLIT2,ADRB2,STXBP6,AGER,CLDN5,SPARCL1,HBB,CDH3,CDH5,CDH13,FOXF1
GO: Biological Process	GO:0001667	ameboidal-type cell migration		1.149e-05	0.04722	0.0005578	0.004963	15	501	PMP22,ANGPT1,HBEGF,PECAM1,RGCC,GATA2,SOX17,TEK,EDNRB,TGFBR3,SLIT2,GPC3,AGER,MMP12,CDH13
GO: Biological Process	GO:0051270	regulation of cellular component movement		1.167e-05	0.04797	0.0005578	0.004963	25	1219	ANGPT1,ADAMTS1,HBEGF,PECAM1,RGCC,GATA2,CAV1,PHLDA2,TEK,S1PR1,LDB2,TGFBR3,SLIT2,FAM107A,AGER,AOC3,C5AR1,TNNC1,MMP12,FXYD1,VEGFD,CDH5,CDH13,FOXF1,COL1A1
GO: Biological Process	GO:1901698	response to nitrogen compound		1.167e-05	0.04797	0.0005578	0.004963	25	1219	CDO1,RAMP3,PDK4,BCHE,CAV1,CAV2,TEK,SLC2A1,EDNRB,GHR,TGFBR3,SLIT2,THBD,KL,ADRB2,AGER,CD36,LPL,PLA2G1B,C5AR1,MMP12,PID1,CDH13,CA2,COL1A1
GO: Biological Process	GO:1904019	epithelial cell apoptotic process		1.186e-05	0.04875	0.0005603	0.004986	8	134	KRT8,RAMP2,ANGPT1,RGCC,GATA2,TEK,ZFP36,AGER
GO: Biological Process	GO:0001659	temperature homeostasis		1.229e-05	0.05053	0.0005743	0.00511	9	177	ACADL,CAV1,EDNRB,FABP4,NMU,ADRB2,CD36,ALDH1A1,EPAS1
GO: Biological Process	GO:0030155	regulation of cell adhesion		1.362e-05	0.056	0.0006292	0.005599	19	777	GPM6B,ANGPT1,SPP1,RGCC,VSIG4,CAV1,TEK,S1PR1,JAM2,LIMS2,MMRN1,ADRB2,FAM107A,AGER,CD36,MMP12,CDH13,FOXF1,COL1A1
GO: Biological Process	GO:0140352	export from cell		1.384e-05	0.05688	0.0006309	0.005614	31	1730	VWF,ANGPT1,CACNA2D2,SPP1,PECAM1,RGCC,GATA2,CPB2,TEK,SLC2A1,NMU,MMRN1,CD93,CFD,STX1A,ADRB2,PTPRB,MS4A2,STXBP6,AGER,CD36,LPL,PLA2G1B,CLEC3B,C5AR1,MMP12,HBB,STX11,FXYD1,VEGFD,FOXF1
GO: Biological Process	GO:0019220	regulation of phosphate metabolic process		1.397e-05	0.05743	0.0006309	0.005614	34	1994	PMP22,RAMP3,ANGPT1,PDK4,HBEGF,PECAM1,RGCC,COX7A1,CAV1,CAV2,TEK,GDF10,EDNRB,LDB2,FABP4,GHR,TGFBR3,SLIT2,RASIP1,LRRN3,KL,ADRB2,MS4A2,CCNB2,AGER,CD36,PLA2G1B,C5AR1,CCL23,VEGFD,CDH5,MARCO,PID1,SFN
GO: Biological Process	GO:0051174	regulation of phosphorus metabolic process		1.412e-05	0.05804	0.0006309	0.005614	34	1995	PMP22,RAMP3,ANGPT1,PDK4,HBEGF,PECAM1,RGCC,COX7A1,CAV1,CAV2,TEK,GDF10,EDNRB,LDB2,FABP4,GHR,TGFBR3,SLIT2,RASIP1,LRRN3,KL,ADRB2,MS4A2,CCNB2,AGER,CD36,PLA2G1B,C5AR1,CCL23,VEGFD,CDH5,MARCO,PID1,SFN
GO: Biological Process	GO:2000147	positive regulation of cell motility		1.514e-05	0.06224	0.0006679	0.005944	17	644	ANGPT1,ADAMTS1,HBEGF,PECAM1,GATA2,CAV1,TEK,S1PR1,FAM107A,AGER,AOC3,C5AR1,VEGFD,CDH5,CDH13,FOXF1,COL1A1
GO: Biological Process	GO:2000351	regulation of endothelial cell apoptotic process		1.527e-05	0.06278	0.0006679	0.005944	6	67	RAMP2,ANGPT1,RGCC,GATA2,TEK,AGER
GO: Biological Process	GO:0031347	regulation of defense response		1.674e-05	0.06882	0.0007196	0.006404	20	861	PMP22,VSIG4,CAV1,TEK,PGC,ZFP36,EDNRB,FABP4,SLIT2,ADRB2,AGER,CD36,LPL,AOC3,CALCRL,MMP12,CDH5,MARCO,DNASE1L3,FOXF1
GO: Biological Process	GO:0097646	calcitonin family receptor signaling pathway		1.68e-05	0.06908	0.0007196	0.006404	3	7	RAMP2,RAMP3,CALCRL
GO: Biological Process	GO:0045597	positive regulation of cell differentiation		1.933e-05	0.07946	0.0008152	0.007254	24	1176	RAMP2,ADAMTS1,RGCC,SH3GL3,GATA2,SOX17,GDF10,ZFP36,ITPKA,LIMS2,HOXA5,SLIT2,AGER,CD36,LPL,WIF1,ASPM,CLDN5,ADIRF,TMEM100,CDH5,CA2,SFN,COL1A1
GO: Biological Process	GO:0006874	cellular calcium ion homeostasis		1.943e-05	0.07989	0.0008152	0.007254	15	524	CD52,RAMP3,GATA2,CAV1,S1PR1,EDNRB,NMU,ADRB2,MS4A2,CD36,PLA2G1B,C5AR1,CCL23,FXYD1,CDH5
GO: Biological Process	GO:0043114	regulation of vascular permeability		1.99e-05	0.08182	0.0008265	0.007355	5	42	RAMP2,ANGPT1,TEK,SLIT2,CDH5
GO: Biological Process	GO:0097435	supramolecular fiber organization		2.051e-05	0.08432	0.0008432	0.007504	18	729	KRT8,FBLN5,PECAM1,RGCC,WASF3,CAV1,S1PR1,CRYAB,SLIT2,DES,MFAP4,FAM107A,CD36,KANK3,PLA2G1B,MMP11,CDH5,COL1A1
GO: Biological Process	GO:0032940	secretion by cell		2.137e-05	0.08787	0.00087	0.007742	30	1682	VWF,ANGPT1,CACNA2D2,SPP1,PECAM1,RGCC,GATA2,CPB2,TEK,SLC2A1,NMU,MMRN1,CD93,CFD,STX1A,ADRB2,PTPRB,MS4A2,STXBP6,AGER,CD36,LPL,PLA2G1B,CLEC3B,C5AR1,MMP12,HBB,STX11,VEGFD,FOXF1
GO: Biological Process	GO:0048754	branching morphogenesis of an epithelial tube		2.162e-05	0.08889	0.0008714	0.007755	9	190	ANGPT1,TCF21,ETV4,TEK,HOXA5,SLIT2,RASIP1,GPC3,FOXF1
GO: Biological Process	GO:0072577	endothelial cell apoptotic process		2.314e-05	0.09513	0.0009167	0.008157	6	72	RAMP2,ANGPT1,RGCC,GATA2,TEK,AGER
GO: Biological Process	GO:0003007	heart morphogenesis		2.325e-05	0.09559	0.0009167	0.008157	11	293	ANGPT1,ADAMTS1,SOX17,TEK,S1PR1,TGFBR3,SLIT2,CLDN5,TNNC1,TMEM100,FOXF1
GO: Biological Process	GO:1904035	regulation of epithelial cell apoptotic process		2.341e-05	0.09625	0.0009167	0.008157	7	107	RAMP2,ANGPT1,RGCC,GATA2,TEK,ZFP36,AGER
GO: Biological Process	GO:0051272	positive regulation of cellular component movement		2.413e-05	0.09919	0.0009358	0.008327	17	668	ANGPT1,ADAMTS1,HBEGF,PECAM1,GATA2,CAV1,TEK,S1PR1,FAM107A,AGER,AOC3,C5AR1,VEGFD,CDH5,CDH13,FOXF1,COL1A1
GO: Biological Process	GO:0001936	regulation of endothelial cell proliferation		2.549e-05	0.1048	0.0009793	0.008715	9	194	ANGPT1,RGCC,GATA2,CAV1,CAV2,TEK,AGER,VEGFD,CDH13
GO: Biological Process	GO:2000145	regulation of cell motility		2.666e-05	0.1096	0.001005	0.008947	23	1120	ANGPT1,ADAMTS1,HBEGF,PECAM1,RGCC,GATA2,CAV1,PHLDA2,TEK,S1PR1,LDB2,TGFBR3,SLIT2,FAM107A,AGER,AOC3,C5AR1,MMP12,VEGFD,CDH5,CDH13,FOXF1,COL1A1
GO: Biological Process	GO:0015670	carbon dioxide transport		2.673e-05	0.1099	0.001005	0.008947	3	8	AQP4,CA2,CA4
GO: Biological Process	GO:0051480	regulation of cytosolic calcium ion concentration		2.69e-05	0.1106	0.001005	0.008947	13	413	CD52,RAMP3,GATA2,CAV1,S1PR1,EDNRB,NMU,ADRB2,MS4A2,CD36,PLA2G1B,C5AR1,FXYD1
GO: Biological Process	GO:0040012	regulation of locomotion		2.791e-05	0.1148	0.001034	0.0092	24	1203	ANGPT1,ADAMTS1,HBEGF,PECAM1,RGCC,GATA2,CAV1,CAV2,PHLDA2,TEK,S1PR1,LDB2,TGFBR3,SLIT2,FAM107A,AGER,AOC3,C5AR1,MMP12,VEGFD,CDH5,CDH13,FOXF1,COL1A1
GO: Biological Process	GO:0007167	enzyme linked receptor protein signaling pathway		2.819e-05	0.1159	0.001035	0.009207	23	1124	ANGPT1,TMEM204,PDK4,HBEGF,SOSTDC1,CAV1,CAV2,TEK,GDF10,GHR,TGFBR3,ANOS1,KL,ADRB2,GPC3,CLDN5,VEGFD,CDH3,TMEM100,CDH5,PID1,CDH13,COL1A1
GO: Biological Process	GO:0015669	gas transport		3.015e-05	0.1239	0.001097	0.009761	4	23	AQP4,HBB,CA2,CA4
GO: Biological Process	GO:0007204	positive regulation of cytosolic calcium ion concentration		3.447e-05	0.1417	0.001243	0.01106	12	363	CD52,RAMP3,GATA2,CAV1,S1PR1,EDNRB,NMU,ADRB2,MS4A2,CD36,PLA2G1B,C5AR1
GO: Biological Process	GO:0045453	bone resorption		3.658e-05	0.1504	0.001308	0.01164	6	78	CLDN18,SPP1,PDK4,S1PR1,ADRB2,CA2
GO: Biological Process	GO:0014070	response to organic cyclic compound		3.878e-05	0.1594	0.00137	0.01219	22	1068	CDO1,ABCA3,RAMP2,RAMP3,TCF21,SPP1,ID3,BCHE,CAV1,CAV2,TEK,ZFP36,EDNRB,CRYAB,GHR,SLIT2,THBD,FAM107A,CD36,FOXF1,CA2,COL1A1
GO: Biological Process	GO:1990845	adaptive thermogenesis		3.899e-05	0.1603	0.00137	0.01219	8	158	ACADL,CAV1,FABP4,ADRB2,CLIC5,CD36,ALDH1A1,EPAS1
GO: Biological Process	GO:0006897	endocytosis		4.13e-05	0.1698	0.001439	0.01281	18	769	RAMP2,RAMP3,ANGPT1,SH3GL3,GATA2,CAV1,CAV2,FCN3,GHR,STX1A,ADRB2,GPC3,AGER,CD36,CALCRL,HBB,MARCO,CDH13
GO: Biological Process	GO:0032102	negative regulation of response to external stimulus		4.7e-05	0.1932	0.001624	0.01445	13	436	SPP1,VSIG4,CPB2,TEK,ZFP36,SLIT2,THBD,ADRB2,AGER,CALCRL,MMP12,CDH5,FOXF1
GO: Biological Process	GO:0001935	endothelial cell proliferation		4.739e-05	0.1948	0.001624	0.01445	9	210	ANGPT1,RGCC,GATA2,CAV1,CAV2,TEK,AGER,VEGFD,CDH13
GO: Biological Process	GO:0010324	membrane invagination		4.881e-05	0.2007	0.001658	0.01476	18	779	RAMP2,RAMP3,ANGPT1,SH3GL3,GATA2,CAV1,CAV2,FCN3,GHR,STX1A,ADRB2,GPC3,AGER,CD36,CALCRL,HBB,MARCO,CDH13
GO: Biological Process	GO:0031348	negative regulation of defense response		4.953e-05	0.2036	0.001669	0.01485	10	263	VSIG4,TEK,ZFP36,SLIT2,ADRB2,AGER,CALCRL,MMP12,CDH5,FOXF1
GO: Biological Process	GO:0002697	regulation of immune effector process		5.038e-05	0.2071	0.001684	0.01498	14	503	ANGPT1,VSIG4,GATA2,CPB2,TEK,PGC,MS4A2,AGER,CD36,C5AR1,C7,MMP12,DNASE1L3,FOXF1
GO: Biological Process	GO:0019725	cellular homeostasis		5.113e-05	0.2102	0.001695	0.01508	22	1088	CD52,RAMP3,GATA2,CP,CPB2,CAV1,AQP4,S1PR1,EDNRB,NMU,MT1M,ADRB2,MS4A2,AGER,CD36,PLA2G1B,C5AR1,C7,CCL23,FXYD1,CDH5,CA2
GO: Biological Process	GO:0003015	heart process		5.189e-05	0.2133	0.001707	0.01519	11	320	RAMP3,CACNA2D2,HBEGF,FXYD6,CAV1,NMU,DES,ADRB2,TNNC1,FXYD1,EPAS1
GO: Biological Process	GO:0034762	regulation of transmembrane transport		5.332e-05	0.2192	0.001736	0.01545	16	641	RAMP3,CACNA2D2,FXYD6,CAV1,SLC2A1,ADRB2,CLIC5,MS4A2,GPC3,AGER,AOC3,PLA2G1B,FHL1,FXYD1,PID1,CA2
GO: Biological Process	GO:0001655	urogenital system development		5.362e-05	0.2204	0.001736	0.01545	12	380	ANGPT1,TCF21,ADAMTS1,PECAM1,GATA2,SOX17,ID3,TEK,SLIT2,GPC3,FOXF1,CA2
GO: Biological Process	GO:0001894	tissue homeostasis		5.799e-05	0.2384	0.001861	0.01656	10	268	CLDN18,SPP1,PDK4,GATA2,S1PR1,LDB2,ADRB2,CDH3,EPAS1,CA2
GO: Biological Process	GO:0002682	regulation of immune system process		5.84e-05	0.2401	0.001861	0.01656	30	1775	CLDN18,ANGPT1,PECAM1,RGCC,VSIG4,GATA2,CPB2,CAV1,TEK,FCN3,PGC,ZFP36,HOXA5,SLIT2,CFD,MS4A2,LMO2,AGER,CD36,AOC3,PLA2G1B,C5AR1,C7,MMP12,VEGFD,MARCO,DNASE1L3,FOXF1,CA2,COL1A1
GO: Biological Process	GO:0090287	regulation of cellular response to growth factor stimulus		6.131e-05	0.2521	0.001939	0.01725	11	326	ANGPT1,TMEM204,SOSTDC1,CAV1,CAV2,TEK,TGFBR3,SLIT2,GPC3,VEGFD,CDH5
GO: Biological Process	GO:0045124	regulation of bone resorption		6.258e-05	0.2573	0.001964	0.01748	5	53	CLDN18,SPP1,PDK4,S1PR1,CA2
GO: Biological Process	GO:0085029	extracellular matrix assembly		6.759e-05	0.2779	0.002074	0.01845	4	28	GPM6B,FBLN5,RGCC,MFAP4
GO: Biological Process	GO:0060343	trabecula formation		6.759e-05	0.2779	0.002074	0.01845	4	28	ADAMTS1,TEK,TGFBR3,COL1A1
GO: Biological Process	GO:0048732	gland development		6.759e-05	0.2779	0.002074	0.01845	14	517	CDO1,VWF,TCF21,GATA2,ETV4,SOSTDC1,CPB2,CAV1,LIMS2,HOXA5,TGFBR3,SLIT2,CCNB2,FOXF1
GO: Biological Process	GO:0061383	trabecula morphogenesis		6.853e-05	0.2817	0.002087	0.01857	5	54	ADAMTS1,TEK,S1PR1,TGFBR3,COL1A1
GO: Biological Process	GO:0010562	positive regulation of phosphorus metabolic process		7.181e-05	0.2952	0.002155	0.01918	24	1277	RAMP3,ANGPT1,HBEGF,PECAM1,RGCC,CAV1,CAV2,TEK,GDF10,EDNRB,GHR,LRRN3,KL,ADRB2,MS4A2,AGER,CD36,PLA2G1B,C5AR1,CCL23,VEGFD,CDH5,MARCO,PID1
GO: Biological Process	GO:0045937	positive regulation of phosphate metabolic process		7.181e-05	0.2952	0.002155	0.01918	24	1277	RAMP3,ANGPT1,HBEGF,PECAM1,RGCC,CAV1,CAV2,TEK,GDF10,EDNRB,GHR,LRRN3,KL,ADRB2,MS4A2,AGER,CD36,PLA2G1B,C5AR1,CCL23,VEGFD,CDH5,MARCO,PID1
GO: Biological Process	GO:0002576	platelet degranulation		7.386e-05	0.3036	0.002192	0.01951	7	128	VWF,PECAM1,MMRN1,CFD,CD36,CLEC3B,VEGFD
GO: Biological Process	GO:0072001	renal system development		7.413e-05	0.3048	0.002192	0.01951	11	333	ANGPT1,TCF21,ADAMTS1,PECAM1,SOX17,ID3,TEK,SLIT2,GPC3,FOXF1,CA2
GO: Biological Process	GO:0050927	positive regulation of positive chemotaxis		7.792e-05	0.3203	0.002288	0.02036	4	29	S1PR1,AGER,VEGFD,CDH13
GO: Biological Process	GO:0051046	regulation of secretion		8.151e-05	0.3351	0.002377	0.02115	20	964	ANGPT1,CACNA2D2,SPP1,RGCC,GATA2,CPB2,TEK,SLC2A1,EDNRB,NMU,STX1A,ADRB2,MS4A2,STXBP6,AGER,CD36,LPL,PLA2G1B,MMP12,FOXF1
GO: Biological Process	GO:0009628	response to abiotic stimulus		8.49e-05	0.349	0.002458	0.02187	25	1375	PMP22,KRT8,RAMP2,ACADL,RGCC,CPB2,CAV1,TEK,SLC2A1,NMU,CRYAB,TGFBR3,MFAP4,THBD,STX1A,ADRB2,AGER,CD36,LPL,ADIRF,VEGFD,HSPB8,EPAS1,CA2,COL1A1
GO: Biological Process	GO:0051047	positive regulation of secretion		8.623e-05	0.3545	0.002464	0.02193	14	529	SPP1,RGCC,GATA2,CPB2,TEK,EDNRB,NMU,STX1A,MS4A2,AGER,CD36,LPL,PLA2G1B,MMP12
GO: Biological Process	GO:0061138	morphogenesis of a branching epithelium		8.63e-05	0.3548	0.002464	0.02193	9	227	ANGPT1,TCF21,ETV4,TEK,HOXA5,SLIT2,RASIP1,GPC3,FOXF1
GO: Biological Process	GO:0032870	cellular response to hormone stimulus		8.87e-05	0.3647	0.002499	0.02224	17	742	RAMP2,RAMP3,TCF21,SPP1,PDK4,CAV1,CAV2,ZFP36,GHR,SLIT2,KL,FAM107A,LMO2,LPL,PLA2G1B,PID1,CA2
GO: Biological Process	GO:0031401	positive regulation of protein modification process		8.891e-05	0.3655	0.002499	0.02224	25	1379	RAMP3,ANGPT1,HBEGF,PECAM1,RGCC,CAV1,CAV2,TEK,GDF10,EDNRB,GHR,LRRN3,KL,ADRB2,MS4A2,FAM107A,AGER,CD36,PLA2G1B,C5AR1,CDC20,CCL23,VEGFD,CDH5,MARCO
GO: Biological Process	GO:0050926	regulation of positive chemotaxis		8.936e-05	0.3673	0.002499	0.02224	4	30	S1PR1,AGER,VEGFD,CDH13
GO: Biological Process	GO:1901342	regulation of vasculature development		9.013e-05	0.3705	0.002503	0.02228	13	465	RAMP2,ADAMTS1,RGCC,GATA2,TEK,HOXA5,THBS2,ADRB2,CD36,C5AR1,VEGFD,TMEM100,CDH5
GO: Biological Process	GO:1903530	regulation of secretion by cell		9.629e-05	0.3958	0.002642	0.02351	19	898	ANGPT1,CACNA2D2,SPP1,RGCC,GATA2,CPB2,TEK,SLC2A1,NMU,STX1A,ADRB2,MS4A2,STXBP6,AGER,CD36,LPL,PLA2G1B,MMP12,FOXF1
GO: Biological Process	GO:1904645	response to amyloid-beta		9.679e-05	0.3979	0.002642	0.02351	5	58	RAMP3,ADRB2,AGER,CD36,MMP12
GO: Biological Process	GO:0110148	biomineralization		9.768e-05	0.4016	0.002642	0.02351	8	180	GPM6B,SPP1,S1PR1,KL,ADRB2,GPC3,CLEC3B,COL1A1
GO: Biological Process	GO:0031214	biomineral tissue development		9.768e-05	0.4016	0.002642	0.02351	8	180	GPM6B,SPP1,S1PR1,KL,ADRB2,GPC3,CLEC3B,COL1A1
GO: Biological Process	GO:0070542	response to fatty acid		9.845e-05	0.4047	0.002645	0.02354	6	93	PDK4,ID3,TGFBR3,CD36,LPL,PID1
GO: Biological Process	GO:0001934	positive regulation of protein phosphorylation		0.0001013	0.4164	0.002678	0.02383	22	1140	RAMP3,ANGPT1,HBEGF,PECAM1,RGCC,CAV1,CAV2,TEK,GDF10,EDNRB,GHR,LRRN3,KL,ADRB2,MS4A2,AGER,CD36,PLA2G1B,C5AR1,CCL23,VEGFD,MARCO
GO: Biological Process	GO:0050679	positive regulation of epithelial cell proliferation		0.0001019	0.4189	0.002678	0.02383	9	232	GATA2,CAV1,CAV2,TEK,C5AR1,MMP12,VEGFD,CDH3,CDH13
GO: Biological Process	GO:0072012	glomerulus vasculature development		0.000102	0.4192	0.002678	0.02383	4	31	ANGPT1,TCF21,PECAM1,TEK
GO: Biological Process	GO:0060341	regulation of cellular localization		0.0001025	0.4215	0.002678	0.02383	21	1060	CLDN18,GPM6B,RAMP3,ANGPT1,GATA2,CAV1,CAV2,TEK,ZFP36,CRYAB,STX1A,ADRB2,MS4A2,GPC3,CD36,PLA2G1B,TNNC1,CDH3,PID1,FOXF1,SFN
GO: Biological Process	GO:0048545	response to steroid hormone		0.0001029	0.4231	0.002678	0.02383	12	407	CDO1,ABCA3,RAMP2,TCF21,SPP1,BCHE,CAV1,ZFP36,SLIT2,FAM107A,CA2,COL1A1
GO: Biological Process	GO:0097529	myeloid leukocyte migration		0.0001123	0.4618	0.002904	0.02584	9	235	SPP1,PECAM1,EDNRB,SLIT2,AGER,PLA2G1B,C5AR1,CCL23,VEGFD
GO: Biological Process	GO:1901653	cellular response to peptide		0.0001208	0.4964	0.003093	0.02753	12	414	PDK4,CAV1,CAV2,GHR,KL,ADRB2,AGER,CD36,LPL,PLA2G1B,PID1,CA2
GO: Biological Process	GO:0042060	wound healing		0.0001232	0.5066	0.003093	0.02753	15	617	VWF,HBEGF,PECAM1,GATA2,CPB2,CAV1,MMRN1,THBD,ADRB2,AGER,CD36,MMP12,HBB,CDH3,COL1A1
GO: Biological Process	GO:0032103	positive regulation of response to external stimulus		0.0001236	0.5083	0.003093	0.02753	16	689	CPB2,CAV1,PGC,S1PR1,FABP4,SLIT2,THBD,AGER,CD36,LPL,AOC3,C5AR1,MMP12,VEGFD,MARCO,CDH13
GO: Biological Process	GO:0010811	positive regulation of cell-substrate adhesion		0.000124	0.5096	0.003093	0.02753	7	139	SPP1,TEK,LIMS2,MMRN1,CD36,CDH13,FOXF1
GO: Biological Process	GO:0120162	positive regulation of cold-induced thermogenesis		0.0001243	0.5112	0.003093	0.02753	6	97	ACADL,CAV1,FABP4,ADRB2,CD36,EPAS1
GO: Biological Process	GO:0080134	regulation of response to stress		0.0001244	0.5113	0.003093	0.02753	28	1671	PMP22,FBLN5,SPP1,HBEGF,VSIG4,CPB2,CAV1,TEK,PGC,ZFP36,EDNRB,FABP4,CRYAB,TGFBR3,SLIT2,THBD,ADRB2,AGER,CD36,LPL,AOC3,CALCRL,MMP12,CDH5,MARCO,DNASE1L3,HSPB8,FOXF1
GO: Biological Process	GO:0050878	regulation of body fluid levels		0.0001249	0.5135	0.003093	0.02753	14	548	CDO1,VWF,GATA2,CPB2,CAV1,AQP4,EDNRB,MMRN1,THBD,ADRB2,CD36,HBB,SFN,COL1A1
GO: Biological Process	GO:0050728	negative regulation of inflammatory response		0.0001273	0.5232	0.003133	0.02788	8	187	TEK,ZFP36,SLIT2,ADRB2,AGER,CALCRL,CDH5,FOXF1
GO: Biological Process	GO:0061440	kidney vasculature development		0.000131	0.5384	0.003186	0.02835	4	33	ANGPT1,TCF21,PECAM1,TEK
GO: Biological Process	GO:0061437	renal system vasculature development		0.000131	0.5384	0.003186	0.02835	4	33	ANGPT1,TCF21,PECAM1,TEK
GO: Biological Process	GO:0007160	cell-matrix adhesion		0.0001402	0.5763	0.00339	0.03017	9	242	GPM6B,FBLN5,PECAM1,TEK,LYVE1,FAM107A,CD36,MMP12,CDH13
GO: Biological Process	GO:0045765	regulation of angiogenesis		0.0001412	0.5804	0.003394	0.0302	12	421	RAMP2,ADAMTS1,RGCC,GATA2,TEK,HOXA5,THBS2,ADRB2,CD36,C5AR1,VEGFD,CDH5
GO: Biological Process	GO:0046850	regulation of bone remodeling		0.0001438	0.5912	0.003437	0.03059	5	63	CLDN18,SPP1,PDK4,S1PR1,CA2
GO: Biological Process	GO:0120161	regulation of cold-induced thermogenesis		0.0001479	0.608	0.003494	0.0311	7	143	ACADL,CAV1,FABP4,ADRB2,CD36,ALDH1A1,EPAS1
GO: Biological Process	GO:0106106	cold-induced thermogenesis		0.0001479	0.608	0.003494	0.0311	7	143	ACADL,CAV1,FABP4,ADRB2,CD36,ALDH1A1,EPAS1
GO: Biological Process	GO:0070482	response to oxygen levels		0.0001541	0.6337	0.003621	0.03222	12	425	RAMP2,RGCC,CAV1,TEK,SLC2A1,CRYAB,TGFBR3,ADRB2,AGER,VEGFD,EPAS1,COL1A1
GO: Biological Process	GO:0098657	import into cell		0.0001558	0.6405	0.003639	0.03239	19	932	GPM6B,RAMP2,RAMP3,ANGPT1,SH3GL3,GATA2,CAV1,CAV2,FCN3,GHR,STX1A,ADRB2,GPC3,AGER,CD36,CALCRL,HBB,MARCO,CDH13
GO: Biological Process	GO:0006900	vesicle budding from membrane		0.000158	0.6497	0.003662	0.03259	18	855	RAMP2,RAMP3,ANGPT1,SH3GL3,GATA2,CAV1,CAV2,FCN3,GHR,STX1A,ADRB2,GPC3,AGER,CD36,CALCRL,HBB,MARCO,CDH13
GO: Biological Process	GO:0001763	morphogenesis of a branching structure		0.0001586	0.6519	0.003662	0.03259	9	246	ANGPT1,TCF21,ETV4,TEK,HOXA5,SLIT2,RASIP1,GPC3,FOXF1
GO: Biological Process	GO:0010941	regulation of cell death		0.0001594	0.6555	0.003662	0.03259	31	1969	PMP22,RAMP2,RAMP3,ANGPT1,SPP1,PDK4,GRK5,RGCC,GATA2,ID3,CAV1,TEK,GDF10,MELK,ZFP36,EDNRB,LIMS2,CRYAB,GHR,HOXA5,TGFBR3,SLIT2,ADRB2,AGER,CD36,LAMP3,SRPX,C5AR1,HBB,TOP2A,SFN
GO: Biological Process	GO:1903532	positive regulation of secretion by cell		0.0001608	0.6612	0.003673	0.03269	13	493	SPP1,RGCC,GATA2,CPB2,TEK,NMU,STX1A,MS4A2,AGER,CD36,LPL,PLA2G1B,MMP12
GO: Biological Process	GO:0045647	negative regulation of erythrocyte differentiation		0.0001678	0.6897	0.00381	0.03391	3	14	ZFP36,HOXA5,LMO2
GO: Biological Process	GO:0048729	tissue morphogenesis		0.0001698	0.6981	0.003836	0.03413	18	860	ANGPT1,TCF21,HBEGF,SOX17,ETV4,SOSTDC1,TEK,S1PR1,HOXA5,TGFBR3,SLIT2,RASIP1,GPC3,TNNC1,MMP12,TMEM100,FOXF1,CA2
GO: Biological Process	GO:0002684	positive regulation of immune system process		0.0001741	0.7159	0.003912	0.03481	23	1268	PECAM1,RGCC,VSIG4,GATA2,CPB2,CAV1,TEK,FCN3,PGC,HOXA5,CFD,MS4A2,AGER,CD36,AOC3,PLA2G1B,C5AR1,C7,MMP12,VEGFD,MARCO,FOXF1,CA2
GO: Biological Process	GO:0071345	cellular response to cytokine stimulus		0.0001825	0.7504	0.004078	0.03629	22	1188	CLDN18,KRT8,ANGPT1,SPP1,SOX17,CAV1,AQP4,S1PR1,ZFP36,FABP4,GHR,SLIT2,STX1A,CD36,PCOLCE2,CCL23,MMP12,STX11,ACKR1,PID1,FOXF1,COL1A1
GO: Biological Process	GO:0003331	positive regulation of extracellular matrix constituent secretion		0.000187	0.7689	0.004112	0.03659	2	3	RGCC,CPB2
GO: Biological Process	GO:0002086	diaphragm contraction		0.000187	0.7689	0.004112	0.03659	2	3	ADRB2,TNNC1
GO: Biological Process	GO:0060435	bronchiole development		0.000187	0.7689	0.004112	0.03659	2	3	TCF21,HOXA5
GO: Biological Process	GO:0060047	heart contraction		0.0001967	0.8087	0.004302	0.03828	10	311	CACNA2D2,HBEGF,FXYD6,CAV1,NMU,DES,ADRB2,TNNC1,FXYD1,EPAS1
GO: Biological Process	GO:0034332	adherens junction organization		0.0001987	0.817	0.004323	0.03847	7	150	GPM6B,RAMP2,TEK,FAM107A,CDH3,CDH5,CDH13
GO: Biological Process	GO:0042327	positive regulation of phosphorylation		0.000203	0.8345	0.004371	0.0389	22	1197	RAMP3,ANGPT1,HBEGF,PECAM1,RGCC,CAV1,CAV2,TEK,GDF10,EDNRB,GHR,LRRN3,KL,ADRB2,MS4A2,AGER,CD36,PLA2G1B,C5AR1,CCL23,VEGFD,MARCO
GO: Biological Process	GO:0048284	organelle fusion		0.0002031	0.8349	0.004371	0.0389	20	1032	VWF,PECAM1,GATA2,CAV2,MMRN1,CD93,CFD,STX1A,ADRB2,PTPRB,MS4A2,STXBP6,CD36,CLEC3B,C5AR1,HBB,STX11,VEGFD,PID1,FOXF1
GO: Biological Process	GO:2000352	negative regulation of endothelial cell apoptotic process		0.0002062	0.8478	0.004393	0.03909	4	37	RAMP2,ANGPT1,GATA2,TEK
GO: Biological Process	GO:0061384	heart trabecula morphogenesis		0.0002062	0.8478	0.004393	0.03909	4	37	ADAMTS1,TEK,S1PR1,TGFBR3
GO: Biological Process	GO:0043116	negative regulation of vascular permeability		0.0002085	0.8571	0.004418	0.03931	3	15	RAMP2,ANGPT1,SLIT2
GO: Biological Process	GO:0034097	response to cytokine		0.0002161	0.8883	0.004556	0.04054	23	1287	CLDN18,KRT8,ANGPT1,SPP1,SOX17,CAV1,AQP4,S1PR1,ZFP36,FABP4,GHR,SLIT2,STX1A,CD36,LAMP3,PCOLCE2,CCL23,MMP12,STX11,ACKR1,PID1,FOXF1,COL1A1
GO: Biological Process	GO:0022603	regulation of anatomical structure morphogenesis		0.0002185	0.8984	0.004583	0.04079	23	1288	RAMP2,ADAMTS1,SPP1,RGCC,WASF3,GATA2,SOX17,CPB2,TEK,ITPKA,LIMS2,HOXA5,TGFBR3,SLIT2,THBS2,ADRB2,GPC3,CD36,C5AR1,VEGFD,TMEM100,CDH5,PID1
GO: Biological Process	GO:0040008	regulation of growth		0.0002207	0.9075	0.004607	0.04099	17	801	FBLN5,CACNA2D2,SPP1,HBEGF,SOX17,PHLDA2,CRYAB,GHR,TGFBR3,SLIT2,MT1M,ADRB2,GPC3,FAM107A,CCNB2,FHL1,SFN
GO: Biological Process	GO:0044087	regulation of cellular component biogenesis		0.0002248	0.924	0.004667	0.04153	20	1040	GPM6A,GPM6B,PECAM1,RGCC,CAV1,TEK,S1PR1,LDB2,CRYAB,SLIT2,RASIP1,THBS2,LRRN3,STX1A,FAM107A,STXBP6,CD36,KANK3,CLDN5,CDH5
GO: Biological Process	GO:0009967	positive regulation of signal transduction		0.0002263	0.9303	0.004672	0.04157	29	1823	RAMP3,ANGPT1,HBEGF,PECAM1,CAV1,CAV2,TEK,GDF10,LIMS2,GHR,TGFBR3,STX1A,KL,ADRB2,GPC3,AGER,CD36,ASPM,PLA2G1B,SRPX,C5AR1,CCL23,MMP12,CDH3,CDH5,MARCO,CDH13,SFN,COL1A1
GO: Biological Process	GO:0044057	regulation of system process		0.0002273	0.9344	0.004672	0.04157	16	727	CACNA2D2,HBEGF,WASF3,FXYD6,CAV1,EDNRB,NMU,DES,STX1A,ADRB2,AGER,CALCRL,TNNC1,FXYD1,TMEM100,EPAS1
GO: Biological Process	GO:0001503	ossification		0.0002305	0.9477	0.004715	0.04196	12	444	GPM6B,SPP1,ID3,TEK,GDF10,S1PR1,TGFBR3,KL,ADRB2,GPC3,CLEC3B,COL1A1
GO: Biological Process	GO:1903034	regulation of response to wounding		0.0002386	0.981	0.004856	0.04322	8	205	SPP1,HBEGF,CPB2,CAV1,THBD,ADRB2,AGER,CD36
GO: Biological Process	GO:0090130	tissue migration		0.0002406	0.989	0.004872	0.04335	11	381	ANGPT1,HBEGF,PECAM1,RGCC,GATA2,TEK,TGFBR3,SLIT2,AGER,CDH13,FOXF1
GO: Biological Process	GO:0046849	bone remodeling		0.0002476	1	0.004947	0.04402	6	110	CLDN18,SPP1,PDK4,S1PR1,ADRB2,CA2
GO: Biological Process	GO:0034103	regulation of tissue remodeling		0.0002476	1	0.004947	0.04402	6	110	CLDN18,SPP1,PDK4,S1PR1,AGER,CA2
GO: Biological Process	GO:1901701	cellular response to oxygen-containing compound		0.0002497	1	0.004947	0.04402	23	1300	FBLN5,RAMP3,SPP1,PDK4,ID3,CPB2,CAV1,CAV2,AQP4,ZFP36,EDNRB,GHR,SLIT2,KL,ADRB2,AGER,CD36,LPL,PLA2G1B,CALCRL,PID1,CA2,COL1A1
GO: Biological Process	GO:0048585	negative regulation of response to stimulus		0.000252	1	0.004947	0.04402	30	1927	ANGPT1,TCF21,SPP1,HBEGF,GRK5,VSIG4,GATA2,SOX17,SOSTDC1,CPB2,CAV1,CAV2,TEK,S1PR1,ZFP36,TGFBR3,SLIT2,RASIP1,THBD,ADRB2,GPC3,AGER,LPL,WIF1,CALCRL,MMP12,CDH5,MARCO,PID1,FOXF1
GO: Biological Process	GO:0030032	lamellipodium assembly		0.0002531	1	0.004947	0.04402	5	71	PMP22,WASF3,S1PR1,SLIT2,CDH13
GO: Biological Process	GO:0072376	protein activation cascade		0.0002548	1	0.004947	0.04402	8	207	VWF,RGCC,VSIG4,CPB2,FCN3,CFD,C5AR1,C7
GO: Biological Process	GO:0060100	positive regulation of phagocytosis, engulfment		0.0002551	1	0.004947	0.04402	3	16	GATA2,AGER,CD36
GO: Biological Process	GO:1905155	positive regulation of membrane invagination		0.0002551	1	0.004947	0.04402	3	16	GATA2,AGER,CD36
GO: Biological Process	GO:0060347	heart trabecula formation		0.0002551	1	0.004947	0.04402	3	16	ADAMTS1,TEK,TGFBR3
GO: Biological Process	GO:0001101	response to acid chemical		0.0002689	1	0.00519	0.04619	11	386	CDO1,KRT8,PDK4,ID3,BCHE,TEK,TGFBR3,CD36,LPL,PID1,COL1A1
GO: Biological Process	GO:0007162	negative regulation of cell adhesion		0.000273	1	0.005244	0.04667	10	324	ANGPT1,RGCC,VSIG4,JAM2,ADRB2,FAM107A,AGER,MMP12,CDH13,COL1A1
GO: Biological Process	GO:0001666	response to hypoxia		0.000281	1	0.005374	0.04782	11	388	RAMP2,RGCC,CAV1,TEK,SLC2A1,CRYAB,TGFBR3,ADRB2,AGER,VEGFD,EPAS1
GO: Biological Process	GO:0006898	receptor-mediated endocytosis		0.0002936	1	0.005588	0.04973	11	390	RAMP2,RAMP3,ANGPT1,SH3GL3,CAV1,CAV2,ADRB2,CD36,CALCRL,HBB,MARCO
GO: Biological Process	GO:0050918	positive chemotaxis		0.0003073	1	0.005781	0.05144	5	74	ANGPT1,S1PR1,AGER,VEGFD,CDH13
GO: Biological Process	GO:0019755	one-carbon compound transport		0.000308	1	0.005781	0.05144	3	17	AQP4,CA2,CA4
GO: Biological Process	GO:0006957	complement activation, alternative pathway		0.000308	1	0.005781	0.05144	3	17	VSIG4,CFD,C7
GO: Biological Process	GO:0061041	regulation of wound healing		0.0003301	1	0.006141	0.05465	7	163	HBEGF,CPB2,CAV1,THBD,ADRB2,AGER,CD36
GO: Biological Process	GO:0030879	mammary gland development		0.0003301	1	0.006141	0.05465	7	163	CDO1,ETV4,SOSTDC1,CAV1,HOXA5,SLIT2,FOXF1
GO: Biological Process	GO:0030029	actin filament-based process		0.0003335	1	0.006176	0.05496	17	830	PMP22,GPM6B,KRT8,PECAM1,RGCC,WASF3,CAV1,TEK,S1PR1,ITPKA,SLIT2,DES,FAM107A,KANK3,PLA2G1B,TNNC1,FXYD1
GO: Biological Process	GO:0030947	regulation of vascular endothelial growth factor receptor signaling pathway		0.0003389	1	0.006248	0.0556	4	42	ANGPT1,TMEM204,TEK,VEGFD
GO: Biological Process	GO:0060562	epithelial tube morphogenesis		0.0003414	1	0.006266	0.05576	11	397	ANGPT1,TCF21,SOX17,ETV4,SOSTDC1,TEK,HOXA5,SLIT2,RASIP1,GPC3,FOXF1
GO: Biological Process	GO:0002252	immune effector process		0.0003531	1	0.006451	0.0574	23	1332	ANGPT1,PECAM1,RGCC,VSIG4,GATA2,CPB2,TEK,FCN3,PGC,CD93,CFD,PTPRB,MS4A2,AGER,CD36,PLA2G1B,C5AR1,C7,MMP12,HBB,STX11,DNASE1L3,FOXF1
GO: Biological Process	GO:0036293	response to decreased oxygen levels		0.0003638	1	0.006565	0.05842	11	400	RAMP2,RGCC,CAV1,TEK,SLC2A1,CRYAB,TGFBR3,ADRB2,AGER,VEGFD,EPAS1
GO: Biological Process	GO:0045055	regulated exocytosis		0.0003672	1	0.006565	0.05842	17	837	VWF,PECAM1,GATA2,MMRN1,CD93,CFD,STX1A,ADRB2,PTPRB,MS4A2,CD36,CLEC3B,C5AR1,HBB,STX11,VEGFD,FOXF1
GO: Biological Process	GO:0060099	regulation of phagocytosis, engulfment		0.0003674	1	0.006565	0.05842	3	18	GATA2,AGER,CD36
GO: Biological Process	GO:1905665	positive regulation of calcium ion import across plasma membrane		0.0003721	1	0.006565	0.05842	2	4	RAMP3,ADRB2
GO: Biological Process	GO:0019065	receptor-mediated endocytosis of virus by host cell		0.0003721	1	0.006565	0.05842	2	4	CAV1,CAV2
GO: Biological Process	GO:0048014	Tie signaling pathway		0.0003721	1	0.006565	0.05842	2	4	ANGPT1,TEK
GO: Biological Process	GO:0075509	endocytosis involved in viral entry into host cell		0.0003721	1	0.006565	0.05842	2	4	CAV1,CAV2
GO: Biological Process	GO:0003011	involuntary skeletal muscle contraction		0.0003721	1	0.006565	0.05842	2	4	ADRB2,TNNC1
GO: Biological Process	GO:0051707	response to other organism		0.0003756	1	0.006598	0.05872	26	1604	PMP22,GPM6A,KRT8,CD52,VSIG4,CAV1,FCN3,AQP4,PGC,ZFP36,EDNRB,FABP4,CFD,THBD,GPC3,AGER,CD36,LPL,PLA2G1B,C5AR1,C7,CCL23,MMP12,STX11,VEGFD,MARCO
GO: Biological Process	GO:0001938	positive regulation of endothelial cell proliferation		0.0003784	1	0.00662	0.05891	6	119	GATA2,CAV1,CAV2,TEK,VEGFD,CDH13
GO: Biological Process	GO:0008016	regulation of heart contraction		0.0003811	1	0.006639	0.05908	9	277	CACNA2D2,HBEGF,FXYD6,CAV1,NMU,DES,ADRB2,FXYD1,EPAS1
GO: Biological Process	GO:0043207	response to external biotic stimulus		0.0003828	1	0.00664	0.05909	26	1606	PMP22,GPM6A,KRT8,CD52,VSIG4,CAV1,FCN3,AQP4,PGC,ZFP36,EDNRB,FABP4,CFD,THBD,GPC3,AGER,CD36,LPL,PLA2G1B,C5AR1,C7,CCL23,MMP12,STX11,VEGFD,MARCO
GO: Biological Process	GO:0051247	positive regulation of protein metabolic process		0.0003853	1	0.006655	0.05922	29	1882	RAMP3,ANGPT1,HBEGF,PECAM1,RGCC,SOX17,CAV1,CAV2,TEK,GDF10,EDNRB,GHR,LRRN3,KL,ADRB2,MS4A2,GPC3,FAM107A,AGER,CD36,PLA2G1B,PCOLCE2,CLEC3B,C5AR1,CDC20,CCL23,VEGFD,CDH5,MARCO
GO: Biological Process	GO:0006906	vesicle fusion		0.0003924	1	0.006749	0.06006	19	1003	VWF,PECAM1,GATA2,CAV2,MMRN1,CD93,CFD,STX1A,ADRB2,PTPRB,MS4A2,STXBP6,CD36,CLEC3B,C5AR1,HBB,STX11,VEGFD,FOXF1
GO: Biological Process	GO:0019935	cyclic-nucleotide-mediated signaling		0.0003995	1	0.006843	0.0609	10	340	VIPR1,RAMP2,RAMP3,GRK5,S1PR1,EDNRB,ADRB2,CD36,CALCRL,MARCO
GO: Biological Process	GO:0009617	response to bacterium		0.0004053	1	0.006897	0.06138	16	766	PMP22,GPM6A,CD52,CAV1,PGC,ZFP36,EDNRB,FABP4,CFD,THBD,GPC3,CD36,LPL,PLA2G1B,C5AR1,VEGFD
GO: Biological Process	GO:0044331	cell-cell adhesion mediated by cadherin		0.000406	1	0.006897	0.06138	4	44	RGCC,CDH3,CDH5,CDH13
GO: Biological Process	GO:0090174	organelle membrane fusion		0.0004222	1	0.007143	0.06357	19	1009	VWF,PECAM1,GATA2,CAV2,MMRN1,CD93,CFD,STX1A,ADRB2,PTPRB,MS4A2,STXBP6,CD36,CLEC3B,C5AR1,HBB,STX11,VEGFD,FOXF1
GO: Biological Process	GO:0045807	positive regulation of endocytosis		0.0004323	1	0.007278	0.06477	6	122	ANGPT1,GATA2,CAV1,GPC3,AGER,CD36
GO: Biological Process	GO:1905153	regulation of membrane invagination		0.0004338	1	0.007278	0.06477	3	19	GATA2,AGER,CD36
GO: Biological Process	GO:1903522	regulation of blood circulation		0.0004378	1	0.007317	0.06511	10	344	CACNA2D2,HBEGF,FXYD6,CAV1,NMU,DES,ADRB2,AGER,FXYD1,EPAS1
GO: Biological Process	GO:0040007	growth		0.0004441	1	0.007391	0.06577	21	1181	PMP22,FBLN5,CACNA2D2,SPP1,HBEGF,SOX17,PHLDA2,S1PR1,CRYAB,GHR,HOXA5,TGFBR3,SLIT2,MT1M,ADRB2,GPC3,FAM107A,CCNB2,ASPM,FHL1,SFN
GO: Biological Process	GO:0070372	regulation of ERK1 and ERK2 cascade		0.0004479	1	0.007424	0.06606	10	345	RAMP3,ANGPT1,CAV1,TEK,TGFBR3,AGER,CD36,C5AR1,CCL23,MARCO
GO: Biological Process	GO:0007507	heart development		0.0004671	1	0.007712	0.06863	15	699	RAMP2,ANGPT1,ADAMTS1,SOX17,ID3,TEK,S1PR1,TGFBR3,SLIT2,GPC3,CLDN5,CALCRL,TNNC1,TMEM100,FOXF1
GO: Biological Process	GO:0009607	response to biotic stimulus		0.0004933	1	0.008111	0.07218	26	1633	PMP22,GPM6A,KRT8,CD52,VSIG4,CAV1,FCN3,AQP4,PGC,ZFP36,EDNRB,FABP4,CFD,THBD,GPC3,AGER,CD36,LPL,PLA2G1B,C5AR1,C7,CCL23,MMP12,STX11,VEGFD,MARCO
GO: Biological Process	GO:0045596	negative regulation of cell differentiation		0.0004998	1	0.008186	0.07284	17	860	PMP22,CLDN18,SPP1,GATA2,SOX17,ID3,SOSTDC1,CAV1,GDF10,ZFP36,EDNRB,HOXA5,TGFBR3,SLIT2,LMO2,ASPM,MMP11
GO: Biological Process	GO:0033002	muscle cell proliferation		0.0005052	1	0.008241	0.07334	9	288	ANGPT1,ADAMTS1,HBEGF,CAV1,S1PR1,TGFBR3,AGER,CALCRL,CDH13
GO: Biological Process	GO:0031649	heat generation		0.0005073	1	0.008244	0.07336	3	20	EDNRB,NMU,ADRB2
GO: Biological Process	GO:0048661	positive regulation of smooth muscle cell proliferation		0.0005132	1	0.008274	0.07363	6	126	ADAMTS1,HBEGF,S1PR1,AGER,CALCRL,CDH13
GO: Biological Process	GO:0006805	xenobiotic metabolic process		0.0005132	1	0.008274	0.07363	6	126	CDO1,FMO2,CES1,BCHE,GHR,AOC3
GO: Biological Process	GO:0007596	blood coagulation		0.0005353	1	0.008596	0.07649	10	353	VWF,GATA2,CPB2,CAV1,MMRN1,THBD,ADRB2,CD36,HBB,COL1A1
GO: Biological Process	GO:0061180	mammary gland epithelium development		0.0005526	1	0.008839	0.07866	5	84	ETV4,SOSTDC1,HOXA5,SLIT2,FOXF1
GO: Biological Process	GO:0001952	regulation of cell-matrix adhesion		0.0005579	1	0.008889	0.0791	6	128	GPM6B,TEK,FAM107A,CD36,MMP12,CDH13
GO: Biological Process	GO:0043616	keratinocyte proliferation		0.0005678	1	0.009012	0.0802	4	48	ZFP36,CDH3,CDH13,SFN
GO: Biological Process	GO:0030282	bone mineralization		0.0005813	1	0.009085	0.08084	6	129	GPM6B,S1PR1,KL,ADRB2,GPC3,CLEC3B
GO: Biological Process	GO:0006887	exocytosis		0.0005815	1	0.009085	0.08084	18	953	VWF,PECAM1,GATA2,MMRN1,CD93,CFD,STX1A,ADRB2,PTPRB,MS4A2,STXBP6,CD36,CLEC3B,C5AR1,HBB,STX11,VEGFD,FOXF1
GO: Biological Process	GO:0140029	exocytic process		0.0005815	1	0.009085	0.08084	18	953	VWF,PECAM1,GATA2,MMRN1,CD93,CFD,STX1A,ADRB2,PTPRB,MS4A2,STXBP6,CD36,CLEC3B,C5AR1,HBB,STX11,VEGFD,FOXF1
GO: Biological Process	GO:0099500	vesicle fusion to plasma membrane		0.0005815	1	0.009085	0.08084	18	953	VWF,PECAM1,GATA2,MMRN1,CD93,CFD,STX1A,ADRB2,PTPRB,MS4A2,STXBP6,CD36,CLEC3B,C5AR1,HBB,STX11,VEGFD,FOXF1
GO: Biological Process	GO:0030193	regulation of blood coagulation		0.0005834	1	0.009085	0.08084	5	85	CPB2,CAV1,THBD,ADRB2,CD36
GO: Biological Process	GO:0007599	hemostasis		0.0005968	1	0.00925	0.08231	10	358	VWF,GATA2,CPB2,CAV1,MMRN1,THBD,ADRB2,CD36,HBB,COL1A1
GO: Biological Process	GO:0031960	response to corticosteroid		0.0005985	1	0.00925	0.08231	7	180	CDO1,ABCA3,BCHE,ZFP36,SLIT2,FAM107A,COL1A1
GO: Biological Process	GO:0001816	cytokine production		0.000607	1	0.009325	0.08298	17	875	ANGPT1,RGCC,VSIG4,TEK,AQP4,ZFP36,FABP4,MS4A2,AGER,CD36,LPL,PLA2G1B,C5AR1,MMP12,ACKR1,VEGFD,CDH3
GO: Biological Process	GO:0002009	morphogenesis of an epithelium		0.0006096	1	0.009325	0.08298	14	641	ANGPT1,TCF21,HBEGF,SOX17,ETV4,SOSTDC1,TEK,HOXA5,SLIT2,RASIP1,GPC3,MMP12,FOXF1,CA2
GO: Biological Process	GO:1900046	regulation of hemostasis		0.0006155	1	0.009325	0.08298	5	86	CPB2,CAV1,THBD,ADRB2,CD36
GO: Biological Process	GO:0006710	androgen catabolic process		0.0006169	1	0.009325	0.08298	2	5	SPP1,HSD17B6
GO: Biological Process	GO:2000346	negative regulation of hepatocyte proliferation		0.0006169	1	0.009325	0.08298	2	5	CPB2,LIMS2
GO: Biological Process	GO:0070836	caveola assembly		0.0006169	1	0.009325	0.08298	2	5	CAV1,CAV2
GO: Biological Process	GO:0002444	myeloid leukocyte mediated immunity		0.0006216	1	0.009347	0.08318	13	568	PECAM1,GATA2,CD93,CFD,PTPRB,MS4A2,CD36,PLA2G1B,C5AR1,HBB,STX11,DNASE1L3,FOXF1
GO: Biological Process	GO:0050817	coagulation		0.000623	1	0.009347	0.08318	10	360	VWF,GATA2,CPB2,CAV1,MMRN1,THBD,ADRB2,CD36,HBB,COL1A1
GO: Biological Process	GO:0032970	regulation of actin filament-based process		0.0006394	1	0.009559	0.08506	11	428	GPM6B,PECAM1,RGCC,CAV1,TEK,S1PR1,SLIT2,FAM107A,KANK3,TNNC1,FXYD1
GO: Biological Process	GO:0030855	epithelial cell differentiation		0.0006468	1	0.009634	0.08573	17	880	KRT8,TCF21,CES1,PECAM1,SOX17,ID3,CAV1,S1PR1,ZFP36,HOXA5,CLIC5,CLDN5,CDH3,TMEM100,CDH5,FOXF1,SFN
GO: Biological Process	GO:0070371	ERK1 and ERK2 cascade		0.0006501	1	0.009649	0.08586	10	362	RAMP3,ANGPT1,CAV1,TEK,TGFBR3,AGER,CD36,C5AR1,CCL23,MARCO
GO: Biological Process	GO:0006956	complement activation		0.0006601	1	0.009761	0.08686	7	183	RGCC,VSIG4,CPB2,FCN3,CFD,C5AR1,C7
GO: Biological Process	GO:0000165	MAPK cascade		0.000677	1	0.009946	0.0885	19	1049	RAMP3,ANGPT1,HBEGF,CAV1,CAV2,TEK,GDF10,ZFP36,CRYAB,GHR,TGFBR3,KL,ADRB2,AGER,CD36,PLA2G1B,C5AR1,CCL23,MARCO
GO: Biological Process	GO:0042789	mRNA transcription by RNA polymerase II		0.0006774	1	0.009946	0.0885	3	22	SOX17,LMO2,C5AR1
GO: Biological Process	GO:0030100	regulation of endocytosis		0.0006996	1	0.01024	0.09108	8	241	ANGPT1,SH3GL3,GATA2,CAV1,GPC3,AGER,CD36,CDH13
GO: Biological Process	GO:0031623	receptor internalization		0.0007101	1	0.01035	0.09212	6	134	RAMP2,RAMP3,ANGPT1,CAV1,CD36,CALCRL
GO: Biological Process	GO:0030595	leukocyte chemotaxis		0.0007383	1	0.01061	0.09445	8	243	SPP1,S1PR1,EDNRB,SLIT2,PLA2G1B,C5AR1,CCL23,VEGFD
GO: Biological Process	GO:1990266	neutrophil migration		0.0007384	1	0.01061	0.09445	6	135	SPP1,PECAM1,SLIT2,PLA2G1B,C5AR1,CCL23
GO: Biological Process	GO:0045446	endothelial cell differentiation		0.0007384	1	0.01061	0.09445	6	135	PECAM1,SOX17,S1PR1,CLDN5,TMEM100,CDH5
GO: Biological Process	GO:0030218	erythrocyte differentiation		0.0007384	1	0.01061	0.09445	6	135	GATA2,ZFP36,HOXA5,TGFBR3,LMO2,EPAS1
GO: Biological Process	GO:0097581	lamellipodium organization		0.0007572	1	0.01082	0.09625	5	90	PMP22,WASF3,S1PR1,SLIT2,CDH13
GO: Biological Process	GO:0055114	oxidation-reduction process		0.0007596	1	0.01082	0.09625	21	1231	CDO1,FMO2,ACADL,CYP4B1,PDK4,AOX1,GPX3,COX7A1,CP,CAV1,PHLDA2,ADH1B,KL,P3H2,CD36,HSD17B6,AOC3,ALDH1A1,HBB,CDH3,PID1
GO: Biological Process	GO:0032270	positive regulation of cellular protein metabolic process		0.0007603	1	0.01082	0.09625	27	1774	RAMP3,ANGPT1,HBEGF,PECAM1,RGCC,CAV1,CAV2,TEK,GDF10,EDNRB,GHR,LRRN3,KL,ADRB2,MS4A2,FAM107A,AGER,CD36,PLA2G1B,PCOLCE2,CLEC3B,C5AR1,CDC20,CCL23,VEGFD,CDH5,MARCO
GO: Biological Process	GO:0071404	cellular response to low-density lipoprotein particle stimulus		0.0007745	1	0.01096	0.09751	3	23	CD36,LPL,CDH13
GO: Biological Process	GO:0023014	signal transduction by protein phosphorylation		0.0007756	1	0.01096	0.09751	19	1061	RAMP3,ANGPT1,HBEGF,CAV1,CAV2,TEK,GDF10,ZFP36,CRYAB,GHR,TGFBR3,KL,ADRB2,AGER,CD36,PLA2G1B,C5AR1,CCL23,MARCO
GO: Biological Process	GO:0042981	regulation of apoptotic process		0.0007934	1	0.01112	0.09898	27	1779	PMP22,RAMP2,ANGPT1,SPP1,PDK4,GRK5,RGCC,GATA2,ID3,CAV1,TEK,GDF10,MELK,ZFP36,EDNRB,LIMS2,CRYAB,HOXA5,TGFBR3,SLIT2,ADRB2,AGER,LAMP3,SRPX,C5AR1,TOP2A,SFN
GO: Biological Process	GO:0050818	regulation of coagulation		0.0007962	1	0.01112	0.09898	5	91	CPB2,CAV1,THBD,ADRB2,CD36
GO: Biological Process	GO:0016525	negative regulation of angiogenesis		0.0007983	1	0.01112	0.09898	7	189	ADAMTS1,RGCC,TEK,HOXA5,THBS2,ADRB2,CD36
GO: Biological Process	GO:0070374	positive regulation of ERK1 and ERK2 cascade		0.0007995	1	0.01112	0.09898	8	246	RAMP3,ANGPT1,TEK,AGER,CD36,C5AR1,CCL23,MARCO
GO: Biological Process	GO:0010631	epithelial cell migration		0.0008009	1	0.01112	0.09898	10	372	ANGPT1,HBEGF,PECAM1,RGCC,GATA2,TEK,TGFBR3,SLIT2,AGER,CDH13
GO: Biological Process	GO:0001701	in utero embryonic development		0.0008478	1	0.01171	0.1042	12	514	KRT8,ANGPT1,HBEGF,GATA2,SOX17,PHLDA2,TGFBR3,SLIT2,CCNB2,TMEM100,EPAS1,FOXF1
GO: Biological Process	GO:0002040	sprouting angiogenesis		0.0008491	1	0.01171	0.1042	7	191	RAMP2,ANGPT1,GATA2,TEK,SLIT2,VEGFD,CDH13
GO: Biological Process	GO:0090132	epithelium migration		0.0008514	1	0.01171	0.1042	10	375	ANGPT1,HBEGF,PECAM1,RGCC,GATA2,TEK,TGFBR3,SLIT2,AGER,CDH13
GO: Biological Process	GO:1901888	regulation of cell junction assembly		0.0008785	1	0.01204	0.1071	5	93	GPM6B,CAV1,TEK,FAM107A,CLDN5
GO: Biological Process	GO:0045761	regulation of adenylate cyclase activity		0.0008874	1	0.01212	0.1079	8	250	RAMP2,RAMP3,GRK5,S1PR1,EDNRB,ADRB2,CALCRL,MARCO
GO: Biological Process	GO:0060485	mesenchyme development		0.0008928	1	0.01215	0.1081	9	312	TCF21,RGCC,EDNRB,HOXA5,TGFBR3,AGER,TMEM100,FOXF1,COL1A1
GO: Biological Process	GO:2000181	negative regulation of blood vessel morphogenesis		0.0009024	1	0.01224	0.109	7	193	ADAMTS1,RGCC,TEK,HOXA5,THBS2,ADRB2,CD36
GO: Biological Process	GO:1905664	regulation of calcium ion import across plasma membrane		0.0009206	1	0.01227	0.1092	2	6	RAMP3,ADRB2
GO: Biological Process	GO:0090673	endothelial cell-matrix adhesion		0.0009206	1	0.01227	0.1092	2	6	PECAM1,MMP12
GO: Biological Process	GO:1901552	positive regulation of endothelial cell development		0.0009206	1	0.01227	0.1092	2	6	CLDN5,CDH5
GO: Biological Process	GO:0097647	amylin receptor signaling pathway		0.0009206	1	0.01227	0.1092	2	6	RAMP2,RAMP3
GO: Biological Process	GO:1903142	positive regulation of establishment of endothelial barrier		0.0009206	1	0.01227	0.1092	2	6	CLDN5,CDH5
GO: Biological Process	GO:0051259	protein complex oligomerization		0.0009221	1	0.01227	0.1092	14	669	PMP22,VWF,ANGPT1,ACADL,SFTPC,GPX3,CAV1,CAV2,TEK,AQP4,CRYAB,TK1,HBB,COL1A1
GO: Biological Process	GO:0001822	kidney development		0.0009337	1	0.01238	0.1102	9	314	ANGPT1,TCF21,ADAMTS1,PECAM1,ID3,TEK,SLIT2,GPC3,CA2
GO: Biological Process	GO:0051930	regulation of sensory perception of pain		0.0009533	1	0.01256	0.1118	4	55	EDNRB,NMU,ADRB2,TMEM100
GO: Biological Process	GO:0045646	regulation of erythrocyte differentiation		0.0009533	1	0.01256	0.1118	4	55	GATA2,ZFP36,HOXA5,LMO2
GO: Biological Process	GO:0003206	cardiac chamber morphogenesis		0.000961	1	0.01262	0.1123	6	142	ADAMTS1,TEK,TGFBR3,SLIT2,TNNC1,FOXF1
GO: Biological Process	GO:0007267	cell-cell signaling		0.0009808	1	0.01284	0.1143	28	1899	PMP22,CACNA2D2,SPP1,GRK5,SOX17,SOSTDC1,BCHE,CAV1,CAV2,TEK,S1PR1,SLC2A1,ITPKA,NMU,HOXA5,STX1A,ADRB2,GPC3,FAM107A,AGER,WIF1,ASPM,CDC20,CCL23,STX11,CDH3,CA2,COL1A1
GO: Biological Process	GO:0031579	membrane raft organization		0.0009942	1	0.01292	0.115	3	25	PMP22,CAV1,CAV2
GO: Biological Process	GO:0045603	positive regulation of endothelial cell differentiation		0.0009942	1	0.01292	0.115	3	25	CLDN5,TMEM100,CDH5
GO: Biological Process	GO:0050776	regulation of immune response		0.0009961	1	0.01292	0.115	20	1170	ANGPT1,RGCC,VSIG4,GATA2,CPB2,CAV1,TEK,FCN3,PGC,CFD,MS4A2,AGER,CD36,PLA2G1B,C5AR1,C7,MMP12,MARCO,FOXF1,COL1A1
GO: Biological Process	GO:0051931	regulation of sensory perception		0.00102	1	0.01319	0.1174	4	56	EDNRB,NMU,ADRB2,TMEM100
GO: Biological Process	GO:0043067	regulation of programmed cell death		0.001037	1	0.01336	0.1189	27	1811	PMP22,RAMP2,ANGPT1,SPP1,PDK4,GRK5,RGCC,GATA2,ID3,CAV1,TEK,GDF10,MELK,ZFP36,EDNRB,LIMS2,CRYAB,HOXA5,TGFBR3,SLIT2,ADRB2,AGER,LAMP3,SRPX,C5AR1,TOP2A,SFN
GO: Biological Process	GO:0009790	embryo development		0.001041	1	0.01337	0.119	21	1262	KRT8,ANGPT1,TCF21,HBEGF,GATA2,SOX17,ID3,PHLDA2,HOXA5,TGFBR3,SLIT2,THBD,CLIC5,GPC3,LMO2,CCNB2,TMEM100,TOP2A,EPAS1,FOXF1,COL1A1
GO: Biological Process	GO:0072593	reactive oxygen species metabolic process		0.001066	1	0.01365	0.1215	9	320	FBLN5,PDK4,GPX3,CAV1,CRYAB,AGER,CD36,HBB,PID1
GO: Biological Process	GO:0048565	digestive tract development		0.001071	1	0.01367	0.1217	6	145	CLDN18,TCF21,SOX17,EDNRB,HOXA5,FOXF1
GO: Biological Process	GO:0043393	regulation of protein binding		0.001086	1	0.01383	0.1231	8	258	ANGPT1,CRTAC1,CAV1,PHLDA2,TGFBR3,ADRB2,CD36,CCL23
GO: Biological Process	GO:1904036	negative regulation of epithelial cell apoptotic process		0.001091	1	0.01384	0.1231	4	57	RAMP2,ANGPT1,GATA2,TEK
GO: Biological Process	GO:0034101	erythrocyte homeostasis		0.00111	1	0.01398	0.1244	6	146	GATA2,ZFP36,HOXA5,TGFBR3,LMO2,EPAS1
GO: Biological Process	GO:0071674	mononuclear cell migration		0.001112	1	0.01398	0.1244	5	98	PECAM1,SLIT2,AGER,C5AR1,CCL23
GO: Biological Process	GO:0010827	regulation of glucose transmembrane transport		0.001112	1	0.01398	0.1244	5	98	SLC2A1,GPC3,AOC3,PLA2G1B,PID1
GO: Biological Process	GO:0060216	definitive hemopoiesis		0.001117	1	0.014	0.1246	3	26	GATA2,TEK,TGFBR3
GO: Biological Process	GO:0002274	myeloid leukocyte activation		0.001123	1	0.01404	0.1249	14	683	PECAM1,VSIG4,GATA2,CD93,CFD,PTPRB,MS4A2,AGER,CD36,C5AR1,HBB,STX11,DNASE1L3,FOXF1
GO: Biological Process	GO:0043410	positive regulation of MAPK cascade		0.001141	1	0.01421	0.1264	13	607	RAMP3,ANGPT1,CAV2,TEK,GHR,KL,ADRB2,AGER,CD36,PLA2G1B,C5AR1,CCL23,MARCO
GO: Biological Process	GO:1903035	negative regulation of response to wounding		0.001164	1	0.01442	0.1283	5	99	SPP1,CPB2,THBD,ADRB2,AGER
GO: Biological Process	GO:0060443	mammary gland morphogenesis		0.001164	1	0.01442	0.1283	4	58	ETV4,SOSTDC1,CAV1,SLIT2
GO: Biological Process	GO:0045598	regulation of fat cell differentiation		0.00119	1	0.01469	0.1308	6	148	GATA2,ZFP36,LPL,WIF1,ADIRF,MMP11
GO: Biological Process	GO:0007169	transmembrane receptor protein tyrosine kinase signaling pathway		0.001199	1	0.01475	0.1313	15	767	ANGPT1,TMEM204,PDK4,HBEGF,CAV2,TEK,GHR,ANOS1,KL,ADRB2,VEGFD,CDH3,PID1,CDH13,COL1A1
GO: Biological Process	GO:0060326	cell chemotaxis		0.001265	1	0.0155	0.138	9	328	SPP1,HBEGF,S1PR1,EDNRB,SLIT2,PLA2G1B,C5AR1,CCL23,VEGFD
GO: Biological Process	GO:0061025	membrane fusion		0.001277	1	0.0155	0.138	19	1107	VWF,PECAM1,GATA2,CAV2,MMRN1,CD93,CFD,STX1A,ADRB2,PTPRB,MS4A2,STXBP6,CD36,CLEC3B,C5AR1,HBB,STX11,VEGFD,FOXF1
GO: Biological Process	GO:0003330	regulation of extracellular matrix constituent secretion		0.001282	1	0.0155	0.138	2	7	RGCC,CPB2
GO: Biological Process	GO:0019694	alkanesulfonate metabolic process		0.001282	1	0.0155	0.138	2	7	CDO1,GHR
GO: Biological Process	GO:0003160	endocardium morphogenesis		0.001282	1	0.0155	0.138	2	7	ANGPT1,SOX17
GO: Biological Process	GO:0019530	taurine metabolic process		0.001282	1	0.0155	0.138	2	7	CDO1,GHR
GO: Biological Process	GO:0048660	regulation of smooth muscle cell proliferation		0.001317	1	0.01577	0.1404	7	206	ADAMTS1,HBEGF,CAV1,S1PR1,AGER,CALCRL,CDH13
GO: Biological Process	GO:0050921	positive regulation of chemotaxis		0.001319	1	0.01577	0.1404	6	151	S1PR1,SLIT2,AGER,C5AR1,VEGFD,CDH13
GO: Biological Process	GO:0007187	G protein-coupled receptor signaling pathway, coupled to cyclic nucleotide second messenger		0.00132	1	0.01577	0.1404	8	266	VIPR1,RAMP2,RAMP3,GRK5,S1PR1,ADRB2,CALCRL,MARCO
GO: Biological Process	GO:0031279	regulation of cyclase activity		0.00132	1	0.01577	0.1404	8	266	RAMP2,RAMP3,GRK5,S1PR1,EDNRB,ADRB2,CALCRL,MARCO
GO: Biological Process	GO:0043408	regulation of MAPK cascade		0.001335	1	0.0159	0.1415	16	857	RAMP3,ANGPT1,CAV1,CAV2,TEK,GDF10,GHR,TGFBR3,KL,ADRB2,AGER,CD36,PLA2G1B,C5AR1,CCL23,MARCO
GO: Biological Process	GO:1901343	negative regulation of vasculature development		0.001354	1	0.01609	0.1432	7	207	ADAMTS1,RGCC,TEK,HOXA5,THBS2,ADRB2,CD36
GO: Biological Process	GO:0006935	chemotaxis		0.00136	1	0.01612	0.1434	14	697	ANGPT1,SPP1,HBEGF,ETV4,S1PR1,EDNRB,SLIT2,ANOS1,AGER,PLA2G1B,C5AR1,CCL23,VEGFD,CDH13
GO: Biological Process	GO:0030510	regulation of BMP signaling pathway		0.001389	1	0.0163	0.145	5	103	SOSTDC1,CAV1,TGFBR3,GPC3,CDH5
GO: Biological Process	GO:0030194	positive regulation of blood coagulation		0.001392	1	0.0163	0.145	3	28	CPB2,THBD,CD36
GO: Biological Process	GO:1900048	positive regulation of hemostasis		0.001392	1	0.0163	0.145	3	28	CPB2,THBD,CD36
GO: Biological Process	GO:0003085	negative regulation of systemic arterial blood pressure		0.001392	1	0.0163	0.145	3	28	KL,ADRB2,CD36
GO: Biological Process	GO:0050708	regulation of protein secretion		0.001398	1	0.01632	0.1453	12	545	ANGPT1,CACNA2D2,RGCC,TEK,SLC2A1,NMU,STX1A,AGER,CD36,LPL,PLA2G1B,MMP12
GO: Biological Process	GO:0021700	developmental maturation		0.001405	1	0.01633	0.1453	9	333	PMP22,GATA2,S1PR1,EDNRB,HOXA5,CDC20,CDH3,CDH5,EPAS1
GO: Biological Process	GO:0071398	cellular response to fatty acid		0.001406	1	0.01633	0.1453	4	61	PDK4,ID3,LPL,PID1
GO: Biological Process	GO:0042330	taxis		0.001416	1	0.0164	0.1459	14	700	ANGPT1,SPP1,HBEGF,ETV4,S1PR1,EDNRB,SLIT2,ANOS1,AGER,PLA2G1B,C5AR1,CCL23,VEGFD,CDH13
GO: Biological Process	GO:0071417	cellular response to organonitrogen compound		0.001435	1	0.01657	0.1475	14	701	PDK4,CAV1,CAV2,GHR,SLIT2,KL,ADRB2,AGER,CD36,LPL,PLA2G1B,PID1,CA2,COL1A1
GO: Biological Process	GO:0051339	regulation of lyase activity		0.001451	1	0.0167	0.1486	8	270	RAMP2,RAMP3,GRK5,S1PR1,EDNRB,ADRB2,CALCRL,MARCO
GO: Biological Process	GO:0003158	endothelium development		0.001459	1	0.01675	0.1491	6	154	PECAM1,SOX17,S1PR1,CLDN5,TMEM100,CDH5
GO: Biological Process	GO:0071560	cellular response to transforming growth factor beta stimulus		0.001485	1	0.017	0.1513	8	271	CAV1,CAV2,GDF10,TGFBR3,CLDN5,CLEC3B,CDH5,COL1A1
GO: Biological Process	GO:0022612	gland morphogenesis		0.001508	1	0.01718	0.1529	6	155	ETV4,SOSTDC1,CPB2,CAV1,LIMS2,SLIT2
GO: Biological Process	GO:0048659	smooth muscle cell proliferation		0.001511	1	0.01718	0.1529	7	211	ADAMTS1,HBEGF,CAV1,S1PR1,AGER,CALCRL,CDH13
GO: Biological Process	GO:0045638	negative regulation of myeloid cell differentiation		0.001513	1	0.01718	0.1529	5	105	CLDN18,GATA2,ZFP36,HOXA5,LMO2
GO: Biological Process	GO:0050663	cytokine secretion		0.00152	1	0.01721	0.1531	8	272	ANGPT1,RGCC,TEK,MS4A2,AGER,CD36,LPL,MMP12
GO: Biological Process	GO:0071711	basement membrane organization		0.001543	1	0.01738	0.1547	3	29	PMP22,RAMP2,MMP11
GO: Biological Process	GO:0009299	mRNA transcription		0.001543	1	0.01738	0.1547	3	29	SOX17,LMO2,C5AR1
GO: Biological Process	GO:0002886	regulation of myeloid leukocyte mediated immunity		0.001585	1	0.01781	0.1584	4	63	GATA2,MS4A2,DNASE1L3,FOXF1
GO: Biological Process	GO:0050715	positive regulation of cytokine secretion		0.00161	1	0.01801	0.1603	6	157	RGCC,TEK,AGER,CD36,LPL,MMP12
GO: Biological Process	GO:0060627	regulation of vesicle-mediated transport		0.001612	1	0.01801	0.1603	13	631	ANGPT1,SH3GL3,GATA2,CAV1,STX1A,ADRB2,MS4A2,GPC3,STXBP6,AGER,CD36,CDH13,FOXF1
GO: Biological Process	GO:0002275	myeloid cell activation involved in immune response		0.001678	1	0.01864	0.1659	12	557	PECAM1,GATA2,CD93,CFD,PTPRB,MS4A2,CD36,C5AR1,HBB,STX11,DNASE1L3,FOXF1
GO: Biological Process	GO:0019932	second-messenger-mediated signaling		0.001681	1	0.01864	0.1659	13	634	VIPR1,RAMP2,RAMP3,GRK5,S1PR1,EDNRB,ADRB2,CD36,C5AR1,CALCRL,TMEM100,MARCO,CDH13
GO: Biological Process	GO:0044854	plasma membrane raft assembly		0.001701	1	0.01864	0.1659	2	8	CAV1,CAV2
GO: Biological Process	GO:0035696	monocyte extravasation		0.001701	1	0.01864	0.1659	2	8	PECAM1,AGER
GO: Biological Process	GO:0001955	blood vessel maturation		0.001701	1	0.01864	0.1659	2	8	S1PR1,CDH5
GO: Biological Process	GO:0010886	positive regulation of cholesterol storage		0.001701	1	0.01864	0.1659	2	8	CD36,LPL
GO: Biological Process	GO:0003057	regulation of the force of heart contraction by chemical signal		0.001701	1	0.01864	0.1659	2	8	CAV1,ADRB2
GO: Biological Process	GO:0055123	digestive system development		0.001717	1	0.01877	0.167	6	159	CLDN18,TCF21,SOX17,EDNRB,HOXA5,FOXF1
GO: Biological Process	GO:0071559	response to transforming growth factor beta		0.001743	1	0.019	0.1691	8	278	CAV1,CAV2,GDF10,TGFBR3,CLDN5,CLEC3B,CDH5,COL1A1
GO: Biological Process	GO:0050820	positive regulation of coagulation		0.001876	1	0.02041	0.1816	3	31	CPB2,THBD,CD36
GO: Biological Process	GO:1902904	negative regulation of supramolecular fiber organization		0.001887	1	0.02047	0.1821	6	162	PECAM1,S1PR1,CRYAB,SLIT2,KANK3,CDH5
GO: Biological Process	GO:0071375	cellular response to peptide hormone stimulus		0.001935	1	0.02094	0.1863	9	349	PDK4,CAV1,CAV2,GHR,KL,LPL,PLA2G1B,PID1,CA2
GO: Biological Process	GO:0097530	granulocyte migration		0.001946	1	0.02094	0.1864	6	163	SPP1,PECAM1,SLIT2,PLA2G1B,C5AR1,CCL23
GO: Biological Process	GO:0051384	response to glucocorticoid		0.001946	1	0.02094	0.1864	6	163	CDO1,ABCA3,BCHE,ZFP36,SLIT2,FAM107A
GO: Biological Process	GO:0043112	receptor metabolic process		0.001966	1	0.0211	0.1878	7	221	RAMP2,RAMP3,ANGPT1,CAV1,HOXA5,CD36,CALCRL
GO: Biological Process	GO:0010524	positive regulation of calcium ion transport into cytosol		0.00199	1	0.02125	0.1891	4	67	RAMP3,CAV1,ADRB2,PLA2G1B
GO: Biological Process	GO:0007585	respiratory gaseous exchange by respiratory system		0.00199	1	0.02125	0.1891	4	67	SFTPC,HOXA5,ADRB2,TNNC1
GO: Biological Process	GO:0003073	regulation of systemic arterial blood pressure		0.002011	1	0.02141	0.1906	5	112	CES1,CPA3,KL,ADRB2,CD36
GO: Biological Process	GO:0003016	respiratory system process		0.002059	1	0.02187	0.1946	3	32	HOXA5,ADRB2,TNNC1
GO: Biological Process	GO:0090303	positive regulation of wound healing		0.002102	1	0.02227	0.1982	4	68	HBEGF,CPB2,THBD,CD36
GO: Biological Process	GO:0043542	endothelial cell migration		0.002172	1	0.02275	0.2025	8	288	ANGPT1,PECAM1,RGCC,GATA2,TEK,SLIT2,AGER,CDH13
GO: Biological Process	GO:0030593	neutrophil chemotaxis		0.002173	1	0.02275	0.2025	5	114	SPP1,SLIT2,PLA2G1B,C5AR1,CCL23
GO: Biological Process	GO:0048251	elastic fiber assembly		0.002175	1	0.02275	0.2025	2	9	FBLN5,MFAP4
GO: Biological Process	GO:0051541	elastin metabolic process		0.002175	1	0.02275	0.2025	2	9	HBEGF,MMP12
GO: Biological Process	GO:0060426	lung vasculature development		0.002175	1	0.02275	0.2025	2	9	TCF21,FOXF1
GO: Biological Process	GO:0045600	positive regulation of fat cell differentiation		0.002218	1	0.02314	0.2059	4	69	ZFP36,LPL,WIF1,ADIRF
GO: Biological Process	GO:0051336	regulation of hydrolase activity		0.002234	1	0.02325	0.2069	22	1435	PECAM1,CAV1,CAV2,S1PR1,EDNRB,CRYAB,SLIT2,RASIP1,ANOS1,ADRB2,MS4A2,GPC3,AGER,LPL,LAMP3,PLA2G1B,PCOLCE2,C5AR1,ALDH1A1,TNNC1,CCL23,SFN
GO: Biological Process	GO:0055094	response to lipoprotein particle		0.002251	1	0.02337	0.208	3	33	CD36,LPL,CDH13
GO: Biological Process	GO:0051130	positive regulation of cellular component organization		0.002375	1	0.0246	0.2189	21	1350	GPM6A,ANGPT1,ADAMTS1,RGCC,GATA2,CPB2,CAV1,TEK,ITPKA,LIMS2,SLIT2,RASIP1,THBS2,LRRN3,ADRB2,GPC3,AGER,CD36,CDC20,CDH5,SFN
GO: Biological Process	GO:2000377	regulation of reactive oxygen species metabolic process		0.002401	1	0.0248	0.2207	7	229	FBLN5,CAV1,CRYAB,AGER,CD36,HBB,PID1
GO: Biological Process	GO:0048568	embryonic organ development		0.002429	1	0.02503	0.2227	11	506	KRT8,TCF21,GATA2,SOX17,ID3,PHLDA2,HOXA5,CLIC5,LMO2,EPAS1,FOXF1
GO: Biological Process	GO:1900181	negative regulation of protein localization to nucleus		0.002455	1	0.02512	0.2235	3	34	CLDN18,ANGPT1,CD36
GO: Biological Process	GO:0044092	negative regulation of molecular function		0.002461	1	0.02512	0.2235	21	1354	RAMP3,PECAM1,ID3,CRTAC1,CAV1,S1PR1,ZFP36,EDNRB,FABP4,CRYAB,SLIT2,RASIP1,ANOS1,ADRB2,GPC3,AGER,AOC3,LAMP3,CCL23,MARCO,SFN
GO: Biological Process	GO:0032835	glomerulus development		0.002462	1	0.02512	0.2235	4	71	ANGPT1,TCF21,PECAM1,TEK
GO: Biological Process	GO:0032387	negative regulation of intracellular transport		0.002462	1	0.02512	0.2235	4	71	ANGPT1,CRYAB,CD36,FOXF1
GO: Biological Process	GO:0030509	BMP signaling pathway		0.002475	1	0.02518	0.2241	6	171	SOSTDC1,CAV1,TGFBR3,GPC3,TMEM100,CDH5
GO: Biological Process	GO:0002791	regulation of peptide secretion		0.002515	1	0.0255	0.2269	12	585	ANGPT1,CACNA2D2,RGCC,TEK,SLC2A1,NMU,STX1A,AGER,CD36,LPL,PLA2G1B,MMP12
GO: Biological Process	GO:0045926	negative regulation of growth		0.002518	1	0.0255	0.2269	8	295	SPP1,SOX17,CRYAB,SLIT2,MT1M,ADRB2,GPC3,FHL1
GO: Biological Process	GO:0007188	adenylate cyclase-modulating G protein-coupled receptor signaling pathway		0.002582	1	0.02606	0.2319	7	232	RAMP2,RAMP3,GRK5,S1PR1,ADRB2,CALCRL,MARCO
GO: Biological Process	GO:0051338	regulation of transferase activity		0.002586	1	0.02606	0.2319	18	1089	PMP22,ANGPT1,RGCC,CAV1,TEK,ZFP36,LDB2,FABP4,GHR,RASIP1,ADRB2,MS4A2,CCNB2,AGER,PLA2G1B,C5AR1,CDC20,SFN
GO: Biological Process	GO:0051098	regulation of binding		0.002637	1	0.02651	0.2359	10	437	ANGPT1,ID3,CRTAC1,CAV1,PHLDA2,TGFBR3,ADRB2,AGER,CD36,CCL23
GO: Biological Process	GO:0071402	cellular response to lipoprotein particle stimulus		0.00267	1	0.02677	0.2382	3	35	CD36,LPL,CDH13
GO: Biological Process	GO:0042421	norepinephrine biosynthetic process		0.002705	1	0.02679	0.2384	2	10	KL,EPAS1
GO: Biological Process	GO:0044857	plasma membrane raft organization		0.002705	1	0.02679	0.2384	2	10	CAV1,CAV2
GO: Biological Process	GO:0051918	negative regulation of fibrinolysis		0.002705	1	0.02679	0.2384	2	10	CPB2,THBD
GO: Biological Process	GO:0060353	regulation of cell adhesion molecule production		0.002705	1	0.02679	0.2384	2	10	CAV1,AQP4
GO: Biological Process	GO:2001214	positive regulation of vasculogenesis		0.002705	1	0.02679	0.2384	2	10	RAMP2,TMEM100
GO: Biological Process	GO:0010522	regulation of calcium ion transport into cytosol		0.002815	1	0.02781	0.2475	5	121	RAMP3,CAV1,ADRB2,MS4A2,PLA2G1B
GO: Biological Process	GO:0032880	regulation of protein localization		0.002839	1	0.02799	0.2491	19	1188	CLDN18,GPM6B,RAMP3,ANGPT1,CACNA2D2,RGCC,CAV2,TEK,SLC2A1,NMU,STX1A,GPC3,AGER,CD36,LPL,PLA2G1B,MMP12,PID1,SFN
GO: Biological Process	GO:0030858	positive regulation of epithelial cell differentiation		0.002863	1	0.0281	0.2501	4	74	CLDN5,TMEM100,CDH5,SFN
GO: Biological Process	GO:0048608	reproductive structure development		0.002864	1	0.0281	0.2501	11	517	KRT8,VWF,ANGPT1,TCF21,ADAMTS1,SPP1,GATA2,PHLDA2,SLIT2,ASPM,EPAS1
GO: Biological Process	GO:0010837	regulation of keratinocyte proliferation		0.002895	1	0.02825	0.2514	3	36	ZFP36,CDH3,SFN
GO: Biological Process	GO:0097242	amyloid-beta clearance		0.002895	1	0.02825	0.2514	3	36	CD36,C5AR1,MARCO
GO: Biological Process	GO:1901699	cellular response to nitrogen compound		0.002904	1	0.02825	0.2514	14	757	PDK4,CAV1,CAV2,GHR,SLIT2,KL,ADRB2,AGER,CD36,LPL,PLA2G1B,PID1,CA2,COL1A1
GO: Biological Process	GO:0050707	regulation of cytokine secretion		0.002906	1	0.02825	0.2514	7	237	ANGPT1,RGCC,TEK,AGER,CD36,LPL,MMP12
GO: Biological Process	GO:0042493	response to drug		0.003001	1	0.02908	0.2588	19	1194	CLDN18,CDO1,ABCA3,RAMP2,CYP4B1,BCHE,CPB2,CAV1,CAV2,AQP4,CRYAB,SLIT2,LPL,ADIRF,HBB,CDH3,CA2,CA4,COL1A1
GO: Biological Process	GO:0031644	regulation of nervous system process		0.00302	1	0.02908	0.2588	6	178	WASF3,EDNRB,NMU,STX1A,ADRB2,TMEM100
GO: Biological Process	GO:0006959	humoral immune response		0.00302	1	0.02908	0.2588	9	373	RGCC,VSIG4,CPB2,FCN3,PGC,CFD,PLA2G1B,C5AR1,C7
GO: Biological Process	GO:1903828	negative regulation of cellular protein localization		0.003021	1	0.02908	0.2588	5	123	CLDN18,GPM6B,ANGPT1,CD36,PID1
GO: Biological Process	GO:0061458	reproductive system development		0.003037	1	0.02917	0.2596	11	521	KRT8,VWF,ANGPT1,TCF21,ADAMTS1,SPP1,GATA2,PHLDA2,SLIT2,ASPM,EPAS1
GO: Biological Process	GO:0009306	protein secretion		0.003083	1	0.02955	0.2629	13	680	ANGPT1,CACNA2D2,RGCC,TEK,SLC2A1,NMU,STX1A,MS4A2,AGER,CD36,LPL,PLA2G1B,MMP12
GO: Biological Process	GO:0035592	establishment of protein localization to extracellular region		0.003122	1	0.02985	0.2656	13	681	ANGPT1,CACNA2D2,RGCC,TEK,SLC2A1,NMU,STX1A,MS4A2,AGER,CD36,LPL,PLA2G1B,MMP12
GO: Biological Process	GO:0006811	ion transport		0.003135	1	0.0299	0.2661	27	1956	GPM6A,GPM6B,ABCA3,RAMP2,RAMP3,CACNA2D2,COX7A1,FXYD6,CP,ADAMTS8,CAV1,ABCA8,SLC2A1,FABP4,STX1A,ADRB2,CLIC5,MS4A2,AGER,CD36,PLA2G1B,CALCRL,FHL1,HBB,FXYD1,CA2,CA4
GO: Biological Process	GO:0002262	myeloid cell homeostasis		0.003191	1	0.03029	0.2696	6	180	GATA2,ZFP36,HOXA5,TGFBR3,LMO2,EPAS1
GO: Biological Process	GO:0030856	regulation of epithelial cell differentiation		0.003191	1	0.03029	0.2696	6	180	CAV1,ZFP36,CLDN5,TMEM100,CDH5,SFN
GO: Biological Process	GO:0010632	regulation of epithelial cell migration		0.003212	1	0.03043	0.2708	8	307	ANGPT1,HBEGF,RGCC,GATA2,TEK,TGFBR3,SLIT2,AGER
GO: Biological Process	GO:0048762	mesenchymal cell differentiation		0.003261	1	0.03068	0.273	7	242	TCF21,RGCC,EDNRB,TGFBR3,AGER,TMEM100,COL1A1
GO: Biological Process	GO:0010739	positive regulation of protein kinase A signaling		0.003289	1	0.03068	0.273	2	11	RAMP3,ADRB2
GO: Biological Process	GO:0070341	fat cell proliferation		0.003289	1	0.03068	0.273	2	11	GATA2,PID1
GO: Biological Process	GO:0070344	regulation of fat cell proliferation		0.003289	1	0.03068	0.273	2	11	GATA2,PID1
GO: Biological Process	GO:0070278	extracellular matrix constituent secretion		0.003289	1	0.03068	0.273	2	11	RGCC,CPB2
GO: Biological Process	GO:0048617	embryonic foregut morphogenesis		0.003289	1	0.03068	0.273	2	11	SOX17,FOXF1
GO: Biological Process	GO:0050778	positive regulation of immune response		0.003297	1	0.03068	0.273	16	938	RGCC,VSIG4,GATA2,CPB2,CAV1,TEK,FCN3,PGC,CFD,MS4A2,CD36,PLA2G1B,C5AR1,C7,MMP12,MARCO
GO: Biological Process	GO:0006940	regulation of smooth muscle contraction		0.003306	1	0.03068	0.273	4	77	CAV1,NMU,ADRB2,CALCRL
GO: Biological Process	GO:0055008	cardiac muscle tissue morphogenesis		0.003306	1	0.03068	0.273	4	77	ANGPT1,S1PR1,TGFBR3,TNNC1
GO: Biological Process	GO:0043304	regulation of mast cell degranulation		0.003382	1	0.03131	0.2786	3	38	GATA2,MS4A2,FOXF1
GO: Biological Process	GO:0071692	protein localization to extracellular region		0.003405	1	0.03145	0.2799	13	688	ANGPT1,CACNA2D2,RGCC,TEK,SLC2A1,NMU,STX1A,MS4A2,AGER,CD36,LPL,PLA2G1B,MMP12
GO: Biological Process	GO:0006939	smooth muscle contraction		0.003584	1	0.03304	0.294	5	128	CAV1,EDNRB,NMU,ADRB2,CALCRL
GO: Biological Process	GO:0033006	regulation of mast cell activation involved in immune response		0.003642	1	0.03327	0.2961	3	39	GATA2,MS4A2,FOXF1
GO: Biological Process	GO:0030513	positive regulation of BMP signaling pathway		0.003642	1	0.03327	0.2961	3	39	TGFBR3,GPC3,CDH5
GO: Biological Process	GO:0071772	response to BMP		0.00365	1	0.03327	0.2961	6	185	SOSTDC1,CAV1,TGFBR3,GPC3,TMEM100,CDH5
GO: Biological Process	GO:0071773	cellular response to BMP stimulus		0.00365	1	0.03327	0.2961	6	185	SOSTDC1,CAV1,TGFBR3,GPC3,TMEM100,CDH5
GO: Biological Process	GO:0001890	placenta development		0.00365	1	0.03327	0.2961	6	185	KRT8,VWF,SPP1,GATA2,PHLDA2,EPAS1
GO: Biological Process	GO:0031398	positive regulation of protein ubiquitination		0.003705	1	0.0337	0.2999	5	129	ANGPT1,CAV1,ADRB2,FAM107A,CDC20
GO: Biological Process	GO:0050714	positive regulation of protein secretion		0.003752	1	0.03405	0.303	8	315	RGCC,TEK,NMU,AGER,CD36,LPL,PLA2G1B,MMP12
GO: Biological Process	GO:1904659	glucose transmembrane transport		0.003829	1	0.03467	0.3085	5	130	SLC2A1,GPC3,AOC3,PLA2G1B,PID1
GO: Biological Process	GO:0045944	positive regulation of transcription by RNA polymerase II		0.003895	1	0.03486	0.3102	20	1315	TCF21,RGCC,GATA2,SOX17,ETV4,S1PR1,LDB2,HOXA5,ADRB2,LMO2,PLA2G1B,ADIRF,MMP12,PID1,TOP2A,FHL5,EPAS1,CDH13,CAVIN2,FOXF1
GO: Biological Process	GO:0007178	transmembrane receptor protein serine/threonine kinase signaling pathway		0.003912	1	0.03486	0.3102	9	388	SOSTDC1,CAV1,CAV2,GDF10,TGFBR3,GPC3,CLDN5,TMEM100,CDH5
GO: Biological Process	GO:0006936	muscle contraction		0.003912	1	0.03486	0.3102	9	388	CAV1,EDNRB,NMU,CRYAB,DES,ADRB2,CALCRL,TNNC1,FXYD1
GO: Biological Process	GO:2000121	regulation of removal of superoxide radicals		0.003926	1	0.03486	0.3102	2	12	FBLN5,CD36
GO: Biological Process	GO:0043619	regulation of transcription from RNA polymerase II promoter in response to oxidative stress		0.003926	1	0.03486	0.3102	2	12	CD36,EPAS1
GO: Biological Process	GO:0002003	angiotensin maturation		0.003926	1	0.03486	0.3102	2	12	CES1,CPA3
GO: Biological Process	GO:0060352	cell adhesion molecule production		0.003926	1	0.03486	0.3102	2	12	CAV1,AQP4
GO: Biological Process	GO:0007440	foregut morphogenesis		0.003926	1	0.03486	0.3102	2	12	SOX17,FOXF1
GO: Biological Process	GO:0006069	ethanol oxidation		0.003926	1	0.03486	0.3102	2	12	ADH1B,ALDH1A1
GO: Biological Process	GO:0016999	antibiotic metabolic process		0.003956	1	0.03499	0.3113	5	131	CYP4B1,GPX3,ADH1B,ALDH1A1,HBB
GO: Biological Process	GO:0031646	positive regulation of nervous system process		0.003966	1	0.03499	0.3113	4	81	WASF3,NMU,STX1A,ADRB2
GO: Biological Process	GO:0061045	negative regulation of wound healing		0.003966	1	0.03499	0.3113	4	81	CPB2,THBD,ADRB2,AGER
GO: Biological Process	GO:0034764	positive regulation of transmembrane transport		0.003983	1	0.03506	0.312	7	251	RAMP3,ADRB2,GPC3,AGER,AOC3,FXYD1,CA2
GO: Biological Process	GO:0045785	positive regulation of cell adhesion		0.004092	1	0.03595	0.3199	10	465	ANGPT1,SPP1,CAV1,TEK,LIMS2,MMRN1,AGER,CD36,CDH13,FOXF1
GO: Biological Process	GO:0032386	regulation of intracellular transport		0.004113	1	0.03605	0.3208	9	391	ANGPT1,GATA2,TEK,CRYAB,MS4A2,CD36,TNNC1,FOXF1,SFN
GO: Biological Process	GO:0032272	negative regulation of protein polymerization		0.004144	1	0.03625	0.3226	4	82	PECAM1,SLIT2,KANK3,CDH5
GO: Biological Process	GO:1904018	positive regulation of vasculature development		0.004159	1	0.0363	0.323	7	253	RAMP2,GATA2,TEK,C5AR1,VEGFD,TMEM100,CDH5
GO: Biological Process	GO:0001817	regulation of cytokine production		0.004191	1	0.0365	0.3248	14	789	ANGPT1,RGCC,VSIG4,TEK,AQP4,ZFP36,AGER,CD36,LPL,C5AR1,MMP12,ACKR1,VEGFD,CDH3
GO: Biological Process	GO:0008645	hexose transmembrane transport		0.004219	1	0.03667	0.3263	5	133	SLC2A1,GPC3,AOC3,PLA2G1B,PID1
GO: Biological Process	GO:0071466	cellular response to xenobiotic stimulus		0.004264	1	0.03698	0.3291	6	191	CDO1,FMO2,CES1,BCHE,GHR,AOC3
GO: Biological Process	GO:0043299	leukocyte degranulation		0.004318	1	0.03737	0.3326	11	546	PECAM1,GATA2,CD93,CFD,PTPRB,MS4A2,CD36,C5AR1,HBB,STX11,FOXF1
GO: Biological Process	GO:0001937	negative regulation of endothelial cell proliferation		0.004327	1	0.03737	0.3326	4	83	RGCC,CAV1,CAV2,AGER
GO: Biological Process	GO:0003205	cardiac chamber development		0.004373	1	0.03769	0.3354	6	192	ADAMTS1,TEK,TGFBR3,SLIT2,TNNC1,FOXF1
GO: Biological Process	GO:0014706	striated muscle tissue development		0.004474	1	0.03835	0.3413	10	471	PMP22,ANGPT1,TCF21,SOX17,CAV1,CAV2,S1PR1,TGFBR3,ADRB2,TNNC1
GO: Biological Process	GO:0060191	regulation of lipase activity		0.004485	1	0.03835	0.3413	6	193	S1PR1,EDNRB,MS4A2,LPL,PLA2G1B,C5AR1
GO: Biological Process	GO:0006937	regulation of muscle contraction		0.004485	1	0.03835	0.3413	6	193	CAV1,NMU,ADRB2,CALCRL,TNNC1,FXYD1
GO: Biological Process	GO:0015749	monosaccharide transmembrane transport		0.004494	1	0.03835	0.3413	5	135	SLC2A1,GPC3,AOC3,PLA2G1B,PID1
GO: Biological Process	GO:0060603	mammary gland duct morphogenesis		0.004496	1	0.03835	0.3413	3	42	ETV4,SOSTDC1,SLIT2
GO: Biological Process	GO:2000241	regulation of reproductive process		0.004598	1	0.03896	0.3467	6	194	PHLDA2,PTGDS,EDNRB,ASPM,CDC20,MMP12
GO: Biological Process	GO:0001765	membrane raft assembly		0.004615	1	0.03896	0.3467	2	13	CAV1,CAV2
GO: Biological Process	GO:0002002	regulation of angiotensin levels in blood		0.004615	1	0.03896	0.3467	2	13	CES1,CPA3
GO: Biological Process	GO:0007494	midgut development		0.004615	1	0.03896	0.3467	2	13	EDNRB,FOXF1
GO: Biological Process	GO:1900272	negative regulation of long-term synaptic potentiation		0.004615	1	0.03896	0.3467	2	13	FAM107A,AGER
GO: Biological Process	GO:1900180	regulation of protein localization to nucleus		0.004636	1	0.03906	0.3475	5	136	CLDN18,ANGPT1,CAV2,TEK,CD36
GO: Biological Process	GO:0030500	regulation of bone mineralization		0.00471	1	0.0396	0.3524	4	85	GPM6B,S1PR1,KL,ADRB2
GO: Biological Process	GO:0015701	bicarbonate transport		0.004806	1	0.04032	0.3588	3	43	HBB,CA2,CA4
GO: Biological Process	GO:0030036	actin cytoskeleton organization		0.004861	1	0.0407	0.3622	13	718	PMP22,GPM6B,KRT8,PECAM1,RGCC,WASF3,TEK,S1PR1,ITPKA,SLIT2,FAM107A,KANK3,PLA2G1B
GO: Biological Process	GO:0043549	regulation of kinase activity		0.004922	1	0.04103	0.3651	16	978	PMP22,ANGPT1,RGCC,CAV1,TEK,LDB2,FABP4,GHR,RASIP1,ADRB2,MS4A2,CCNB2,AGER,PLA2G1B,C5AR1,SFN
GO: Biological Process	GO:0071621	granulocyte chemotaxis		0.00493	1	0.04103	0.3651	5	138	SPP1,SLIT2,PLA2G1B,C5AR1,CCL23
GO: Biological Process	GO:0002920	regulation of humoral immune response		0.00493	1	0.04103	0.3651	5	138	VSIG4,CPB2,PGC,C5AR1,C7
GO: Biological Process	GO:0043009	chordate embryonic development		0.004991	1	0.04145	0.3688	14	805	KRT8,ANGPT1,HBEGF,GATA2,SOX17,PHLDA2,HOXA5,TGFBR3,SLIT2,CCNB2,TMEM100,EPAS1,FOXF1,COL1A1
GO: Biological Process	GO:0010035	response to inorganic substance		0.005022	1	0.04155	0.3697	12	638	KRT8,FBLN5,CP,CAV1,FABP4,CRYAB,MT1M,CD36,TNNC1,HBB,CA2,COL1A1
GO: Biological Process	GO:0043949	regulation of cAMP-mediated signaling		0.005023	1	0.04155	0.3697	7	262	RAMP2,RAMP3,GRK5,S1PR1,ADRB2,CALCRL,MARCO
GO: Biological Process	GO:0007519	skeletal muscle tissue development		0.005073	1	0.04183	0.3723	6	198	PMP22,TCF21,SOX17,CAV1,CAV2,ADRB2
GO: Biological Process	GO:0006631	fatty acid metabolic process		0.005078	1	0.04183	0.3723	9	404	ACADL,CES1,PDK4,CAV1,PTGDS,FABP4,CD36,LPL,PLA2G1B
GO: Biological Process	GO:0090092	regulation of transmembrane receptor protein serine/threonine kinase signaling pathway		0.005127	1	0.04208	0.3744	7	263	SOSTDC1,CAV1,CAV2,GDF10,TGFBR3,GPC3,CDH5
GO: Biological Process	GO:0030501	positive regulation of bone mineralization		0.005128	1	0.04208	0.3744	3	44	GPM6B,KL,ADRB2
GO: Biological Process	GO:0071900	regulation of protein serine/threonine kinase activity		0.005205	1	0.04263	0.3793	11	560	PMP22,RGCC,CAV1,GHR,RASIP1,ADRB2,CCNB2,AGER,PLA2G1B,C5AR1,SFN
GO: Biological Process	GO:0042445	hormone metabolic process		0.005232	1	0.04275	0.3804	7	264	SPP1,CES1,CPA3,ADH1B,GHR,HSD17B6,ALDH1A1
GO: Biological Process	GO:0051260	protein homooligomerization		0.005241	1	0.04275	0.3804	9	406	VWF,ANGPT1,ACADL,SFTPC,GPX3,CAV1,AQP4,CRYAB,TK1
GO: Biological Process	GO:1903036	positive regulation of response to wounding		0.005326	1	0.04335	0.3857	4	88	HBEGF,CPB2,THBD,CD36
GO: Biological Process	GO:0031650	regulation of heat generation		0.005357	1	0.04335	0.3857	2	14	EDNRB,NMU
GO: Biological Process	GO:0007171	activation of transmembrane receptor protein tyrosine kinase activity		0.005357	1	0.04335	0.3857	2	14	ANGPT1,ADRB2
GO: Biological Process	GO:0051917	regulation of fibrinolysis		0.005357	1	0.04335	0.3857	2	14	CPB2,THBD
GO: Biological Process	GO:0071695	anatomical structure maturation		0.005453	1	0.04404	0.3919	6	201	PMP22,S1PR1,EDNRB,HOXA5,CDH3,CDH5
GO: Biological Process	GO:0043254	regulation of protein-containing complex assembly		0.005476	1	0.04414	0.3928	10	485	PECAM1,CAV1,CRYAB,SLIT2,RASIP1,STX1A,STXBP6,CD36,KANK3,CDH5
GO: Biological Process	GO:0002790	peptide secretion		0.005507	1	0.04431	0.3943	13	729	ANGPT1,CACNA2D2,RGCC,TEK,SLC2A1,NMU,STX1A,MS4A2,AGER,CD36,LPL,PLA2G1B,MMP12
GO: Biological Process	GO:0051145	smooth muscle cell differentiation		0.005543	1	0.04451	0.3961	4	89	RAMP2,TMEM204,EDNRB,FOXF1
GO: Biological Process	GO:0098754	detoxification		0.005723	1	0.04586	0.4081	5	143	FBLN5,GPX3,MT1M,CD36,HBB
GO: Biological Process	GO:0051129	negative regulation of cellular component organization		0.005788	1	0.04629	0.4119	14	819	PMP22,SPP1,PECAM1,RGCC,SH3GL3,CAV1,S1PR1,CRYAB,SLIT2,FAM107A,KANK3,CDC20,CDH5,TOP2A
GO: Biological Process	GO:0032355	response to estradiol		0.005891	1	0.04703	0.4185	5	144	RAMP2,RAMP3,CRYAB,GHR,COL1A1
GO: Biological Process	GO:0060415	muscle tissue morphogenesis		0.005994	1	0.04768	0.4243	4	91	ANGPT1,S1PR1,TGFBR3,TNNC1
GO: Biological Process	GO:0009266	response to temperature stimulus		0.006016	1	0.04768	0.4243	7	271	PMP22,ACADL,CPB2,CRYAB,ADRB2,LPL,HSPB8
GO: Biological Process	GO:0045665	negative regulation of neuron differentiation		0.006016	1	0.04768	0.4243	7	271	PMP22,SPP1,ID3,CAV1,EDNRB,SLIT2,ASPM
GO: Biological Process	GO:0006816	calcium ion transport		0.006038	1	0.04768	0.4243	10	492	GPM6A,RAMP2,RAMP3,CACNA2D2,CAV1,STX1A,ADRB2,MS4A2,PLA2G1B,CALCRL
GO: Biological Process	GO:0071396	cellular response to lipid		0.006083	1	0.04768	0.4243	12	654	RAMP3,TCF21,SPP1,PDK4,ID3,ZFP36,EDNRB,FAM107A,CD36,LPL,PID1,COL1A1
GO: Biological Process	GO:0060249	anatomical structure homeostasis		0.006122	1	0.04768	0.4243	10	493	CLDN18,SPP1,PDK4,GATA2,S1PR1,LDB2,ADRB2,CDH3,EPAS1,CA2
GO: Biological Process	GO:0060537	muscle tissue development		0.006122	1	0.04768	0.4243	10	493	PMP22,ANGPT1,TCF21,SOX17,CAV1,CAV2,S1PR1,TGFBR3,ADRB2,TNNC1
GO: Biological Process	GO:0042308	negative regulation of protein import into nucleus		0.006149	1	0.04768	0.4243	2	15	ANGPT1,CD36
GO: Biological Process	GO:0010755	regulation of plasminogen activation		0.006149	1	0.04768	0.4243	2	15	CPB2,CLEC3B
GO: Biological Process	GO:0038166	angiotensin-activated signaling pathway		0.006149	1	0.04768	0.4243	2	15	CAV1,CA2
GO: Biological Process	GO:0003157	endocardium development		0.006149	1	0.04768	0.4243	2	15	ANGPT1,SOX17
GO: Biological Process	GO:1901550	regulation of endothelial cell development		0.006149	1	0.04768	0.4243	2	15	CLDN5,CDH5
GO: Biological Process	GO:2001212	regulation of vasculogenesis		0.006149	1	0.04768	0.4243	2	15	RAMP2,TMEM100
GO: Biological Process	GO:1904590	negative regulation of protein import		0.006149	1	0.04768	0.4243	2	15	ANGPT1,CD36
GO: Biological Process	GO:1903140	regulation of establishment of endothelial barrier		0.006149	1	0.04768	0.4243	2	15	CLDN5,CDH5
GO: Biological Process	GO:1904646	cellular response to amyloid-beta		0.00617	1	0.04768	0.4243	3	47	ADRB2,AGER,CD36
GO: Biological Process	GO:1902742	apoptotic process involved in development		0.00617	1	0.04768	0.4243	3	47	CRYAB,TGFBR3,SLIT2
GO: Biological Process	GO:0034219	carbohydrate transmembrane transport		0.006239	1	0.04812	0.4282	5	146	SLC2A1,GPC3,AOC3,PLA2G1B,PID1
GO: Biological Process	GO:0009792	embryo development ending in birth or egg hatching		0.006352	1	0.0489	0.4352	14	828	KRT8,ANGPT1,HBEGF,GATA2,SOX17,PHLDA2,HOXA5,TGFBR3,SLIT2,CCNB2,TMEM100,EPAS1,FOXF1,COL1A1
GO: Biological Process	GO:0002793	positive regulation of peptide secretion		0.006423	1	0.04935	0.4392	8	345	RGCC,TEK,NMU,AGER,CD36,LPL,PLA2G1B,MMP12
GO: Biological Process	GO:0002443	leukocyte mediated immunity		0.006492	1	0.04974	0.4427	15	918	PECAM1,GATA2,CD93,CFD,PTPRB,MS4A2,AGER,CD36,PLA2G1B,C5AR1,C7,HBB,STX11,DNASE1L3,FOXF1
GO: Biological Process	GO:0018108	peptidyl-tyrosine phosphorylation		0.006498	1	0.04974	0.4427	9	420	ANGPT1,HBEGF,PECAM1,CAV1,CAV2,TEK,MELK,GHR,CD36
GO: Biological Process	GO:0042755	eating behavior		0.006544	1	0.04989	0.4439	3	48	NMU,CD36,AOC3
GO: Biological Process	GO:0043277	apoptotic cell clearance		0.006544	1	0.04989	0.4439	3	48	FCN3,CD36,MARCO
GO: Biological Process	GO:0050808	synapse organization		0.006555	1	0.04989	0.4439	10	498	PMP22,GPM6A,CACNA2D2,WASF3,ITPKA,THBS2,LRRN3,SPARCL1,C5AR1,CDC20
GO: Biological Process	GO:0060538	skeletal muscle organ development		0.006565	1	0.04989	0.4439	6	209	PMP22,TCF21,SOX17,CAV1,CAV2,ADRB2
GO: Cellular Component	GO:0031012	extracellular matrix		5.597e-11	2.273e-08	2.273e-08	1.496e-07	24	598	PMP22,FBLN5,VWF,ADAMTS1,CPA3,ADAMTS8,GDF10,MMRN1,TGFBR3,SLIT2,MFAP4,THBS2,LRRN3,ANOS1,GPC3,P3H2,PCOLCE2,CLEC3B,SPARCL1,SRPX,MMP11,MMP12,CDH13,COL1A1
GO: Cellular Component	GO:0009986	cell surface		5.109e-10	2.074e-07	1.037e-07	6.829e-07	30	1035	PMP22,VWF,RAMP2,RAMP3,HBEGF,PECAM1,CAV1,CAV2,TEK,AQP4,S1PR1,CRYAB,GHR,CD93,TGFBR3,THBD,MS4A2,GPC3,AGER,CD36,LPL,WIF1,AOC3,PLA2G1B,SRPX,C5AR1,CDH3,CDH5,CDH13,CA4
GO: Cellular Component	GO:0062023	collagen-containing extracellular matrix		6.735e-09	2.734e-06	9.114e-07	6.002e-06	19	474	PMP22,FBLN5,VWF,ADAMTS1,CPA3,ADAMTS8,GDF10,MMRN1,SLIT2,MFAP4,THBS2,GPC3,P3H2,PCOLCE2,CLEC3B,SPARCL1,SRPX,CDH13,COL1A1
GO: Cellular Component	GO:0031226	intrinsic component of plasma membrane		1.217e-07	4.942e-05	1.236e-05	8.136e-05	36	1790	PMP22,GPM6A,VIPR1,CD52,RAMP2,RAMP3,HBEGF,FXYD6,CP,CAV1,CAV2,TEK,AQP4,S1PR1,SLC2A1,EDNRB,JAM2,GHR,TGFBR3,LYVE1,THBD,STX1A,KL,ADRB2,PTPRB,MS4A2,GPC3,AGER,CD36,TSPAN7,C5AR1,C7,CALCRL,FXYD1,MARCO,CA4
GO: Cellular Component	GO:0030141	secretory granule		4.632e-07	0.0001881	2.731e-05	0.0001798	23	884	ABCA3,VWF,SFTPC,PECAM1,SH3GL3,CPA3,CAV1,CAV2,MMRN1,CD93,CFD,THBS2,STX1A,PTPRB,CD36,LAMP3,PLA2G1B,CLEC3B,C5AR1,HBB,VEGFD,CA4,COL1A1
GO: Cellular Component	GO:1903143	adrenomedullin receptor complex		4.823e-07	0.0001958	2.731e-05	0.0001798	3	3	RAMP2,RAMP3,CALCRL
GO: Cellular Component	GO:0005911	cell-cell junction		5.393e-07	0.000219	2.731e-05	0.0001798	17	506	PMP22,CLDN18,KRT8,PECAM1,TEK,AQP4,SLC2A1,JAM2,LIMS2,DES,RASIP1,STXBP6,CLDN5,FXYD1,CDH3,CDH5,CDH13
GO: Cellular Component	GO:0045121	membrane raft		5.865e-07	0.0002381	2.731e-05	0.0001798	15	396	GPM6B,ANGPT1,PECAM1,CAV1,CAV2,TEK,S1PR1,SLC2A1,EDNRB,ADRB2,MS4A2,CD36,FXYD1,CDH13,CAVIN2
GO: Cellular Component	GO:0098857	membrane microdomain		6.054e-07	0.0002458	2.731e-05	0.0001798	15	397	GPM6B,ANGPT1,PECAM1,CAV1,CAV2,TEK,S1PR1,SLC2A1,EDNRB,ADRB2,MS4A2,CD36,FXYD1,CDH13,CAVIN2
GO: Cellular Component	GO:0098589	membrane region		9.348e-07	0.0003795	3.795e-05	0.0002499	15	411	GPM6B,ANGPT1,PECAM1,CAV1,CAV2,TEK,S1PR1,SLC2A1,EDNRB,ADRB2,MS4A2,CD36,FXYD1,CDH13,CAVIN2
GO: Cellular Component	GO:0042383	sarcolemma		1.295e-06	0.0005258	4.78e-05	0.0003148	10	175	KRT8,CAV1,CAV2,AQP4,SLC2A1,DES,ADRB2,CD36,FXYD1,CA4
GO: Cellular Component	GO:0005901	caveola		1.45e-06	0.0005886	4.905e-05	0.000323	8	102	CAV1,CAV2,SLC2A1,ADRB2,CD36,FXYD1,CDH13,CAVIN2
GO: Cellular Component	GO:0005887	integral component of plasma membrane		3.353e-06	0.001361	0.0001047	0.0006896	32	1710	PMP22,GPM6A,VIPR1,RAMP2,RAMP3,HBEGF,FXYD6,CAV1,CAV2,TEK,AQP4,SLC2A1,EDNRB,JAM2,GHR,TGFBR3,LYVE1,THBD,STX1A,KL,ADRB2,PTPRB,MS4A2,GPC3,AGER,CD36,TSPAN7,C5AR1,C7,CALCRL,FXYD1,MARCO
GO: Cellular Component	GO:0099503	secretory vesicle		3.702e-06	0.001503	0.0001074	0.0007069	24	1074	ABCA3,VWF,SFTPC,PECAM1,SH3GL3,CPA3,CAV1,CAV2,MMRN1,CD93,CFD,THBS2,STX1A,PTPRB,CD36,LAMP3,PLA2G1B,CLEC3B,C5AR1,HBB,STX11,VEGFD,CA4,COL1A1
GO: Cellular Component	GO:1903439	calcitonin family receptor complex		4.73e-06	0.001921	0.000128	0.0008431	3	5	RAMP2,RAMP3,CALCRL
GO: Cellular Component	GO:0031091	platelet alpha granule		8.211e-06	0.003333	0.0002083	0.001372	7	92	VWF,PECAM1,MMRN1,CFD,THBS2,CD36,VEGFD
GO: Cellular Component	GO:0044853	plasma membrane raft		9.432e-06	0.00383	0.0002253	0.001483	8	131	CAV1,CAV2,SLC2A1,ADRB2,CD36,FXYD1,CDH13,CAVIN2
GO: Cellular Component	GO:0038037	G protein-coupled receptor dimeric complex		1.636e-05	0.006644	0.0003691	0.002431	3	7	RAMP2,RAMP3,CALCRL
GO: Cellular Component	GO:0045177	apical part of cell		1.949e-05	0.007913	0.0004165	0.002742	14	465	SPP1,CAV1,TEK,SLC2A1,KL,ADRB2,CLIC5,AGER,CD36,ASPM,C5AR1,FXYD1,CA2,CA4
GO: Cellular Component	GO:0097648	G protein-coupled receptor complex		3.882e-05	0.01576	0.0007506	0.004942	3	9	RAMP2,RAMP3,CALCRL
GO: Cellular Component	GO:0097208	alveolar lamellar body		3.882e-05	0.01576	0.0007506	0.004942	3	9	ABCA3,SFTPC,LAMP3
GO: Cellular Component	GO:0098805	whole membrane		4.288e-05	0.01741	0.0007913	0.005211	30	1760	GPM6B,ABCA3,ANGPT1,HBEGF,PECAM1,SH3GL3,CP,CAV1,CAV2,TEK,TM6SF1,AQP4,S1PR1,SLC2A1,EDNRB,CD93,THBD,STX1A,ADRB2,PTPRB,MS4A2,CD36,HSD17B6,LAMP3,C5AR1,FXYD1,MARCO,CDH13,CAVIN2,CA4
GO: Cellular Component	GO:0097232	lamellar body membrane		6.205e-05	0.02519	0.00105	0.006912	2	2	ABCA3,LAMP3
GO: Cellular Component	GO:0097233	alveolar lamellar body membrane		6.205e-05	0.02519	0.00105	0.006912	2	2	ABCA3,LAMP3
GO: Cellular Component	GO:0030054	cell junction		0.0001515	0.06149	0.00246	0.0162	24	1352	PMP22,CLDN18,KRT8,TMEM204,PECAM1,CAV1,CAV2,TEK,AQP4,SLC2A1,JAM2,LIMS2,DES,RASIP1,STX1A,FAM107A,STXBP6,AGER,CLDN5,FHL1,FXYD1,CDH3,CDH5,CDH13
GO: Cellular Component	GO:0030667	secretory granule membrane		0.0001835	0.0745	0.002798	0.01843	10	311	ABCA3,PECAM1,CAV1,CAV2,CD93,PTPRB,CD36,LAMP3,C5AR1,CA4
GO: Cellular Component	GO:0016324	apical plasma membrane		0.0001861	0.07555	0.002798	0.01843	11	373	CAV1,TEK,SLC2A1,KL,ADRB2,CLIC5,AGER,CD36,ASPM,FXYD1,CA4
GO: Cellular Component	GO:0009897	external side of plasma membrane		0.0002611	0.106	0.003786	0.02493	12	454	VWF,PECAM1,AQP4,S1PR1,GHR,TGFBR3,MS4A2,AGER,CD36,CDH5,CDH13,CA4
GO: Cellular Component	GO:1903440	amylin receptor complex		0.0003655	0.1484	0.004947	0.03258	2	4	RAMP2,RAMP3
GO: Cellular Component	GO:0071953	elastic fiber		0.0003655	0.1484	0.004947	0.03258	2	4	FBLN5,MFAP4
GO: Cellular Component	GO:0009925	basal plasma membrane		0.0004663	0.1893	0.006107	0.04022	4	46	CAV1,TEK,AQP4,AGER
GO: Cellular Component	GO:0042599	lamellar body		0.0004944	0.2007	0.006272	0.0413	3	20	ABCA3,SFTPC,LAMP3
GO: Cellular Component	GO:0098797	plasma membrane protein complex		0.0005098	0.207	0.006272	0.0413	15	711	PMP22,KRT8,RAMP2,RAMP3,CACNA2D2,TGFBR3,STX1A,MS4A2,C7,CALCRL,FXYD1,GNG11,CDH3,CDH5,CDH13
GO: Cellular Component	GO:0016327	apicolateral plasma membrane		0.0006602	0.268	0.007883	0.05191	3	22	KRT8,THBD,CLDN5
GO: Cellular Component	GO:0097478	leaflet of membrane bilayer		0.0007783	0.316	0.008777	0.0578	14	663	VWF,PECAM1,CAV2,AQP4,S1PR1,GHR,TGFBR3,MS4A2,AGER,CD36,GNG11,CDH5,CDH13,CA4
GO: Cellular Component	GO:0098552	side of membrane		0.0007783	0.316	0.008777	0.0578	14	663	VWF,PECAM1,CAV2,AQP4,S1PR1,GHR,TGFBR3,MS4A2,AGER,CD36,GNG11,CDH5,CDH13,CA4
GO: Cellular Component	GO:0016323	basolateral plasma membrane		0.001053	0.4277	0.01156	0.07611	8	259	CAV1,TEK,AQP4,SLC2A1,AGER,C5AR1,CA2,CA4
GO: Cellular Component	GO:0016342	catenin complex		0.001504	0.6108	0.01607	0.1058	3	29	CDH3,CDH5,CDH13
GO: Cellular Component	GO:0005912	adherens junction		0.001632	0.6627	0.01699	0.1119	12	560	TMEM204,CAV1,CAV2,TEK,LIMS2,DES,FAM107A,STXBP6,FHL1,CDH3,CDH5,CDH13
GO: Cellular Component	GO:0031093	platelet alpha granule lumen		0.001927	0.7825	0.0195	0.1284	4	67	VWF,MMRN1,CFD,VEGFD
GO: Cellular Component	GO:0015629	actin cytoskeleton		0.00197	0.7997	0.0195	0.1284	15	814	GPM6A,ANGPT1,TEK,SLC2A1,CRYAB,STX1A,CLIC5,FAM107A,CD36,AOC3,CLDN5,TNNC1,CAVIN2,CA2,CA4
GO: Cellular Component	GO:0070161	anchoring junction		0.002033	0.8254	0.01965	0.1294	12	575	TMEM204,CAV1,CAV2,TEK,LIMS2,DES,FAM107A,STXBP6,FHL1,CDH3,CDH5,CDH13
GO: Cellular Component	GO:0097512	cardiac myofibril		0.002137	0.8677	0.02018	0.1329	2	9	CRYAB,DES
GO: Cellular Component	GO:0045178	basal part of cell		0.002264	0.9192	0.02089	0.1376	4	70	CAV1,TEK,AQP4,AGER
GO: Cellular Component	GO:0032432	actin filament bundle		0.00254	1	0.02292	0.1509	8	298	ANGPT1,TEK,CRYAB,FAM107A,CD36,AOC3,CA2,CA4
GO: Cellular Component	GO:0043235	receptor complex		0.00272	1	0.02401	0.1581	11	518	PMP22,VIPR1,RAMP2,RAMP3,TEK,GHR,TGFBR3,ADRB2,PTPRB,CD36,CALCRL
GO: Cellular Component	GO:0005923	bicellular tight junction		0.003227	1	0.02787	0.1835	5	126	PMP22,CLDN18,JAM2,CLDN5,CDH5
GO: Cellular Component	GO:0005788	endoplasmic reticulum lumen		0.00336	1	0.02842	0.1871	8	312	SPP1,CES1,CP,BCHE,GPC3,P3H2,SPARCL1,COL1A1
GO: Cellular Component	GO:0031225	anchored component of membrane		0.003686	1	0.03054	0.2011	6	187	CD52,CP,GPC3,DPEP2,CDH13,CA4
GO: Cellular Component	GO:0070160	tight junction		0.004065	1	0.03301	0.2173	5	133	PMP22,CLDN18,JAM2,CLDN5,CDH5
GO: Cellular Component	GO:0030659	cytoplasmic vesicle membrane		0.004385	1	0.03491	0.2299	14	800	ABCA3,HBEGF,PECAM1,CAV1,CAV2,CD93,STX1A,ADRB2,PTPRB,CD36,LAMP3,C5AR1,MARCO,CA4
GO: Cellular Component	GO:0043292	contractile fiber		0.004503	1	0.03516	0.2315	7	259	KRT8,PECAM1,SLC2A1,CRYAB,DES,TNNC1,FHL5
GO: Cellular Component	GO:0044291	cell-cell contact zone		0.004959	1	0.03799	0.2501	4	87	PECAM1,SLC2A1,DES,FXYD1
GO: Cellular Component	GO:0012506	vesicle membrane		0.005544	1	0.04168	0.2745	14	822	ABCA3,HBEGF,PECAM1,CAV1,CAV2,CD93,STX1A,ADRB2,PTPRB,CD36,LAMP3,C5AR1,MARCO,CA4
GO: Cellular Component	GO:0030018	Z disc		0.005846	1	0.04315	0.2842	5	145	KRT8,SLC2A1,CRYAB,DES,FHL5
GO: Cellular Component	GO:0048787	presynaptic active zone membrane		0.006021	1	0.04365	0.2874	3	47	GPM6A,STX1A,STX11
GO: Cellular Component	GO:0072562	blood microparticle		0.006189	1	0.04408	0.2903	5	147	CP,BCHE,FCN3,SLC2A1,HBB
GO: Cellular Component	GO:0043296	apical junction complex		0.006365	1	0.04456	0.2934	5	148	PMP22,CLDN18,JAM2,CLDN5,CDH5
GO: Cellular Component	GO:0005902	microvillus		0.007042	1	0.04846	0.3191	6	214	ANGPT1,TEK,CD36,AOC3,CA2,CA4
Pathway	1270244	Extracellular matrix organization	BioSystems: REACTOME	7.294e-05	0.03479	0.02075	0.14	12	298	FBLN5,ADAMTS1,SPP1,PECAM1,ADAMTS8,JAM2,MFAP4,P3H2,PCOLCE2,MMP11,MMP12,COL1A1
Pathway	1270225	Erythrocytes take up oxygen and release carbon dioxide	BioSystems: REACTOME	9.206e-05	0.04391	0.02075	0.14	3	9	HBB,CA2,CA4
Pathway	1269571	Calcitonin-like ligand receptors	BioSystems: REACTOME	0.0001305	0.06225	0.02075	0.14	3	10	RAMP2,RAMP3,CALCRL
Pathway	1270224	Erythrocytes take up carbon dioxide and release oxygen	BioSystems: REACTOME	0.0003039	0.145	0.02778	0.1874	3	13	HBB,CA2,CA4
Pathway	1270223	O2/CO2 exchange in erythrocytes	BioSystems: REACTOME	0.0003039	0.145	0.02778	0.1874	3	13	HBB,CA2,CA4
Pathway	1270232	Cell junction organization	BioSystems: REACTOME	0.0003494	0.1667	0.02778	0.1874	6	89	CLDN18,LIMS2,CLDN5,CDH3,CDH5,CDH13
Pathway	1270233	Cell-cell junction organization	BioSystems: REACTOME	0.0004843	0.231	0.02921	0.197	5	62	CLDN18,CLDN5,CDH3,CDH5,CDH13
Pathway	1269367	Platelet degranulation	BioSystems: REACTOME	0.00049	0.2337	0.02921	0.197	7	132	VWF,PECAM1,MMRN1,CFD,CD36,CLEC3B,VEGFD
Pathway	1383054	Defective B3GALTL causes Peters-plus syndrome (PpS)	BioSystems: REACTOME	0.000597	0.2848	0.02921	0.197	4	37	ADAMTS1,ADAMTS8,ADAMTSL3,THBS2
Pathway	1269365	Response to elevated platelet cytosolic Ca2+	BioSystems: REACTOME	0.0006123	0.2921	0.02921	0.197	7	137	VWF,PECAM1,MMRN1,CFD,CD36,CLEC3B,VEGFD
Pathway	1268735	O-glycosylation of TSR domain-containing proteins	BioSystems: REACTOME	0.0007315	0.3489	0.0314	0.2118	4	39	ADAMTS1,ADAMTS8,ADAMTSL3,THBS2
Pathway	1269373	Cell surface interactions at the vascular wall	BioSystems: REACTOME	0.0007898	0.3768	0.0314	0.2118	7	143	ANGPT1,PECAM1,CAV1,TEK,JAM2,THBD,TSPAN7
Pathway	1269575	G alpha (s) signalling events	BioSystems: REACTOME	0.0008927	0.4258	0.03276	0.221	7	146	VIPR1,RAMP2,RAMP3,GRK5,ADRB2,CALCRL,GNG11
Pathway	1270190	Phase 1 - Functionalization of compounds	BioSystems: REACTOME	0.001127	0.5378	0.03617	0.244	6	111	FMO2,CES1,CYP4B1,ADH1B,AOC3,ALDH1A1
Pathway	1269340	Hemostasis	BioSystems: REACTOME	0.001137	0.5425	0.03617	0.244	16	640	VWF,ANGPT1,PECAM1,GATA2,CAV1,TEK,JAM2,MMRN1,CFD,THBD,CD36,TSPAN7,CLEC3B,HBB,VEGFD,GNG11

## Sheet: GO
ID	Name	FDR	Hit Count
GO:0042127	regulation of cell population proliferation	1.269e-09	47
GO:0007155	cell adhesion	4.832e-09	40
GO:0022610	biological adhesion	4.832e-09	40
GO:0009719	response to endogenous stimulus	5.981e-06	38
GO:0051094	positive regulation of developmental process	1.124e-06	37
GO:1901700	response to oxygen-containing compound	1.432e-05	37
GO:0031226	intrinsic component of plasma membrane	1.236e-05	36
GO:0072359	circulatory system development	7.009e-08	35
GO:0051241	negative regulation of multicellular organismal process	1.469e-06	35
GO:0016477	cell migration	3.845e-05	35
GO:0046903	secretion	8e-05	35
GO:0051674	localization of cell	0.0002086	35
GO:0048870	cell motility	0.0002086	35
GO:0035295	tube development	1.048e-07	34
GO:0019220	regulation of phosphate metabolic process	0.0006309	34
GO:0051174	regulation of phosphorus metabolic process	0.0006309	34
GO:0042802	identical protein binding	0.00401	33
GO:0048646	anatomical structure formation involved in morphogenesis	1.748e-06	33
GO:0042325	regulation of phosphorylation	0.0002471	33
GO:0006952	defense response	0.0004267	33
GO:0001944	vasculature development	1.269e-09	32
GO:0035239	tube morphogenesis	1.506e-08	32
GO:0016050	vesicle organization	0.0005104	32
GO:0005887	integral component of plasma membrane	0.0001047	32
GO:0001568	blood vessel development	1.269e-09	31
GO:0001932	regulation of protein phosphorylation	0.0002782	31
GO:0140352	export from cell	0.0006309	31
GO:0010941	regulation of cell death	0.003662	31
GO:0048878	chemical homeostasis	2.733e-05	30
GO:0071495	cellular response to endogenous stimulus	0.0002782	30
GO:0032940	secretion by cell	0.00087	30
GO:0002682	regulation of immune system process	0.001861	30
GO:0048585	negative regulation of response to stimulus	0.004947	30
GO:0009986	cell surface	1.037e-07	30
GO:0098805	whole membrane	0.0007913	30
GO:0048514	blood vessel morphogenesis	1.269e-09	29
GO:0060429	epithelium development	0.0003403	29
GO:0009967	positive regulation of signal transduction	0.004672	29
GO:0051247	positive regulation of protein metabolic process	0.006655	29
GO:0046983	protein dimerization activity	0.00401	28
GO:0005102	signaling receptor binding	0.02075	28
GO:0080134	regulation of response to stress	0.003093	28
GO:0007267	cell-cell signaling	0.01284	28
GO:0016772	transferase activity, transferring phosphorus-containing groups	0.04007	27
GO:0001525	angiogenesis	1.269e-09	27
GO:0051093	negative regulation of developmental process	8e-05	27
GO:0032101	regulation of response to external stimulus	8.574e-05	27
GO:0032270	positive regulation of cellular protein metabolic process	0.01082	27
GO:0042981	regulation of apoptotic process	0.01112	27
GO:0043067	regulation of programmed cell death	0.01336	27
GO:0006811	ion transport	0.0299	27
GO:0033993	response to lipid	1.413e-05	26
GO:0009725	response to hormone	3.845e-05	26
GO:0008284	positive regulation of cell population proliferation	5.834e-05	26
GO:0009887	animal organ morphogenesis	0.0003354	26
GO:0051707	response to other organism	0.006598	26
GO:0043207	response to external biotic stimulus	0.00664	26
GO:0009607	response to biotic stimulus	0.008111	26
GO:0016301	kinase activity	0.0341	25
GO:0003013	circulatory system process	1.349e-08	25
GO:0050801	ion homeostasis	9.735e-06	25
GO:0010243	response to organonitrogen compound	0.0002452	25
GO:0051050	positive regulation of transport	0.0003248	25
GO:0051270	regulation of cellular component movement	0.0005578	25
GO:1901698	response to nitrogen compound	0.0005578	25
GO:0009628	response to abiotic stimulus	0.002458	25
GO:0031401	positive regulation of protein modification process	0.002499	25
GO:0008015	blood circulation	4.377e-08	24
GO:0055080	cation homeostasis	7.689e-06	24
GO:0098771	inorganic ion homeostasis	9.735e-06	24
GO:0045597	positive regulation of cell differentiation	0.0008152	24
GO:0040012	regulation of locomotion	0.001034	24
GO:0010562	positive regulation of phosphorus metabolic process	0.002155	24
GO:0045937	positive regulation of phosphate metabolic process	0.002155	24
GO:0031012	extracellular matrix	2.273e-08	24
GO:0099503	secretory vesicle	0.0001074	24
GO:0030054	cell junction	0.00246	24
GO:0016773	phosphotransferase activity, alcohol group as acceptor	0.0341	23
GO:0061061	muscle structure development	9.735e-06	23
GO:0008285	negative regulation of cell population proliferation	4.166e-05	23
GO:0030334	regulation of cell migration	0.0005195	23
GO:2000145	regulation of cell motility	0.001005	23
GO:0007167	enzyme linked receptor protein signaling pathway	0.001035	23
GO:0002684	positive regulation of immune system process	0.003912	23
GO:0034097	response to cytokine	0.004556	23
GO:0022603	regulation of anatomical structure morphogenesis	0.004583	23
GO:1901701	cellular response to oxygen-containing compound	0.004947	23
GO:0002252	immune effector process	0.006451	23
GO:0030141	secretory granule	2.731e-05	23
GO:0004672	protein kinase activity	0.02728	22
GO:0006954	inflammatory response	5.308e-05	22
GO:0055082	cellular chemical homeostasis	0.0002965	22
GO:0014070	response to organic cyclic compound	0.00137	22
GO:0019725	cellular homeostasis	0.001695	22
GO:0001934	positive regulation of protein phosphorylation	0.002678	22
GO:0071345	cellular response to cytokine stimulus	0.004078	22
GO:0042327	positive regulation of phosphorylation	0.004371	22
GO:0051336	regulation of hydrolase activity	0.02325	22
GO:0050678	regulation of epithelial cell proliferation	1.506e-08	21
GO:0050673	epithelial cell proliferation	1.487e-07	21
GO:0055065	metal ion homeostasis	5.375e-05	21
GO:0098609	cell-cell adhesion	0.0005578	21
GO:0060341	regulation of cellular localization	0.002678	21
GO:0040007	growth	0.007391	21
GO:0055114	oxidation-reduction process	0.01082	21
GO:0009790	embryo development	0.01337	21
GO:0051130	positive regulation of cellular component organization	0.0246	21
GO:0044092	negative regulation of molecular function	0.02512	21
GO:0005509	calcium ion binding	0.0002748	20
GO:0042803	protein homodimerization activity	0.01173	20
GO:1901652	response to peptide	5.538e-06	20
GO:0009611	response to wounding	0.0002061	20
GO:0071363	cellular response to growth factor stimulus	0.000219	20
GO:0070848	response to growth factor	0.0003354	20
GO:0031347	regulation of defense response	0.0007196	20
GO:0051046	regulation of secretion	0.002377	20
GO:0048284	organelle fusion	0.004371	20
GO:0044087	regulation of cellular component biogenesis	0.004667	20
GO:0050776	regulation of immune response	0.01292	20
GO:0045944	positive regulation of transcription by RNA polymerase II	0.03486	20
GO:0046914	transition metal ion binding	0.03933	19
GO:0048871	multicellular organismal homeostasis	9.735e-06	19
GO:0040017	positive regulation of locomotion	0.000166	19
GO:0030003	cellular cation homeostasis	0.000377	19
GO:0006873	cellular ion homeostasis	0.0004497	19
GO:0030155	regulation of cell adhesion	0.0006292	19
GO:1903530	regulation of secretion by cell	0.002642	19
GO:0098657	import into cell	0.003639	19
GO:0006906	vesicle fusion	0.006749	19
GO:0090174	organelle membrane fusion	0.007143	19
GO:0000165	MAPK cascade	0.009946	19
GO:0023014	signal transduction by protein phosphorylation	0.01096	19
GO:0061025	membrane fusion	0.0155	19
GO:0032880	regulation of protein localization	0.02799	19
GO:0042493	response to drug	0.02908	19
GO:0062023	collagen-containing extracellular matrix	9.114e-07	19
GO:0072507	divalent inorganic cation homeostasis	9.225e-05	18
GO:0006875	cellular metal ion homeostasis	0.0003354	18
GO:0097435	supramolecular fiber organization	0.0008432	18
GO:0006897	endocytosis	0.001439	18
GO:0010324	membrane invagination	0.001658	18
GO:0006900	vesicle budding from membrane	0.003662	18
GO:0048729	tissue morphogenesis	0.003836	18
GO:0006887	exocytosis	0.009085	18
GO:0140029	exocytic process	0.009085	18
GO:0099500	vesicle fusion to plasma membrane	0.009085	18
GO:0051338	regulation of transferase activity	0.02606	18
GO:0043062	extracellular structure organization	7.305e-05	17
GO:0050900	leukocyte migration	0.0001159	17
GO:0055074	calcium ion homeostasis	0.0001354	17
GO:0030335	positive regulation of cell migration	0.0004835	17
GO:2000147	positive regulation of cell motility	0.0006679	17
GO:0051272	positive regulation of cellular component movement	0.0009358	17
GO:0032870	cellular response to hormone stimulus	0.002499	17
GO:0040008	regulation of growth	0.004607	17
GO:0030029	actin filament-based process	0.006176	17
GO:0045055	regulated exocytosis	0.006565	17
GO:0045596	negative regulation of cell differentiation	0.008186	17
GO:0001816	cytokine production	0.009325	17
GO:0030855	epithelial cell differentiation	0.009634	17
GO:0005911	cell-cell junction	2.731e-05	17
GO:0005198	structural molecule activity	0.01854	16
GO:0031589	cell-substrate adhesion	1.223e-05	16
GO:0072503	cellular divalent inorganic cation homeostasis	0.0005216	16
GO:0034762	regulation of transmembrane transport	0.001736	16
GO:0032103	positive regulation of response to external stimulus	0.003093	16
GO:0044057	regulation of system process	0.004672	16
GO:0009617	response to bacterium	0.006897	16
GO:0043408	regulation of MAPK cascade	0.0159	16
GO:0050778	positive regulation of immune response	0.03068	16
GO:0043549	regulation of kinase activity	0.04103	16
1269340	Hemostasis	0.03617	16
GO:0030198	extracellular matrix organization	7.556e-05	15
GO:0007517	muscle organ development	0.0004074	15
GO:0043434	response to peptide hormone	0.0004096	15
GO:0001667	ameboidal-type cell migration	0.0005578	15
GO:0006874	cellular calcium ion homeostasis	0.0008152	15
GO:0042060	wound healing	0.003093	15
GO:0007507	heart development	0.007712	15
GO:0007169	transmembrane receptor protein tyrosine kinase signaling pathway	0.01475	15
GO:0002443	leukocyte mediated immunity	0.04974	15
GO:0045121	membrane raft	2.731e-05	15
GO:0098857	membrane microdomain	2.731e-05	15
GO:0098589	membrane region	3.795e-05	15
GO:0098797	plasma membrane protein complex	0.006272	15
GO:0015629	actin cytoskeleton	0.0195	15
GO:0050727	regulation of inflammatory response	0.000377	14
GO:0002697	regulation of immune effector process	0.001684	14
GO:0048732	gland development	0.002074	14
GO:0051047	positive regulation of secretion	0.002464	14
GO:0050878	regulation of body fluid levels	0.003093	14
GO:0002009	morphogenesis of an epithelium	0.009325	14
GO:0051259	protein complex oligomerization	0.01227	14
GO:0002274	myeloid leukocyte activation	0.01404	14
GO:0006935	chemotaxis	0.01612	14
GO:0042330	taxis	0.0164	14
GO:0071417	cellular response to organonitrogen compound	0.01657	14
GO:1901699	cellular response to nitrogen compound	0.02825	14
GO:0001817	regulation of cytokine production	0.0365	14
GO:0043009	chordate embryonic development	0.04145	14
GO:0051129	negative regulation of cellular component organization	0.04629	14
GO:0009792	embryo development ending in birth or egg hatching	0.0489	14
GO:0045177	apical part of cell	0.0004165	14
GO:0097478	leaflet of membrane bilayer	0.008777	14
GO:0098552	side of membrane	0.008777	14
GO:0030659	cytoplasmic vesicle membrane	0.03491	14
GO:0012506	vesicle membrane	0.04168	14
GO:0005539	glycosaminoglycan binding	4.084e-05	13
GO:1901681	sulfur compound binding	0.0001152	13
GO:0033218	amide binding	0.01273	13
GO:0051480	regulation of cytosolic calcium ion concentration	0.001005	13
GO:0032102	negative regulation of response to external stimulus	0.001624	13
GO:1901342	regulation of vasculature development	0.002503	13
GO:1903532	positive regulation of secretion by cell	0.003673	13
GO:0002444	myeloid leukocyte mediated immunity	0.009347	13
GO:0043410	positive regulation of MAPK cascade	0.01421	13
GO:0060627	regulation of vesicle-mediated transport	0.01801	13
GO:0019932	second-messenger-mediated signaling	0.01864	13
GO:0009306	protein secretion	0.02955	13
GO:0035592	establishment of protein localization to extracellular region	0.02985	13
GO:0071692	protein localization to extracellular region	0.03145	13
GO:0030036	actin cytoskeleton organization	0.0407	13
GO:0002790	peptide secretion	0.04431	13
GO:0008201	heparin binding	2.008e-05	12
GO:0042277	peptide binding	0.01173	12
GO:0034329	cell junction assembly	8.798e-05	12
GO:0034330	cell junction organization	0.0004096	12
GO:0007204	positive regulation of cytosolic calcium ion concentration	0.001243	12
GO:0001655	urogenital system development	0.001736	12
GO:0048545	response to steroid hormone	0.002678	12
GO:1901653	cellular response to peptide	0.003093	12
GO:0045765	regulation of angiogenesis	0.003394	12
GO:0070482	response to oxygen levels	0.003621	12
GO:0001503	ossification	0.004715	12
GO:0001701	in utero embryonic development	0.01171	12
GO:0050708	regulation of protein secretion	0.01632	12
GO:0002275	myeloid cell activation involved in immune response	0.01864	12
GO:0002791	regulation of peptide secretion	0.0255	12
GO:0010035	response to inorganic substance	0.04155	12
GO:0071396	cellular response to lipid	0.04768	12
GO:0009897	external side of plasma membrane	0.003786	12
GO:0005912	adherens junction	0.01699	12
GO:0070161	anchoring junction	0.01965	12
1270244	Extracellular matrix organization	0.02075	12
GO:0010810	regulation of cell-substrate adhesion	0.0002399	11
GO:0045444	fat cell differentiation	0.0003453	11
GO:0003007	heart morphogenesis	0.0009167	11
GO:0003015	heart process	0.001707	11
GO:0090287	regulation of cellular response to growth factor stimulus	0.001939	11
GO:0072001	renal system development	0.002192	11
GO:0090130	tissue migration	0.004872	11
GO:0001101	response to acid chemical	0.00519	11
GO:0001666	response to hypoxia	0.005374	11
GO:0006898	receptor-mediated endocytosis	0.005588	11
GO:0060562	epithelial tube morphogenesis	0.006266	11
GO:0036293	response to decreased oxygen levels	0.006565	11
GO:0032970	regulation of actin filament-based process	0.009559	11
GO:0048568	embryonic organ development	0.02503	11
GO:0048608	reproductive structure development	0.0281	11
GO:0061458	reproductive system development	0.02917	11
GO:0043299	leukocyte degranulation	0.03737	11
GO:0071900	regulation of protein serine/threonine kinase activity	0.04263	11
GO:0016324	apical plasma membrane	0.002798	11
GO:0043235	receptor complex	0.02401	11
GO:0005201	extracellular matrix structural constituent	0.0002748	10
GO:0050680	negative regulation of epithelial cell proliferation	0.0002086	10
GO:0008217	regulation of blood pressure	0.0004136	10
GO:0003018	vascular process in circulatory system	0.0005104	10
GO:0048771	tissue remodeling	0.0005578	10
GO:0031348	negative regulation of defense response	0.001669	10
GO:0001894	tissue homeostasis	0.001861	10
GO:0060047	heart contraction	0.004302	10
GO:0007162	negative regulation of cell adhesion	0.005244	10
GO:0019935	cyclic-nucleotide-mediated signaling	0.006843	10
GO:1903522	regulation of blood circulation	0.007317	10
GO:0070372	regulation of ERK1 and ERK2 cascade	0.007424	10
GO:0007596	blood coagulation	0.008596	10
GO:0007599	hemostasis	0.00925	10
GO:0050817	coagulation	0.009347	10
GO:0070371	ERK1 and ERK2 cascade	0.009649	10
GO:0010631	epithelial cell migration	0.01112	10
GO:0090132	epithelium migration	0.01171	10
GO:0051098	regulation of binding	0.02651	10
GO:0045785	positive regulation of cell adhesion	0.03595	10
GO:0014706	striated muscle tissue development	0.03835	10
GO:0043254	regulation of protein-containing complex assembly	0.04414	10
GO:0006816	calcium ion transport	0.04768	10
GO:0060249	anatomical structure homeostasis	0.04768	10
GO:0060537	muscle tissue development	0.04768	10
GO:0050808	synapse organization	0.04989	10
GO:0042383	sarcolemma	4.78e-05	10
GO:0030667	secretory granule membrane	0.002798	10
GO:0043177	organic acid binding	0.03933	9
GO:0001570	vasculogenesis	1.647e-05	9
GO:0045216	cell-cell junction organization	0.000487	9
GO:0001659	temperature homeostasis	0.0005743	9
GO:0048754	branching morphogenesis of an epithelial tube	0.0008714	9
GO:0001936	regulation of endothelial cell proliferation	0.0009793	9
GO:0001935	endothelial cell proliferation	0.001624	9
GO:0061138	morphogenesis of a branching epithelium	0.002464	9
GO:0050679	positive regulation of epithelial cell proliferation	0.002678	9
GO:0097529	myeloid leukocyte migration	0.002904	9
GO:0007160	cell-matrix adhesion	0.00339	9
GO:0001763	morphogenesis of a branching structure	0.003662	9
GO:0008016	regulation of heart contraction	0.006639	9
GO:0033002	muscle cell proliferation	0.008241	9
GO:0060485	mesenchyme development	0.01215	9
GO:0001822	kidney development	0.01238	9
GO:0072593	reactive oxygen species metabolic process	0.01365	9
GO:0060326	cell chemotaxis	0.0155	9
GO:0021700	developmental maturation	0.01633	9
GO:0071375	cellular response to peptide hormone stimulus	0.02094	9
GO:0006959	humoral immune response	0.02908	9
GO:0007178	transmembrane receptor protein serine/threonine kinase signaling pathway	0.03486	9
GO:0006936	muscle contraction	0.03486	9
GO:0032386	regulation of intracellular transport	0.03605	9
GO:0006631	fatty acid metabolic process	0.04183	9
GO:0051260	protein homooligomerization	0.04275	9
GO:0018108	peptidyl-tyrosine phosphorylation	0.04974	9
GO:0019955	cytokine binding	0.005616	8
GO:0004016	adenylate cyclase activity	0.02728	8
GO:0009975	cyclase activity	0.03933	8
GO:0016849	phosphorus-oxygen lyase activity	0.03933	8
GO:0007043	cell-cell junction assembly	0.0005216	8
GO:0032963	collagen metabolic process	0.0005578	8
GO:1904019	epithelial cell apoptotic process	0.0005603	8
GO:1990845	adaptive thermogenesis	0.00137	8
GO:0110148	biomineralization	0.002642	8
GO:0031214	biomineral tissue development	0.002642	8
GO:0050728	negative regulation of inflammatory response	0.003133	8
GO:1903034	regulation of response to wounding	0.004856	8
GO:0072376	protein activation cascade	0.004947	8
GO:0030100	regulation of endocytosis	0.01024	8
GO:0030595	leukocyte chemotaxis	0.01061	8
GO:0070374	positive regulation of ERK1 and ERK2 cascade	0.01112	8
GO:0045761	regulation of adenylate cyclase activity	0.01212	8
GO:0043393	regulation of protein binding	0.01383	8
GO:0007187	G protein-coupled receptor signaling pathway, coupled to cyclic nucleotide second messenger	0.01577	8
GO:0031279	regulation of cyclase activity	0.01577	8
GO:0051339	regulation of lyase activity	0.0167	8
GO:0071560	cellular response to transforming growth factor beta stimulus	0.017	8
GO:0050663	cytokine secretion	0.01721	8
GO:0071559	response to transforming growth factor beta	0.019	8
GO:0043542	endothelial cell migration	0.02275	8
GO:0045926	negative regulation of growth	0.0255	8
GO:0010632	regulation of epithelial cell migration	0.03043	8
GO:0050714	positive regulation of protein secretion	0.03405	8
GO:0002793	positive regulation of peptide secretion	0.04935	8
GO:0005901	caveola	4.905e-05	8
GO:0044853	plasma membrane raft	0.0002253	8
GO:0016323	basolateral plasma membrane	0.01156	8
GO:0032432	actin filament bundle	0.02292	8
GO:0005788	endoplasmic reticulum lumen	0.02842	8
GO:0001540	amyloid-beta binding	0.0005837	7
GO:0042562	hormone binding	0.01634	7
GO:0008237	metallopeptidase activity	0.03933	7
GO:1904035	regulation of epithelial cell apoptotic process	0.0009167	7
GO:0002576	platelet degranulation	0.002192	7
GO:0010811	positive regulation of cell-substrate adhesion	0.003093	7
GO:0120161	regulation of cold-induced thermogenesis	0.003494	7
GO:0106106	cold-induced thermogenesis	0.003494	7
GO:0034332	adherens junction organization	0.004323	7
GO:0061041	regulation of wound healing	0.006141	7
GO:0030879	mammary gland development	0.006141	7
GO:0031960	response to corticosteroid	0.00925	7
GO:0006956	complement activation	0.009761	7
GO:0016525	negative regulation of angiogenesis	0.01112	7
GO:0002040	sprouting angiogenesis	0.01171	7
GO:2000181	negative regulation of blood vessel morphogenesis	0.01224	7
GO:0048660	regulation of smooth muscle cell proliferation	0.01577	7
GO:1901343	negative regulation of vasculature development	0.01609	7
GO:0048659	smooth muscle cell proliferation	0.01718	7
GO:0043112	receptor metabolic process	0.0211	7
GO:2000377	regulation of reactive oxygen species metabolic process	0.0248	7
GO:0007188	adenylate cyclase-modulating G protein-coupled receptor signaling pathway	0.02606	7
GO:0050707	regulation of cytokine secretion	0.02825	7
GO:0048762	mesenchymal cell differentiation	0.03068	7
GO:0034764	positive regulation of transmembrane transport	0.03506	7
GO:1904018	positive regulation of vasculature development	0.0363	7
GO:0043949	regulation of cAMP-mediated signaling	0.04155	7
GO:0090092	regulation of transmembrane receptor protein serine/threonine kinase signaling pathway	0.04208	7
GO:0042445	hormone metabolic process	0.04275	7
GO:0009266	response to temperature stimulus	0.04768	7
GO:0045665	negative regulation of neuron differentiation	0.04768	7
GO:0031091	platelet alpha granule	0.0002083	7
GO:0043292	contractile fiber	0.03516	7
1269367	Platelet degranulation	0.02921	7
1269365	Response to elevated platelet cytosolic Ca2+	0.02921	7
1269373	Cell surface interactions at the vascular wall	0.0314	7
1269575	G alpha (s) signalling events	0.03276	7
GO:2000351	regulation of endothelial cell apoptotic process	0.0006679	6
GO:0072577	endothelial cell apoptotic process	0.0009167	6
GO:0045453	bone resorption	0.001308	6
GO:0070542	response to fatty acid	0.002645	6
GO:0120162	positive regulation of cold-induced thermogenesis	0.003093	6
GO:0046849	bone remodeling	0.004947	6
GO:0034103	regulation of tissue remodeling	0.004947	6
GO:0001938	positive regulation of endothelial cell proliferation	0.00662	6
GO:0045807	positive regulation of endocytosis	0.007278	6
GO:0048661	positive regulation of smooth muscle cell proliferation	0.008274	6
GO:0006805	xenobiotic metabolic process	0.008274	6
GO:0001952	regulation of cell-matrix adhesion	0.008889	6
GO:0030282	bone mineralization	0.009085	6
GO:0031623	receptor internalization	0.01035	6
GO:1990266	neutrophil migration	0.01061	6
GO:0045446	endothelial cell differentiation	0.01061	6
GO:0030218	erythrocyte differentiation	0.01061	6
GO:0003206	cardiac chamber morphogenesis	0.01262	6
GO:0048565	digestive tract development	0.01367	6
GO:0034101	erythrocyte homeostasis	0.01398	6
GO:0045598	regulation of fat cell differentiation	0.01469	6
GO:0050921	positive regulation of chemotaxis	0.01577	6
GO:0003158	endothelium development	0.01675	6
GO:0022612	gland morphogenesis	0.01718	6
GO:0050715	positive regulation of cytokine secretion	0.01801	6
GO:0055123	digestive system development	0.01877	6
GO:1902904	negative regulation of supramolecular fiber organization	0.02047	6
GO:0097530	granulocyte migration	0.02094	6
GO:0051384	response to glucocorticoid	0.02094	6
GO:0030509	BMP signaling pathway	0.02518	6
GO:0031644	regulation of nervous system process	0.02908	6
GO:0002262	myeloid cell homeostasis	0.03029	6
GO:0030856	regulation of epithelial cell differentiation	0.03029	6
GO:0071772	response to BMP	0.03327	6
GO:0071773	cellular response to BMP stimulus	0.03327	6
GO:0001890	placenta development	0.03327	6
GO:0071466	cellular response to xenobiotic stimulus	0.03698	6
GO:0003205	cardiac chamber development	0.03769	6
GO:0060191	regulation of lipase activity	0.03835	6
GO:0006937	regulation of muscle contraction	0.03835	6
GO:2000241	regulation of reproductive process	0.03896	6
GO:0007519	skeletal muscle tissue development	0.04183	6
GO:0071695	anatomical structure maturation	0.04404	6
GO:0060538	skeletal muscle organ development	0.04989	6
GO:0031225	anchored component of membrane	0.03054	6
GO:0005902	microvillus	0.04846	6
1270232	Cell junction organization	0.02778	6
1270190	Phase 1 - Functionalization of compounds	0.03617	6
GO:0017046	peptide hormone binding	0.006576	5
GO:0033293	monocarboxylic acid binding	0.01794	5
GO:0043114	regulation of vascular permeability	0.0008265	5
GO:0045124	regulation of bone resorption	0.001964	5
GO:0061383	trabecula morphogenesis	0.002087	5
GO:1904645	response to amyloid-beta	0.002642	5
GO:0046850	regulation of bone remodeling	0.003437	5
GO:0030032	lamellipodium assembly	0.004947	5
GO:0050918	positive chemotaxis	0.005781	5
GO:0061180	mammary gland epithelium development	0.008839	5
GO:0030193	regulation of blood coagulation	0.009085	5
GO:1900046	regulation of hemostasis	0.009325	5
GO:0097581	lamellipodium organization	0.01082	5
GO:0050818	regulation of coagulation	0.01112	5
GO:1901888	regulation of cell junction assembly	0.01204	5
GO:0071674	mononuclear cell migration	0.01398	5
GO:0010827	regulation of glucose transmembrane transport	0.01398	5
GO:1903035	negative regulation of response to wounding	0.01442	5
GO:0030510	regulation of BMP signaling pathway	0.0163	5
GO:0045638	negative regulation of myeloid cell differentiation	0.01718	5
GO:0003073	regulation of systemic arterial blood pressure	0.02141	5
GO:0030593	neutrophil chemotaxis	0.02275	5
GO:0010522	regulation of calcium ion transport into cytosol	0.02781	5
GO:1903828	negative regulation of cellular protein localization	0.02908	5
GO:0006939	smooth muscle contraction	0.03304	5
GO:0031398	positive regulation of protein ubiquitination	0.0337	5
GO:1904659	glucose transmembrane transport	0.03467	5
GO:0016999	antibiotic metabolic process	0.03499	5
GO:0008645	hexose transmembrane transport	0.03667	5
GO:0015749	monosaccharide transmembrane transport	0.03835	5
GO:1900180	regulation of protein localization to nucleus	0.03906	5
GO:0071621	granulocyte chemotaxis	0.04103	5
GO:0002920	regulation of humoral immune response	0.04103	5
GO:0098754	detoxification	0.04586	5
GO:0032355	response to estradiol	0.04703	5
GO:0034219	carbohydrate transmembrane transport	0.04812	5
GO:0005923	bicellular tight junction	0.02787	5
GO:0070160	tight junction	0.03301	5
GO:0030018	Z disc	0.04315	5
GO:0072562	blood microparticle	0.04408	5
GO:0043296	apical junction complex	0.04456	5
1270233	Cell-cell junction organization	0.02921	5
GO:0005504	fatty acid binding	0.01614	4
GO:0005080	protein kinase C binding	0.03933	4
GO:0015669	gas transport	0.001097	4
GO:0085029	extracellular matrix assembly	0.002074	4
GO:0060343	trabecula formation	0.002074	4
GO:0050927	positive regulation of positive chemotaxis	0.002288	4
GO:0050926	regulation of positive chemotaxis	0.002499	4
GO:0072012	glomerulus vasculature development	0.002678	4
GO:0061440	kidney vasculature development	0.003186	4
GO:0061437	renal system vasculature development	0.003186	4
GO:2000352	negative regulation of endothelial cell apoptotic process	0.004393	4
GO:0061384	heart trabecula morphogenesis	0.004393	4
GO:0030947	regulation of vascular endothelial growth factor receptor signaling pathway	0.006248	4
GO:0044331	cell-cell adhesion mediated by cadherin	0.006897	4
GO:0043616	keratinocyte proliferation	0.009012	4
GO:0051930	regulation of sensory perception of pain	0.01256	4
GO:0045646	regulation of erythrocyte differentiation	0.01256	4
GO:0051931	regulation of sensory perception	0.01319	4
GO:1904036	negative regulation of epithelial cell apoptotic process	0.01384	4
GO:0060443	mammary gland morphogenesis	0.01442	4
GO:0071398	cellular response to fatty acid	0.01633	4
GO:0002886	regulation of myeloid leukocyte mediated immunity	0.01781	4
GO:0010524	positive regulation of calcium ion transport into cytosol	0.02125	4
GO:0007585	respiratory gaseous exchange by respiratory system	0.02125	4
GO:0090303	positive regulation of wound healing	0.02227	4
GO:0045600	positive regulation of fat cell differentiation	0.02314	4
GO:0032835	glomerulus development	0.02512	4
GO:0032387	negative regulation of intracellular transport	0.02512	4
GO:0030858	positive regulation of epithelial cell differentiation	0.0281	4
GO:0006940	regulation of smooth muscle contraction	0.03068	4
GO:0055008	cardiac muscle tissue morphogenesis	0.03068	4
GO:0031646	positive regulation of nervous system process	0.03499	4
GO:0061045	negative regulation of wound healing	0.03499	4
GO:0032272	negative regulation of protein polymerization	0.03625	4
GO:0001937	negative regulation of endothelial cell proliferation	0.03737	4
GO:0030500	regulation of bone mineralization	0.0396	4
GO:1903036	positive regulation of response to wounding	0.04335	4
GO:0051145	smooth muscle cell differentiation	0.04451	4
GO:0060415	muscle tissue morphogenesis	0.04768	4
GO:0009925	basal plasma membrane	0.006107	4
GO:0031093	platelet alpha granule lumen	0.0195	4
GO:0045178	basal part of cell	0.02089	4
GO:0044291	cell-cell contact zone	0.03799	4
1383054	Defective B3GALTL causes Peters-plus syndrome (PpS)	0.02921	4
1268735	O-glycosylation of TSR domain-containing proteins	0.0314	4
GO:0001605	adrenomedullin receptor activity	0.0002748	3
GO:0097642	calcitonin family receptor activity	0.001493	3
GO:0005172	vascular endothelial growth factor receptor binding	0.01173	3
GO:0001846	opsonin binding	0.01634	3
GO:0019957	C-C chemokine binding	0.02728	3
GO:0001848	complement binding	0.02728	3
GO:0055095	lipoprotein particle mediated signaling	5.657e-05	3
GO:0055096	low-density lipoprotein particle mediated signaling	5.657e-05	3
GO:1990410	adrenomedullin receptor signaling pathway	0.0001674	3
GO:0097646	calcitonin family receptor signaling pathway	0.0007196	3
GO:0015670	carbon dioxide transport	0.001005	3
GO:0045647	negative regulation of erythrocyte differentiation	0.00381	3
GO:0043116	negative regulation of vascular permeability	0.004418	3
GO:0060100	positive regulation of phagocytosis, engulfment	0.004947	3
GO:1905155	positive regulation of membrane invagination	0.004947	3
GO:0060347	heart trabecula formation	0.004947	3
GO:0019755	one-carbon compound transport	0.005781	3
GO:0006957	complement activation, alternative pathway	0.005781	3
GO:0060099	regulation of phagocytosis, engulfment	0.006565	3
GO:1905153	regulation of membrane invagination	0.007278	3
GO:0031649	heat generation	0.008244	3
GO:0042789	mRNA transcription by RNA polymerase II	0.009946	3
GO:0071404	cellular response to low-density lipoprotein particle stimulus	0.01096	3
GO:0031579	membrane raft organization	0.01292	3
GO:0045603	positive regulation of endothelial cell differentiation	0.01292	3
GO:0060216	definitive hemopoiesis	0.014	3
GO:0030194	positive regulation of blood coagulation	0.0163	3
GO:1900048	positive regulation of hemostasis	0.0163	3
GO:0003085	negative regulation of systemic arterial blood pressure	0.0163	3
GO:0071711	basement membrane organization	0.01738	3
GO:0009299	mRNA transcription	0.01738	3
GO:0050820	positive regulation of coagulation	0.02041	3
GO:0003016	respiratory system process	0.02187	3
GO:0055094	response to lipoprotein particle	0.02337	3
GO:1900181	negative regulation of protein localization to nucleus	0.02512	3
GO:0071402	cellular response to lipoprotein particle stimulus	0.02677	3
GO:0010837	regulation of keratinocyte proliferation	0.02825	3
GO:0097242	amyloid-beta clearance	0.02825	3
GO:0043304	regulation of mast cell degranulation	0.03131	3
GO:0033006	regulation of mast cell activation involved in immune response	0.03327	3
GO:0030513	positive regulation of BMP signaling pathway	0.03327	3
GO:0060603	mammary gland duct morphogenesis	0.03835	3
GO:0015701	bicarbonate transport	0.04032	3
GO:0030501	positive regulation of bone mineralization	0.04208	3
GO:1904646	cellular response to amyloid-beta	0.04768	3
GO:1902742	apoptotic process involved in development	0.04768	3
GO:0042755	eating behavior	0.04989	3
GO:0043277	apoptotic cell clearance	0.04989	3
GO:1903143	adrenomedullin receptor complex	2.731e-05	3
GO:1903439	calcitonin family receptor complex	0.000128	3
GO:0038037	G protein-coupled receptor dimeric complex	0.0003691	3
GO:0097648	G protein-coupled receptor complex	0.0007506	3
GO:0097208	alveolar lamellar body	0.0007506	3
GO:0042599	lamellar body	0.006272	3
GO:0016327	apicolateral plasma membrane	0.007883	3
GO:0016342	catenin complex	0.01607	3
GO:0048787	presynaptic active zone membrane	0.04365	3
1270225	Erythrocytes take up oxygen and release carbon dioxide	0.02075	3
1269571	Calcitonin-like ligand receptors	0.02075	3
1270224	Erythrocytes take up carbon dioxide and release oxygen	0.02778	3
1270223	O2/CO2 exchange in erythrocytes	0.02778	3
GO:1990409	adrenomedullin binding	0.00401	2
GO:0097643	amylin receptor activity	0.01347	2
GO:0097644	calcitonin family binding	0.01347	2
GO:0043184	vascular endothelial growth factor receptor 2 binding	0.03933	2
GO:0003331	positive regulation of extracellular matrix constituent secretion	0.004112	2
GO:0002086	diaphragm contraction	0.004112	2
GO:0060435	bronchiole development	0.004112	2
GO:1905665	positive regulation of calcium ion import across plasma membrane	0.006565	2
GO:0019065	receptor-mediated endocytosis of virus by host cell	0.006565	2
GO:0048014	Tie signaling pathway	0.006565	2
GO:0075509	endocytosis involved in viral entry into host cell	0.006565	2
GO:0003011	involuntary skeletal muscle contraction	0.006565	2
GO:0006710	androgen catabolic process	0.009325	2
GO:2000346	negative regulation of hepatocyte proliferation	0.009325	2
GO:0070836	caveola assembly	0.009325	2
GO:1905664	regulation of calcium ion import across plasma membrane	0.01227	2
GO:0090673	endothelial cell-matrix adhesion	0.01227	2
GO:1901552	positive regulation of endothelial cell development	0.01227	2
GO:0097647	amylin receptor signaling pathway	0.01227	2
GO:1903142	positive regulation of establishment of endothelial barrier	0.01227	2
GO:0003330	regulation of extracellular matrix constituent secretion	0.0155	2
GO:0019694	alkanesulfonate metabolic process	0.0155	2
GO:0003160	endocardium morphogenesis	0.0155	2
GO:0019530	taurine metabolic process	0.0155	2
GO:0044854	plasma membrane raft assembly	0.01864	2
GO:0035696	monocyte extravasation	0.01864	2
GO:0001955	blood vessel maturation	0.01864	2
GO:0010886	positive regulation of cholesterol storage	0.01864	2
GO:0003057	regulation of the force of heart contraction by chemical signal	0.01864	2
GO:0048251	elastic fiber assembly	0.02275	2
GO:0051541	elastin metabolic process	0.02275	2
GO:0060426	lung vasculature development	0.02275	2
GO:0042421	norepinephrine biosynthetic process	0.02679	2
GO:0044857	plasma membrane raft organization	0.02679	2
GO:0051918	negative regulation of fibrinolysis	0.02679	2
GO:0060353	regulation of cell adhesion molecule production	0.02679	2
GO:2001214	positive regulation of vasculogenesis	0.02679	2
GO:0010739	positive regulation of protein kinase A signaling	0.03068	2
GO:0070341	fat cell proliferation	0.03068	2
GO:0070344	regulation of fat cell proliferation	0.03068	2
GO:0070278	extracellular matrix constituent secretion	0.03068	2
GO:0048617	embryonic foregut morphogenesis	0.03068	2
GO:2000121	regulation of removal of superoxide radicals	0.03486	2
GO:0043619	regulation of transcription from RNA polymerase II promoter in response to oxidative stress	0.03486	2
GO:0002003	angiotensin maturation	0.03486	2
GO:0060352	cell adhesion molecule production	0.03486	2
GO:0007440	foregut morphogenesis	0.03486	2
GO:0006069	ethanol oxidation	0.03486	2
GO:0001765	membrane raft assembly	0.03896	2
GO:0002002	regulation of angiotensin levels in blood	0.03896	2
GO:0007494	midgut development	0.03896	2
GO:1900272	negative regulation of long-term synaptic potentiation	0.03896	2
GO:0031650	regulation of heat generation	0.04335	2
GO:0007171	activation of transmembrane receptor protein tyrosine kinase activity	0.04335	2
GO:0051917	regulation of fibrinolysis	0.04335	2
GO:0042308	negative regulation of protein import into nucleus	0.04768	2
GO:0010755	regulation of plasminogen activation	0.04768	2
GO:0038166	angiotensin-activated signaling pathway	0.04768	2
GO:0003157	endocardium development	0.04768	2
GO:1901550	regulation of endothelial cell development	0.04768	2
GO:2001212	regulation of vasculogenesis	0.04768	2
GO:1904590	negative regulation of protein import	0.04768	2
GO:1903140	regulation of establishment of endothelial barrier	0.04768	2
GO:0097232	lamellar body membrane	0.00105	2
GO:0097233	alveolar lamellar body membrane	0.00105	2
GO:1903440	amylin receptor complex	0.004947	2
GO:0071953	elastic fiber	0.004947	2
GO:0097512	cardiac myofibril	0.02018	2

## Sheet: pathways
Name	Source	FDR	Hit Count
Hemostasis	REACTOME	0.03617	16
Extracellular matrix organization	REACTOME	0.02075	12
Platelet degranulation	REACTOME	0.02921	7
Response to elevated platelet cytosolic Ca2+	REACTOME	0.02921	7
Cell surface interactions at the vascular wall	REACTOME	0.0314	7
G alpha (s) signalling events	REACTOME	0.03276	7
Cell junction organization	REACTOME	0.02778	6
Phase 1 - Functionalization of compounds	REACTOME	0.03617	6
Cell-cell junction organization	REACTOME	0.02921	5
Defective B3GALTL causes Peters-plus syndrome (PpS)	REACTOME	0.02921	4
O-glycosylation of TSR domain-containing proteins	REACTOME	0.0314	4
Erythrocytes take up oxygen and release carbon dioxide	REACTOME	0.02075	3
Calcitonin-like ligand receptors	REACTOME	0.02075	3
Erythrocytes take up carbon dioxide and release oxygen	REACTOME	0.02778	3
O2/CO2 exchange in erythrocytes	REACTOME	0.02778	3
